# Supplementary material for: Assembly of the heterometallic Au(i)–M(i) (M = Cu, Ag) clusters containing the dialkyne-derived diphosphines: synthesis, luminescence and theoretical studies
Source: Royal Society of Chemistry journal article supplement (doi:10.1039/c0dt00587h), 2010-01-01
Supplement: c0dt00587h.pdf [file c0dt00587h.pdf]

## Supporting Information

### Assembly of the heterometallic Au(I)-M(I) (M = Cu, Ag) clusters containing the dialkyne-derived diphosphines: synthesis, luminescence and theoretical studies

Igor O. Koshevoy,<sup>a\*</sup> Polina V. Ostrova,<sup>a,b</sup> Antti J. Karttunen,<sup>a</sup> Alexei S. Melnikov,<sup>c</sup> Mikhail A. Khodorkovskiy,<sup>c</sup> Matti Haukka,<sup>a</sup> Janne Jänis,<sup>a</sup> Sergey P. Tunik<sup>b\*</sup> and Tapani Pakkanen<sup>a\*</sup>

<sup>a</sup> University of Eastern Finland, Joensuu, Finland.

<sup>b</sup> St.-Petersburg State University, Department of Chemistry, St.-Petersburg, Russia.

<sup>c</sup> St.-Petersburg State University, Department of Physics, St.-Petersburg, Russia.

E-mail: [igor.koshevoy@uef.fi](mailto:igor.koshevoy@uef.fi); [stunik@inbox.ru](mailto:stunik@inbox.ru); [tapani.pakkanen@uef.fi](mailto:tapani.pakkanen@uef.fi)

#### X-ray Structure Determination of **6**.

The crystal of **6** was diffracting weakly. Furthermore, the crystal was unstable and some solvent of crystallization was missing. Due to the poor data quality the structure is used SOLELY as supporting material. The *Denzo-Scalepak*<sup>1</sup> program packages was used for cell refinements and data reductions. The structure was solved by direct methods using the *SHELXS-97*<sup>2</sup> program with the *WinGX*<sup>3</sup> graphical user interface. A semi-empirical absorption correction (*SADABS*)<sup>4</sup> was applied to the data. Structural refinements were carried out using *SHELXL-97*.<sup>2</sup> Only two acetone molecules were included in the final structure model. These molecules were disordered over two sites with equal occupancies. Considerable amount of solvent of crystallization was missing. Due to the large voids (485 Å<sup>3</sup>), calculation of the contribution of missing solvent to the calculated structure factors by using the SQUEEZE routine of PLATON<sup>5</sup> was not successful. Because of the low data quality a large number of geometric and displacement constraints and restraints were used. One of the PF<sub>6</sub> anions was disordered over two sites with equal occupancy. Several phenyl rings were at least slightly disordered, but no disorder models were used in the final refinement. Hydrogen atoms were positioned geometrically and constrained to ride on their parent atoms, with C-H = 0.95-0.98 Å<sup>3</sup>, and U<sub>iso</sub> = 1.2-1.5 U<sub>eq</sub>(parent atom). The crystallographic details for **6** is summarized in Table S1.

1. Z. Otwinowski, W. Minor, in *Macromolecular Crystallography, part A*, eds. J. Carter, C. W. and R. M. Sweet, Academic Press, New York, 1997, vol. 276, pp. 307-326.
2. G. M. Sheldrick, *Acta Crystallogr., Sect. A*, 2008, **A64**, 112-122.
3. L. J. Farrugia, *J. Appl. Cryst.*, 1999, **32**, 837-838.
4. G. M. Sheldrick, *SADABS-2008/1 - Bruker AXS area detector scaling and absorption correction*, Bruker AXS, Madison, Wisconsin, USA, 2008.

5. A. L. Spek, PLATON, A Multipurpose Crystallographic Tool, Utrecht University, Utrecht, The Netherlands, 2005.

**Table S1.** Crystallographic data for **6**.

| <b>6</b>                                            |                                                                                                                 |
|-----------------------------------------------------|-----------------------------------------------------------------------------------------------------------------|
| empirical formula                                   | C <sub>204</sub> H <sub>144</sub> Au <sub>9</sub> Cu <sub>6</sub> F <sub>18</sub> O <sub>2</sub> P <sub>9</sub> |
| fw                                                  | 5401.86                                                                                                         |
| temp (K)                                            | 100(2)                                                                                                          |
| $\lambda$ (Å)                                       | 0.71073                                                                                                         |
| cryst syst                                          | Monoclinic                                                                                                      |
| space group                                         | C2/c                                                                                                            |
| <i>a</i> (Å)                                        | 43.1517(5)                                                                                                      |
| <i>b</i> (Å)                                        | 25.1541(3)                                                                                                      |
| <i>c</i> (Å)                                        | 39.4692(5)                                                                                                      |
| $\alpha$ (deg)                                      | 90                                                                                                              |
| $\beta$ (deg)                                       | 110.1053(6)                                                                                                     |
| $\gamma$ (deg)                                      | 90                                                                                                              |
| <i>V</i> (Å <sup>3</sup> )                          | 40230.9(8)                                                                                                      |
| <i>Z</i>                                            | 8                                                                                                               |
| $\rho_{\text{calc}}$ (Mg/m <sup>3</sup> )           | 1.784                                                                                                           |
| $\mu$ (Mo K $\alpha$ ) (mm <sup>-1</sup> )          | 7.292                                                                                                           |
| No. reflns.                                         | 153801                                                                                                          |
| Unique reflns.                                      | 34041                                                                                                           |
| GOOF ( <i>F</i> <sup>2</sup> )                      | 1.020                                                                                                           |
| <i>R</i> <sub>int</sub>                             | 0.0623                                                                                                          |
| <i>R</i> 1 <sup>a</sup> ( <i>I</i> ≥ 2 $\sigma$ )   | 0.0907                                                                                                          |
| w <i>R</i> 2 <sup>b</sup> ( <i>I</i> ≥ 2 $\sigma$ ) | 0.2577                                                                                                          |

<sup>a</sup>  $RI = \Sigma||F_o| - |F_c||/\Sigma|F_o|$ . <sup>b</sup>  $wR2 = [\Sigma[w(F_o^2 - F_c^2)^2]/\Sigma[w(F_o^2)^2]]^{1/2}$ .

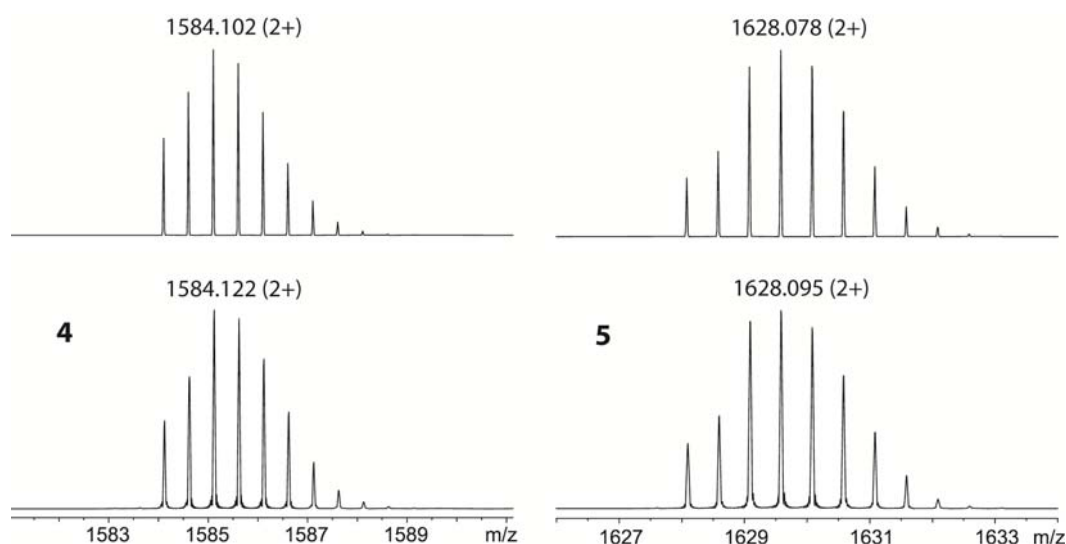

**Figure S1.** ESI-MS spectra of the  $[\text{Au}_6\text{M}_2(\text{C}_2\text{Ph})_6(\mathbf{1})_3]^{2+}$  (*M* = Cu, **4**; Ag, **5**) dications (**4**-2PF<sub>6</sub>, **5**-2ClO<sub>4</sub>). Top – calculated, bottom – experimental.

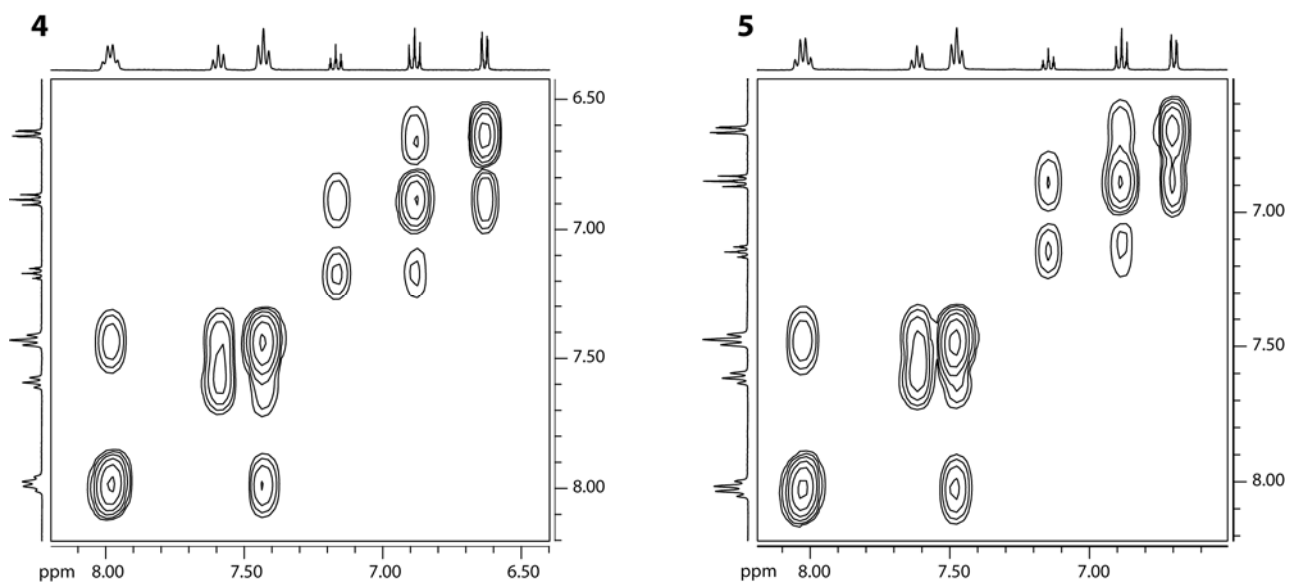

**Figure S2.**  $^1\text{H}$ - $^1\text{H}$  COSY NMR spectra of **4** and **5**, acetone- $d_6$ , 298 K.

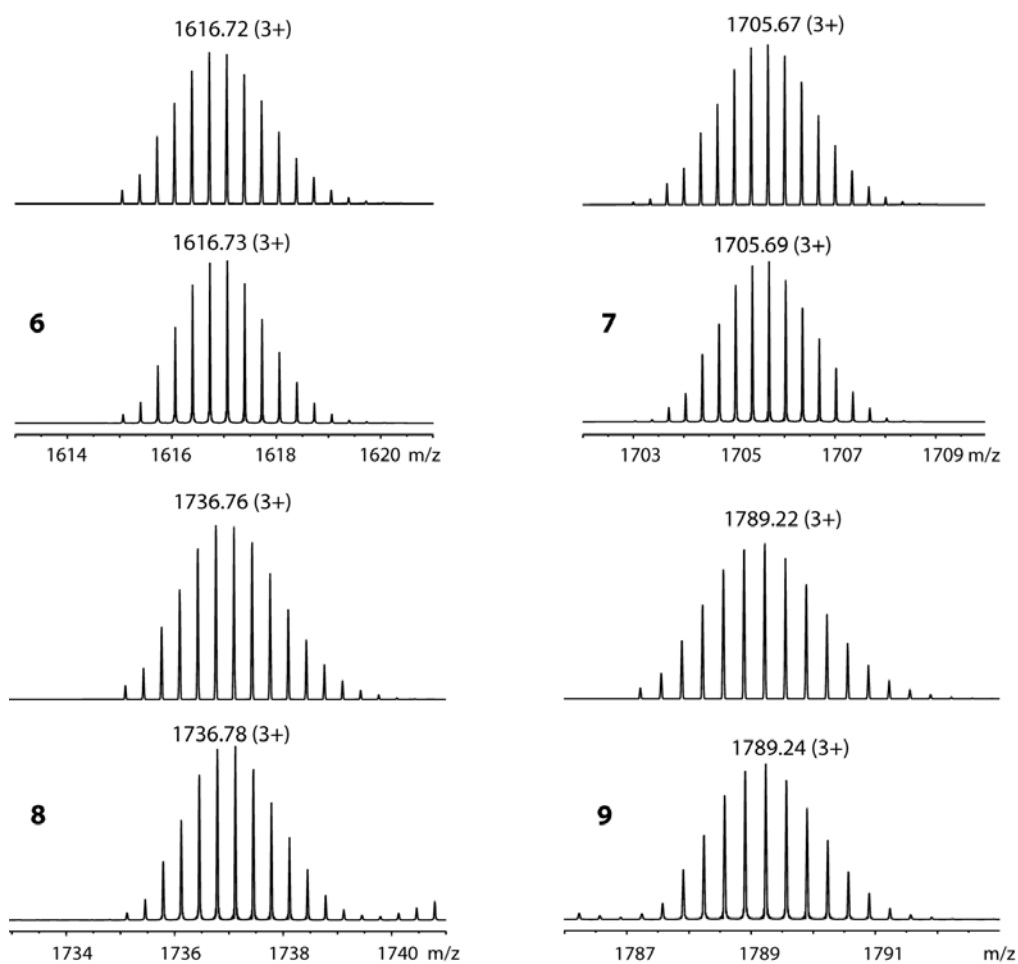

**Figure S3.** ESI-MS spectra of the  $[\text{Au}_9\text{M}_6(\text{C}_2\text{C}_6\text{H}_4\text{X})_{12}(\mathbf{2})_3]^{3+}$ ,  $\text{M} = \text{Cu}$ ,  $\text{X} = \text{H}$  (**6**);  $\text{X} = \text{OMe}$  (**8**);  $\text{X} = \text{NMe}_2$  (**9**).  $\text{M} = \text{Ag}$ ,  $\text{X} = \text{H}$  (**7**) trications (**6-9**- $3\text{PF}_6$ ). Top – calculated, bottom – experimental.

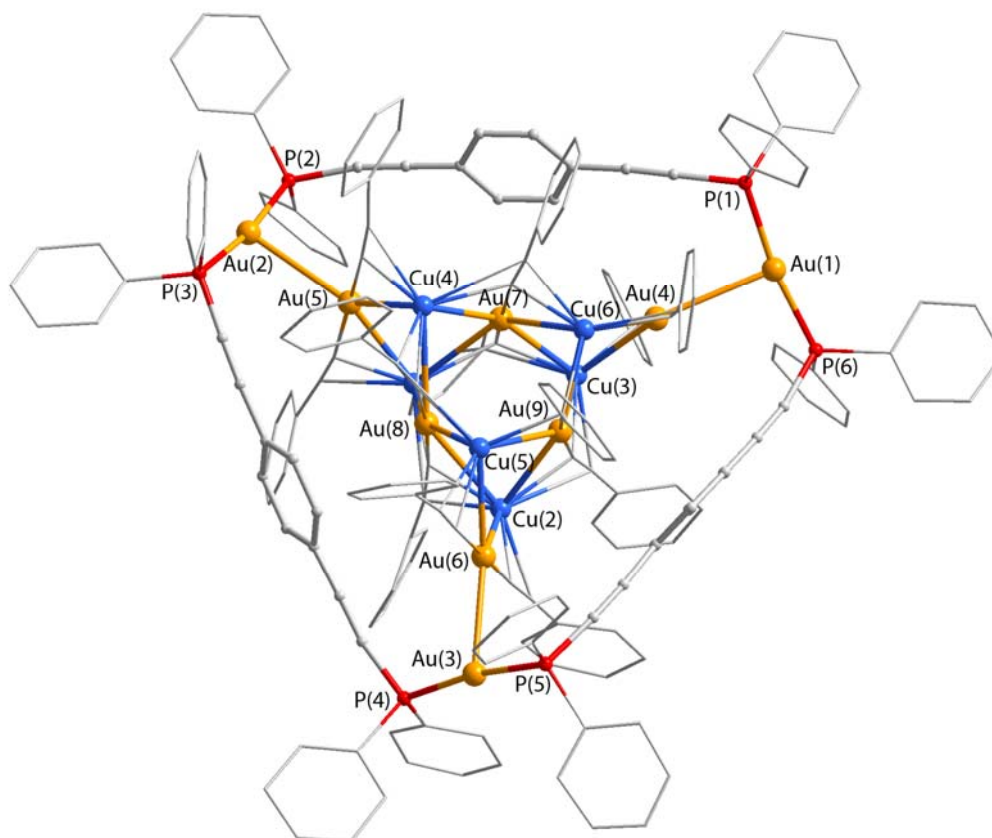

**Figure S4.** Molecular view of the dication **6**. Hydrogen atoms omitted for clarity. Selected interatomic distances (Å) are Au(1)-Au(4) = 3.0820(11), Au(2)-Au(5) = 3.0277(11), Au(3)-Au(6) = 3.0509(11), Au(4)-Cu(6) = 2.824(3), Au(4)-Cu(3) = 2.888(3), Au(5)-Cu(1) = 2.789(3), Au(5)-Cu(4) = 2.895(3), Au(6)-Cu(5) = 2.838(3), Au(6)-Cu(2) = 2.876(3), Au(7)-Cu(4) = 2.750(3), Au(7)-Cu(3) = 2.763(3), Au(7)-Cu(1) = 3.055(3), Au(7)-Cu(6) = 3.071(3), Au(7)-Au(8) = 3.2449(12), Au(7)-Au(9) = 3.2463(13), Au(8)-Cu(1) = 2.774(3), Au(8)-Cu(5) = 2.788(4), Au(8)-Cu(4) = 2.990(3), Au(8)-Cu(2) = 3.025(3), Au(8)-Au(9) = 3.2267(13), Au(9)-Cu(6) = 2.768(3), Au(9)-Cu(2) = 2.768(3), Au(9)-Cu(5) = 3.029(3), Au(9)-Cu(3) = 3.040(3).

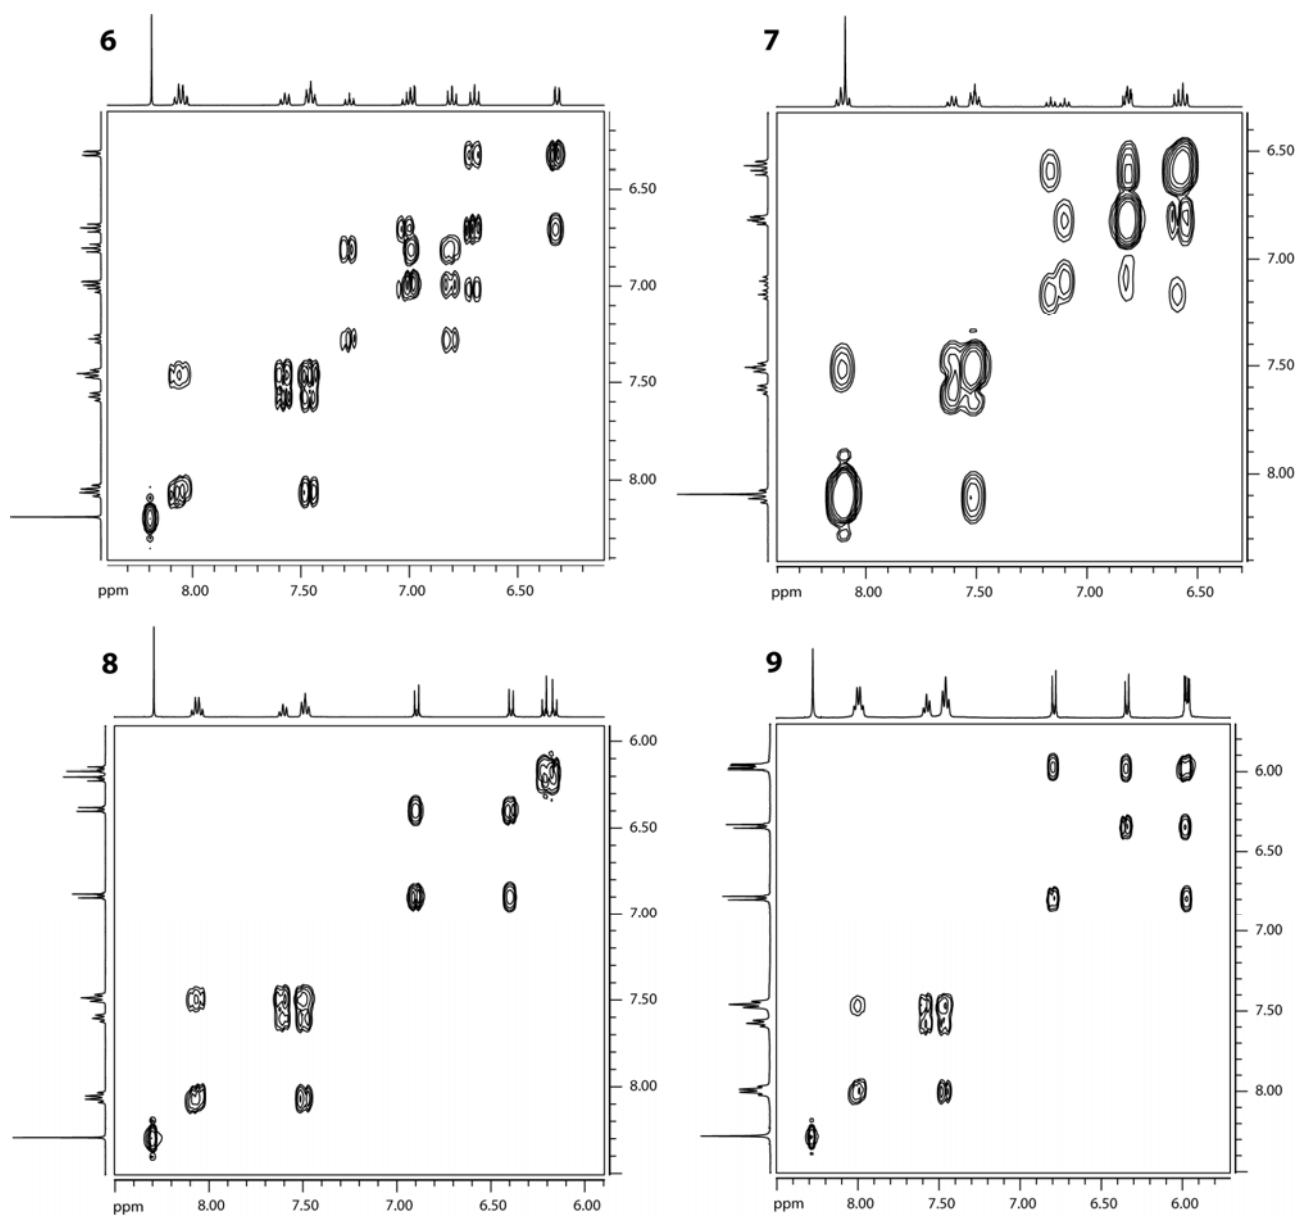

**Figure S5.**  $^1\text{H}$ - $^1\text{H}$  COSY NMR spectra of **6-9** (aromatic region), acetone- $\text{d}_6$ , 298 K.

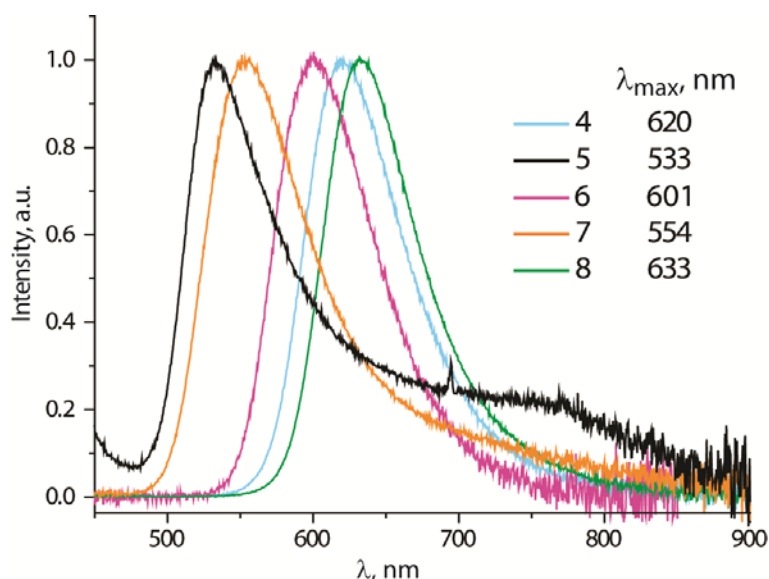

**Figure S6.** Normalized emission spectra of **4–8** in solid state,  $\lambda_{\text{ex}} = 385$  nm, 298 K.

**Table S2.** Selected interatomic distances obtained for the studied complexes at the BP86-DFT level of theory.<sup>a,b</sup>

| Interatomic distance<br>(Å)                      | <b>4</b> | <b>5</b> | <b>6</b>  | <b>7</b>  | <b>8</b>  | <b>9</b>  | <b>10</b> | Cu-<br>analogue<br>of <b>10</b> |
|--------------------------------------------------|----------|----------|-----------|-----------|-----------|-----------|-----------|---------------------------------|
| R(Au <sub>belt</sub> –Au <sub>central</sub> )    | 2.93     | 2.90     | 3.13–3.23 | 2.97      | 3.08      | 2.98      | 2.90      | 4.05                            |
| R(Au <sub>central</sub> –Au <sub>central</sub> ) | 3.54     | 3.95     | 3.29–3.75 | 3.75–4.13 | 3.35–3.71 | 3.36–3.68 | 3.62–4.20 | 3.19–3.69                       |
| R(Au–Cu/Ag)                                      | 2.84     | 2.97     | 2.77–3.06 | 2.88–3.02 | 2.79–2.91 | 2.79–2.95 | 2.84–3.12 | 2.70–2.95                       |

<sup>a</sup> Structure **6** optimized starting from the supplementary crystal structure given above. Corresponding experimental values: R(Au<sub>belt</sub>–Au<sub>central</sub>) = 3.03–3.08 Å; R(Au<sub>central</sub>–Au<sub>central</sub>) = 3.23–3.74 Å; R(Au–Cu/Ag) = 2.76–3.04 Å.

<sup>b</sup> During the structural optimization of the largest  $D_3$ -symmetric complex **10** and its hypothetical Cu-analogue, the two phenyl groups of the centermost [Au(C<sub>2</sub>Ph)<sub>2</sub>] rod were replaced with *tert*-butyl groups to allow optimization in  $D_3$ -symmetry (with the phenyl groups the symmetry is lowered to  $C_{2v}$ ). The bulkiness of a *tert*-butyl group is comparable to a freely rotating phenyl group.

### Optimized Cartesian coordinates of the studied systems in atomic units (BP86 level of theory).

#### [Au<sub>6</sub>Cu<sub>2</sub>(C<sub>2</sub>Ph)<sub>6</sub>(PPh<sub>2</sub>-C<sub>2</sub>-C<sub>2</sub>-PPh<sub>2</sub>)<sub>3</sub>]<sup>2+</sup> (**4**)

|                    |                    |                   |    |
|--------------------|--------------------|-------------------|----|
| 1.92808269193635   | 3.33953718362790   | 0.00000000000000  | au |
| 1.92808269193635   | -3.33953718362790  | 0.00000000000000  | au |
| -3.85616538387261  | 0.00000000000000   | 0.00000000000000  | au |
| 4.69240177854251   | 8.12747828996206   | 0.00000000000000  | au |
| 4.69240177854251   | -8.12747828996206  | 0.00000000000000  | au |
| -9.38480355708483  | 0.00000000000000   | 0.00000000000000  | au |
| 0.00000000000000   | 0.00000000000000   | 3.72629071678020  | cu |
| 0.00000000000000   | 0.00000000000000   | -3.72629071678020 | cu |
| 1.49211828647330   | 11.23451513934270  | -0.02830557189701 | p  |
| 8.98331636663493   | 6.90946991120852   | 0.02830557189701  | p  |
| 1.49211828647330   | -11.23451513934270 | 0.02830557189701  | p  |
| 8.98331636663493   | -6.90946991120852  | -0.02830557189701 | p  |
| -10.47543465310829 | 4.32504522813401   | 0.02830557189701  | p  |

|                    |                    |                    |   |
|--------------------|--------------------|--------------------|---|
| -10.47543465310829 | -4.32504522813401  | -0.02830557189701  | p |
| 2.20997292107077   | 3.28051743145612   | 3.79503132579169   | c |
| 1.73602497266333   | -3.55415140705111  | 3.79503132579169   | c |
| -3.94599789373410  | 0.27363397559492   | 3.79503132579169   | c |
| 1.73602497266333   | 3.55415140705111   | -3.79503132579169  | c |
| -3.94599789373410  | -0.27363397559492  | -3.79503132579169  | c |
| 2.20997292107077   | -3.28051743145612  | -3.79503132579169  | c |
| 2.66829827662185   | 3.68580505795121   | 6.08154246478661   | c |
| 1.85785167527191   | -4.15371662140441  | 6.08154246478661   | c |
| -4.52614995189381  | 0.46791156345316   | 6.08154246478661   | c |
| 1.85785167527191   | 4.15371662140441   | -6.08154246478661  | c |
| -4.52614995189381  | -0.46791156345316  | -6.08154246478661  | c |
| 2.66829827662185   | -3.68580505795121  | -6.08154246478661  | c |
| 3.21322812125090   | 4.14573681667635   | 8.68416191798842   | c |
| 1.25074033169147   | 4.72032680505234   | 10.42879804782449  | c |
| 5.74507420626724   | 4.05094077182757   | 9.58654994139296   | c |
| 1.80889292777635   | 5.17957690757374   | 12.97557414258947  | c |
| 6.28425602497424   | 4.52745491645883   | 12.13643763435618  | c |
| 4.32204627869265   | 5.09106891379936   | 13.84095029991060  | c |
| -5.19692746127162  | 0.70986877281952   | 8.68416191798842   | c |
| -4.71329309318565  | -1.27699050174356  | 10.42879804782449  | c |
| -6.38075472076244  | 2.94990982334033   | 9.58654994139296   | c |
| -5.39009164670228  | -1.02324122560643  | 12.97557414258947  | c |
| -7.06301898462913  | 3.17859790328379   | 12.13643763435618  | c |
| -6.57001815111389  | 1.19746741678012   | 13.84095029991060  | c |
| 1.98369934002065   | -4.85560558949603  | 8.68416191798842   | c |
| 3.46255276149426   | -3.44333630330878  | 10.42879804782449  | c |
| 0.63568051449522   | -7.00085059516780  | 9.58654994139296   | c |
| 3.58119871892594   | -4.15633568196720  | 12.97557414258947  | c |
| 0.77876295965494   | -7.70605281974240  | 12.13643763435618  | c |
| 2.24797187242123   | -6.28853633057949  | 13.84095029991060  | c |
| 1.98369934002065   | 4.85560558949603   | -8.68416191798842  | c |
| 3.46255276149426   | 3.44333630330878   | -10.42879804782449 | c |
| 0.63568051449522   | 7.00085059516780   | -9.58654994139296  | c |
| 3.58119871892594   | 4.15633568196720   | -12.97557414258947 | c |
| 0.77876295965494   | 7.70605281974240   | -12.13643763435618 | c |
| 2.24797187242123   | 6.28853633057949   | -13.84095029991060 | c |
| -5.19692746127162  | -0.70986877281952  | -8.68416191798842  | c |
| -4.71329309318565  | 1.27699050174356   | -10.42879804782449 | c |
| -6.38075472076244  | -2.94990982334033  | -9.58654994139296  | c |
| -5.39009164670228  | 1.02324122560643   | -12.97557414258947 | c |
| -7.06301898462913  | -3.17859790328379  | -12.13643763435618 | c |
| -6.57001815111389  | -1.19746741678012  | -13.84095029991060 | c |
| 3.21322812125090   | -4.14573681667635  | -8.68416191798842  | c |
| 1.25074033169147   | -4.72032680505234  | -10.42879804782449 | c |
| 5.74507420626724   | -4.05094077182757  | -9.58654994139296  | c |
| 1.80889292777635   | -5.17957690757374  | -12.97557414258947 | c |
| 6.28425602497424   | -4.52745491645883  | -12.13643763435618 | c |
| 4.32204627869265   | -5.09106891379936  | -13.84095029991060 | c |
| -1.58036842146621  | -9.98430143531321  | -0.08052850641108  | c |
| -7.85647447128969  | -6.36078991798502  | 0.08052850641108   | c |
| -7.85647447128969  | 6.36078991798502   | -0.08052850641108  | c |
| -1.58036842146621  | 9.98430143531321   | 0.08052850641108   | c |
| 9.43684289275589   | 3.62351151732826   | -0.08052850641108  | c |
| 9.43684289275589   | -3.62351151732826  | 0.08052850641108   | c |
| -12.22336291090439 | 5.29251276118812   | 2.87015553326376   | c |
| -12.34070578873210 | 3.64962160189136   | 4.96562258238321   | c |
| -13.41345383259697 | 7.68158325505665   | 2.96689300597366   | c |
| -13.65246725071345 | 4.39399528650707   | 7.15225534248541   | c |
| -14.72153337554020 | 8.40659325359243   | 5.15602934005821   | c |
| -14.84268351080891 | 6.76549223775579   | 7.24640400332773   | c |
| -12.42454979123184 | -5.23497222633589  | 2.70070847220263   | c |
| -14.96889395196424 | -4.42770715815060  | 2.76222572316177   | c |
| -11.41002868723627 | -6.60672516987272  | 4.74706752495576   | c |
| -16.48998890292287 | -5.02115868506379  | 4.85229153480641   | c |
| -12.94540612218018 | -7.18184410143607  | 6.83660283136214   | c |
| -15.48103290600731 | -6.39668606591193  | 6.89156487020851   | c |
| 1.52823095440998   | -13.23199918111380 | 2.87015553326376   | c |
| 3.00968787292767   | -12.51217551461733 | 4.96562258238321   | c |
| 0.05428067613429   | -15.45718339904706 | 2.96689300597366   | c |
| 3.02092208313254   | -14.02038110670651 | 7.15225534248541   | c |
| 0.08044337087625   | -16.95251851267444 | 5.15602934005821   | c |
| 1.56225360840158   | -16.23688709957083 | 7.24640400332773   | c |
| 10.74589383172877  | -8.14248963662346  | 2.70070847220263   | c |
| 11.31895385545877  | -10.74958884988113 | 2.76222572316177   | c |
| 11.42660617654993  | -6.57801211611945  | 4.74706752495576   | c |
| 12.59344542915959  | -11.77016995552291 | 4.85229153480641   | c |

|                    |                    |                    |   |
|--------------------|--------------------|--------------------|---|
| 12.69236249895327  | -7.62012851339680  | 6.83660283136214   | c |
| 13.28020908611733  | -10.20862474046915 | 6.89156487020851   | c |
| 10.69513195649447  | 7.93948641992569   | 2.87015553326376   | c |
| 9.33101791580452   | 8.86255391272594   | 4.96562258238321   | c |
| 13.35917315646273  | 7.77560014399049   | 2.96689300597366   | c |
| 10.63154516758092  | 9.62638582019937   | 7.15225534248541   | c |
| 14.64109000466399  | 8.54592525908210   | 5.15602934005821   | c |
| 13.28042990240737  | 9.47139486181500   | 7.24640400332773   | c |
| 1.67865595950303   | 13.37746186295933  | 2.70070847220263   | c |
| 3.64994009650548   | 15.17729600803151  | 2.76222572316177   | c |
| -0.01657748931371  | 13.18473728599213  | 4.74706752495576   | c |
| 3.89654347376337   | 16.79132864058668  | 4.85229153480641   | c |
| 0.25304362322724   | 14.80197261483288  | 6.83660283136214   | c |
| 2.20082381988989   | 16.60531080638126  | 6.89156487020851   | c |
| -12.42454979123184 | 5.23497222633589   | -2.70070847220263  | c |
| -14.96889395196424 | 4.42770715815060   | -2.76222572316177  | c |
| -11.41002868723627 | 6.60672516987272   | -4.74706752495576  | c |
| -16.48998890292287 | 5.02115868506379   | -4.85229153480641  | c |
| -12.94540612218018 | 7.18184410143607   | -6.83660283136214  | c |
| -15.48103290600731 | 6.39668606591193   | -6.89156487020851  | c |
| 1.52823095440998   | 13.23199918111380  | -2.87015553326376  | c |
| 3.00968787292767   | 12.51217551461733  | -4.96562258238321  | c |
| 0.05428067613429   | 15.45718339904706  | -2.96689300597366  | c |
| 3.02092208313254   | 14.02038110670651  | -7.15225534248541  | c |
| 0.08044337087625   | 16.95251851267444  | -5.15602934005821  | c |
| 1.56225360840158   | 16.23688709957083  | -7.24640400332773  | c |
| 10.74589383172877  | 8.14248963662346   | -2.70070847220263  | c |
| 11.31895385545877  | 10.74958884988113  | -2.76222572316177  | c |
| 11.42660617654993  | 6.57801211611945   | -4.74706752495576  | c |
| 12.59344542915959  | 11.77016995552291  | -4.85229153480641  | c |
| 12.69236249895327  | 7.62012851339680   | -6.83660283136214  | c |
| 13.28020908611733  | 10.20862474046915  | -6.89156487020851  | c |
| 10.69513195649447  | -7.93948641992569  | -2.87015553326376  | c |
| 13.35917315646273  | -7.77560014399049  | -2.96689300597366  | c |
| 9.33101791580452   | -8.86255391272594  | -4.96562258238321  | c |
| 14.64109000466399  | -8.54592525908210  | -5.15602934005821  | c |
| 10.63154516758092  | -9.62638582019937  | -7.15225534248541  | c |
| 13.28042990240737  | -9.47139486181500  | -7.24640400332773  | c |
| 1.67865595950303   | -13.37746186295933 | -2.70070847220263  | c |
| -0.01657748931371  | -13.18473728599213 | -4.74706752495576  | c |
| 3.64994009650548   | -15.17729600803151 | -2.76222572316177  | c |
| 0.25304362322724   | -14.80197261483288 | -6.83660283136214  | c |
| 3.89654347376337   | -16.79132864058668 | -4.85229153480641  | c |
| 2.20082381988989   | -16.60531080638126 | -6.89156487020851  | c |
| -12.22336291090439 | -5.29251276118812  | -2.87015553326376  | c |
| -12.34070578873210 | -3.64962160189136  | -4.96562258238321  | c |
| -13.41345383259697 | -7.68158325505665  | -2.96689300597366  | c |
| -13.65246725071345 | -4.39399528650707  | -7.15225534248541  | c |
| -14.72153337554020 | -8.40659325359243  | -5.15602934005821  | c |
| -14.84268351080891 | -6.76549223775579  | -7.24640400332773  | c |
| -15.87810308718371 | -7.34322385211337  | -8.95937455695235  | h |
| -0.71787217909521  | 4.77729299135766   | 9.75549240033298   | h |
| 7.27703359999286   | 3.60466803101128   | 8.24949701738372   | h |
| 0.26248377046961   | 5.60693032665689   | 14.30436380431802  | h |
| 8.25669493434233   | 4.45253945488886   | 12.80552767305468  | h |
| 4.75115771100667   | 5.45725916082861   | 15.84659228794769  | h |
| -3.77832100228949  | -3.01034203944539  | 9.75549240033298   | h |
| -6.76025088706190  | 4.49976194628115   | 8.24949701738372   | h |
| -4.98698598536896  | -2.57614755002063  | 14.30436380431802  | h |
| -7.98435974645743  | 4.92423783699421   | 12.80552767305468  | h |
| -7.10170392381625  | 1.38599369470390   | 15.84659228794769  | h |
| 4.49619318138469   | -1.76695095191235  | 9.75549240033298   | h |
| -0.51678271293089  | -8.10442997729240  | 8.24949701738372   | h |
| 4.72450221489943   | -3.03078277663628  | 14.30436380431802  | h |
| -0.27233518788486  | -9.37677729188311  | 12.80552767305468  | h |
| 2.35054621280959   | -6.84325285553243  | 15.84659228794769  | h |
| 4.49619318138469   | 1.76695095191235   | -9.75549240033298  | h |
| -0.51678271293089  | 8.10442997729240   | -8.24949701738372  | h |
| 4.72450221489943   | 3.03078277663628   | -14.30436380431802 | h |
| -0.27233518788486  | 9.37677729188311   | -12.80552767305468 | h |
| 2.35054621280959   | 6.84325285553243   | -15.84659228794769 | h |
| -3.77832100228949  | 3.01034203944539   | -9.75549240033298  | h |
| -6.76025088706190  | -4.49976194628115  | -8.24949701738372  | h |
| -4.98698598536896  | 2.57614755002063   | -14.30436380431802 | h |
| -7.98435974645743  | -4.92423783699421  | -12.80552767305468 | h |
| -7.10170392381625  | -1.38599369470390  | -15.84659228794769 | h |
| -0.71787217909521  | -4.77729299135766  | -9.75549240033298  | h |



|                    |                    |                    |   |
|--------------------|--------------------|--------------------|---|
| 7.27703359999286   | -3.60466803101128  | -8.24949701738372  | h |
| 0.26248377046961   | -5.60693032665689  | -14.30436380431802 | h |
| 8.25669493434233   | -4.45253945488886  | -12.80552767305468 | h |
| 4.75115771100667   | -5.45725916082861  | -15.84659228794769 | h |
| -11.40712599515799 | 1.78697907436174   | 4.88942573808869   | h |
| -13.32834495906697 | 8.97044972940752   | 1.33232914444500   | h |
| -13.74171429798277 | 3.10595937512705   | 8.78581228989277   | h |
| -15.65662447590742 | 10.26643637713505  | 5.23073449157609   | h |
| -15.87810308718371 | 7.34322385211337   | 8.95937455695235   | h |
| -15.77556079593858 | -3.35386465750933  | 1.16771573305062   | h |
| -9.42517325118223  | -7.23557635060186  | 4.70863930503713   | h |
| -18.48062165936900 | -4.40889788384460  | 4.88540627162808   | h |
| -12.15006124582072 | -8.26330385876692  | 8.42917612850386   | h |
| -16.68148564845011 | -6.86251666429768  | 8.52889205845478   | h |
| 4.15599372315060   | -10.77235043315746 | 4.88942573808869   | h |
| -1.10446486950463  | -16.02791018965804 | 1.33232914444500   | h |
| 4.18101742700891   | -13.45365336116437 | 8.78581228989277   | h |
| -1.06268247098192  | -18.69225272221659 | 5.23073449157609   | h |
| 1.57963314198584   | -17.42245256346587 | 8.95937455695235   | h |
| 10.79231239222696  | -11.98510407947404 | 1.16771573305062   | h |
| 10.97877955623433  | -4.54465129529245  | 4.70863930503713   | h |
| 13.05852839978531  | -13.80023889282033 | 4.88540627162808   | h |
| 13.23126168379240  | -6.39060976703406  | 8.42917612850386   | h |
| 14.28385658940083  | -11.01533201227451 | 8.52889205845478   | h |
| 7.25113227200741   | 8.98537135879591   | 4.88942573808869   | h |
| 14.43280982857173  | 7.05746046025048   | 1.33232914444500   | h |
| 9.56069687097382   | 10.34769398603737  | 8.78581228989277   | h |
| 16.71930694688933  | 8.42581634508154   | 5.23073449157609   | h |
| 14.29846994519769  | 10.07922871135268  | 8.95937455695235   | h |
| 4.98324840371156   | 15.33896873698333  | 1.16771573305062   | h |
| -1.55360630505201  | 11.78022764589442  | 4.70863930503713   | h |
| 5.42209325958368   | 18.20913677666484  | 4.88540627162808   | h |
| -1.08120043797178  | 14.65391362580089  | 8.42917612850386   | h |
| 2.39762905904922   | 17.87784867657220  | 8.52889205845478   | h |
| -15.77556079593858 | 3.35386465750933   | -1.16771573305062  | h |
| -9.42517325118223  | 7.23557635060186   | -4.70863930503713  | h |
| -18.48062165936900 | 4.40889788384460   | -4.88540627162808  | h |
| -12.15006124582072 | 8.26330385876692   | -8.42917612850386  | h |
| -16.68148564845011 | 6.86251666429768   | -8.52889205845478  | h |
| 4.15599372315060   | 10.77235043315746  | -4.88942573808869  | h |
| -1.10446486950463  | 16.02791018965804  | -1.33232914444500  | h |
| 4.18101742700891   | 13.45365336116437  | -8.78581228989277  | h |
| -1.06268247098192  | 18.69225272221659  | -5.23073449157609  | h |
| 1.57963314198584   | 17.42245256346587  | -8.95937455695235  | h |
| 10.79231239222696  | 11.98510407947404  | -1.16771573305062  | h |
| 10.97877955623433  | 4.54465129529245   | -4.70863930503713  | h |
| 13.05852839978531  | 13.80023889282033  | -4.88540627162808  | h |
| 13.23126168379240  | 6.39060976703406   | -8.42917612850386  | h |
| 14.28385658940083  | 11.01533201227451  | -8.52889205845478  | h |
| 14.43280982857173  | -7.05746046025048  | -1.33232914444500  | h |
| 7.25113227200741   | -8.98537135879591  | -4.88942573808869  | h |
| 16.71930694688933  | -8.42581634508154  | -5.23073449157609  | h |
| 9.56069687097382   | -10.34769398603737 | -8.78581228989277  | h |
| 14.29846994519769  | -10.07922871135268 | -8.95937455695235  | h |
| -1.55360630505201  | -11.78022764589442 | -4.70863930503713  | h |
| 4.98324840371156   | -15.33896873698333 | -1.16771573305062  | h |
| -1.08120043797178  | -14.65391362580089 | -8.42917612850386  | h |
| 5.42209325958368   | -18.20913677666484 | -4.88540627162808  | h |
| 2.39762905904922   | -17.87784867657220 | -8.52889205845478  | h |
| -11.40712599515799 | -1.78697907436174  | -4.88942573808869  | h |
| -13.32834495906697 | -8.97044972940752  | -1.33232914444500  | h |
| -13.74171429798277 | -3.10595937512705  | -8.78581228989277  | h |
| -15.65662447590742 | -10.26643637713505 | -5.23073449157609  | h |
| 9.43895647624335   | -1.28113051819032  | 0.02353269025405   | c |
| -5.82896981243788  | -7.53381083454733  | 0.02353269025405   | c |
| -3.60998666380539  | 8.81494135273758   | 0.02353269025405   | c |
| -5.82896981243788  | 7.53381083454733   | -0.02353269025405  | c |
| -3.60998666380539  | -8.81494135273758  | -0.02353269025405  | c |
| 9.43895647624335   | 1.28113051819032   | -0.02353269025405  | c |

**[Au<sub>6</sub>Ag<sub>2</sub>(C<sub>2</sub>Ph)<sub>6</sub>(PPh<sub>2</sub>-C<sub>2</sub>-C<sub>2</sub>-PPh<sub>2</sub>)<sub>3</sub>]<sup>2+</sup> (5)**

|                   |                   |                  |    |
|-------------------|-------------------|------------------|----|
| 2.15530783585356  | 3.73310267764970  | 0.00000000000000 | au |
| 2.15530783585356  | -3.73310267764970 | 0.00000000000000 | au |
| -4.31061567170721 | 0.00000000000000  | 0.00000000000000 | au |

|                    |                    |                    |    |
|--------------------|--------------------|--------------------|----|
| 4.88864990496946   | 8.46739001582395   | 0.00000000000000   | au |
| 4.88864990496946   | -8.46739001582395  | 0.00000000000000   | au |
| -9.77729980993896  | 0.00000000000000   | 0.00000000000000   | au |
| 1.47366135131090   | 11.31228431843914  | 0.43000110528343   | p  |
| 9.05989491894523   | 6.93237032603015   | -0.43000110528343  | p  |
| 1.47366135131090   | -11.31228431843914 | -0.43000110528343  | p  |
| 9.05989491894523   | -6.93237032603015  | 0.43000110528343   | p  |
| -10.53355627025607 | 4.37991399240897   | -0.43000110528343  | p  |
| -10.53355627025607 | -4.37991399240897  | 0.43000110528343   | p  |
| 2.58929549685752   | 3.59488704627201   | 3.77130340958947   | c  |
| 1.81861575737841   | -4.03983920131928  | 3.77130340958947   | c  |
| -4.40791125423591  | 0.44495215504721   | 3.77130340958947   | c  |
| 1.81861575737841   | 4.03983920131928   | -3.77130340958947  | c  |
| -4.40791125423591  | -0.44495215504721  | -3.77130340958947  | c  |
| 2.58929549685752   | -3.59488704627201  | -3.77130340958947  | c  |
| 3.09661840292481   | 3.84458345641113   | 6.06657960903543   | c  |
| 1.78119773875901   | -4.60404193096485  | 6.06657960903543   | c  |
| -4.87781614168382  | 0.75945847455371   | 6.06657960903543   | c  |
| 1.78119773875901   | 4.60404193096485   | -6.06657960903543  | c  |
| -4.87781614168382  | -0.75945847455371  | -6.06657960903543  | c  |
| 3.09661840292481   | -3.84458345641113  | -6.06657960903543  | c  |
| 3.71663053588830   | 4.15868844062244   | 8.67680159057692   | c  |
| 1.80028518374439   | 4.59784853608809   | 10.51064020725287  | c  |
| 6.27640463949538   | 4.05611794859344   | 9.49261664062893   | c  |
| 2.43305107595813   | 4.92394441510678   | 13.06232247013425  | c  |
| 6.88892232944275   | 4.39659886115930   | 12.04712564129330  | c  |
| 4.97445430774019   | 4.83086394687724   | 13.84136187702566  | c  |
| -5.45984510394791  | 1.13935224024909   | 8.67680159057692   | c  |
| -4.88199622687759  | -0.73983156486465  | 10.51064020725287  | c  |
| -6.65090350397561  | 3.40746688793688   | 9.49261664062893   | c  |
| -5.48078648828406  | -0.35488816706854  | 13.06232247013425  | c  |
| -7.25202746873512  | 3.76768231141560   | 12.04712564129330  | c  |
| -6.67087805409216  | 1.89257182702927   | 13.84136187702566  | c  |
| 1.74321456805959   | -5.29804068087146  | 8.67680159057692   | c  |
| 3.08171104313317   | -3.85801697122347  | 10.51064020725287  | c  |
| 0.37449886448021   | -7.46358483653023  | 9.49261664062893   | c  |
| 3.04773541232581   | -4.56905624803826  | 13.06232247013425  | c  |
| 0.36310513929236   | -8.16428117257497  | 12.04712564129330  | c  |
| 1.69642374635197   | -6.72343577390658  | 13.84136187702566  | c  |
| 1.74321456805958   | 5.29804068087146   | -8.67680159057692  | c  |
| 3.08171104313317   | 3.85801697122347   | -10.51064020725287 | c  |
| 0.37449886448021   | 7.46358483653023   | -9.49261664062893  | c  |
| 3.04773541232581   | 4.56905624803826   | -13.06232247013425 | c  |
| 0.36310513929236   | 8.16428117257497   | -12.04712564129330 | c  |
| 1.69642374635196   | 6.72343577390658   | -13.84136187702566 | c  |
| -5.45984510394791  | -1.13935224024909  | -8.67680159057692  | c  |
| -4.88199622687759  | 0.73983156486465   | -10.51064020725287 | c  |
| -6.65090350397561  | -3.40746688793688  | -9.49261664062893  | c  |
| -5.48078648828406  | 0.35488816706854   | -13.06232247013425 | c  |
| -7.25202746873512  | -3.76768231141560  | -12.04712564129330 | c  |
| -6.67087805409216  | -1.89257182702927  | -13.84136187702566 | c  |
| 3.71663053588830   | -4.15868844062244  | -8.67680159057692  | c  |
| 1.80028518374439   | -4.59784853608809  | -10.51064020725287 | c  |
| 6.27640463949538   | -4.05611794859344  | -9.49261664062893  | c  |
| 2.43305107595813   | -4.92394441510678  | -13.06232247013425 | c  |
| 6.88892232944275   | -4.39659886115930  | -12.04712564129330 | c  |
| 4.97445430774019   | -4.83086394687724  | -13.84136187702566 | c  |
| -1.51966334606684  | -9.88208841295344  | -0.16046491955550  | c  |
| -7.79830793502804  | -6.25711126937056  | 0.16046491955550   | c  |
| -7.79830793502804  | 6.25711126937056   | -0.16046491955550  | c  |
| -1.51966334606684  | 9.88208841295344   | 0.16046491955550   | c  |
| 9.31797128109494   | 3.62497714358272   | -0.16046491955550  | c  |
| 9.31797128109494   | -3.62497714358272  | 0.16046491955550   | c  |
| -12.72804657870274 | 5.66379803970263   | 1.92834052274216   | c  |
| -14.63151276956206 | 4.06998990767052   | 2.90656899468424   | c  |
| -12.58370555615710 | 8.20799157765494   | 2.72257552612059   | c  |
| -16.39556957858426 | 5.02593671002466   | 4.64314799936397   | c  |
| -14.34823233957402 | 9.14578154266493   | 4.46943197512098   | c  |
| -16.25587797474889 | 7.56129581254423   | 5.42465869260430   | c  |
| -11.79518990108425 | -5.15707056117041  | 3.58123508572608   | c  |
| -10.68202789148793 | -3.98282001507631  | 5.70524481130822   | c  |
| -13.82056372291015 | -6.86153824596215  | 3.89138019901661   | c  |
| -11.59276693995472 | -4.53601427636932  | 8.13485637178443   | c  |
| -14.72490744852521 | -7.39022743681728  | 6.33191704588552   | c  |
| -13.61321793481710 | -6.23464097100936  | 8.44965149062873   | c  |
| 1.45903030506437   | -13.85471069755946 | 1.92834052274216   | c  |
| 3.79104173159212   | -14.70625670807246 | 2.90656899468424   | c  |

|                     |                    |                    |   |
|---------------------|--------------------|--------------------|---|
| -0.81647644221936   | -15.00180447420297 | 2.72257552612059   | c |
| 3.84519592059795    | -16.71194811958160 | 4.64314799936397   | c |
| -0.74636298362373   | -16.99882447680492 | 4.46943197512098   | c |
| 1.57966472818230    | -17.85865119322460 | 5.42465869260430   | c |
| 10.36374906562465   | -7.63639881621546  | 3.58123508572608   | c |
| 8.79023725750121    | -7.25949751042433  | 5.70524481130822   | c |
| 12.85254829149679   | -8.53819015568077  | 3.89138019901661   | c |
| 9.72468706524201    | -7.77162353196856  | 8.13485637178443   | c |
| 13.76257842429116   | -9.05703020038895  | 6.33191704588552   | c |
| 12.20596643177796   | -8.67207207330078  | 8.44965149062873   | c |
| 11.26901627363835   | 8.19091265785683   | 1.92834052274216   | c |
| 10.84047103797003   | 10.63626680040189  | 2.90656899468424   | c |
| 13.40018199837644   | 6.79381289654791   | 2.72257552612059   | c |
| 12.55037365798628   | 11.68601140955695  | 4.64314799936397   | c |
| 15.09459532319769   | 7.85304293414008   | 4.46943197512098   | c |
| 14.67621324656667   | 10.29735538068042  | 5.42465869260430   | c |
| 1.43144083545964    | 12.79346937738588  | 3.58123508572608   | c |
| 1.89179063398677    | 11.24231752550060  | 5.70524481130822   | c |
| 0.96801543141343    | 15.39972840164289  | 3.89138019901661   | c |
| 1.86807987471271    | 12.30763780833778  | 8.13485637178443   | c |
| 0.96232902423414    | 16.44725763720623  | 6.33191704588552   | c |
| 1.40725150303915    | 14.90671304431021  | 8.44965149062873   | c |
| -11.79518990108425  | 5.15707056117041   | -3.58123508572608  | c |
| -10.68202789148793  | 3.98282001507631   | -5.70524481130822  | c |
| -13.82056372291015  | 6.86153824596215   | -3.89138019901661  | c |
| -11.59276693995472  | 4.53601427636932   | -8.13485637178443  | c |
| -14.724907448252521 | 7.39022743681728   | -6.33191704588552  | c |
| -13.61321793481710  | 6.23464097100936   | -8.44965149062873  | c |
| 1.45903030506437    | 13.85471069755946  | -1.92834052274216  | c |
| 3.79104173159212    | 14.70625670807246  | -2.90656899468424  | c |
| -0.81647644221936   | 15.00180447420297  | -2.72257552612059  | c |
| 3.84519592059795    | 16.71194811958160  | -4.64314799936397  | c |
| -0.74636298362373   | 16.99882447680492  | -4.46943197512098  | c |
| 1.57966472818229    | 17.85865119322460  | -5.42465869260430  | c |
| 10.36374906562465   | 7.63639881621546   | -3.58123508572608  | c |
| 8.79023725750121    | 7.25949751042433   | -5.70524481130822  | c |
| 12.85254829149679   | 8.53819015568077   | -3.89138019901661  | c |
| 9.72468706524201    | 7.77162353196856   | -8.13485637178443  | c |
| 13.76257842429116   | 9.05703020038895   | -6.33191704588552  | c |
| 12.20596643177796   | 8.67207207330078   | -8.44965149062873  | c |
| 11.26901627363835   | -8.19091265785683  | -1.92834052274216  | c |
| 13.40018199837644   | -6.79381289654791  | -2.72257552612059  | c |
| 10.84047103797003   | -10.63626680040189 | -2.90656899468424  | c |
| 15.09459532319769   | -7.85304293414007  | -4.46943197512098  | c |
| 12.55037365798628   | -11.68601140955695 | -4.64314799936397  | c |
| 14.67621324656667   | -10.29735538068042 | -5.42465869260430  | c |
| 1.43144083545964    | -12.79346937738588 | -3.58123508572608  | c |
| 0.96801543141343    | -15.39972840164289 | -3.89138019901661  | c |
| 1.89179063398677    | -11.24231752550060 | -5.70524481130822  | c |
| 0.96232902423414    | -16.44725763720623 | -6.33191704588552  | c |
| 1.86807987471271    | -12.30763780833778 | -8.13485637178443  | c |
| 1.40725150303915    | -14.90671304431018 | -8.44965149062873  | c |
| -12.72804657870274  | -5.66379803970263  | -1.92834052274216  | c |
| -14.63151276956206  | -4.06998990767052  | -2.90656899468424  | c |
| -12.58370555615710  | -8.20799157765494  | -2.72257552612059  | c |
| -16.39556957858426  | -5.02593671002466  | -4.64314799936397  | c |
| -14.34823233957402  | -9.14578154266493  | -4.46943197512098  | c |
| -16.25587797474889  | -7.56129581254423  | -5.42465869260430  | c |
| -17.63629773138166  | -8.30507810515300  | -6.79601301019865  | h |
| -0.19001389389245   | 4.66008897044442   | 9.90320987946143   | h |
| 7.77123870100966    | 3.71549004445892   | 8.08460896126146   | h |
| 0.92348393953322    | 5.24844203992147   | 14.46112756484273  | h |
| 8.88277962737721    | 4.32184667330138   | 12.64822538757528  | h |
| 5.46356422156426    | 5.09428347099188   | 15.84939383341123  | h |
| -3.94074848535433   | -2.49460134440506  | 9.90320987946143   | h |
| -7.10332811651446   | 4.87234511171767   | 8.08460896126146   | h |
| -5.00702610662883   | -1.82446046833801  | 14.46112756484273  | h |
| -8.18421882402886   | 5.53178947687686   | 12.64822538757528  | h |
| -7.14356101074023   | 2.18444367558651   | 15.84939383341123  | h |
| 4.13076237924678    | -2.16548762603937  | 9.90320987946143   | h |
| -0.66791058449522   | -8.58783515617667  | 8.08460896126146   | h |
| 4.08354216709555    | -3.42398157158341  | 14.46112756484273  | h |
| -0.69856080334832   | -9.85363615017831  | 12.64822538757528  | h |
| 1.67999678917593    | -7.27872714657838  | 15.84939383341123  | h |
| 4.13076237924678    | 2.16548762603937   | -9.90320987946143  | h |
| -0.66791058449522   | 8.58783515617667   | -8.08460896126146  | h |
| 4.08354216709555    | 3.42398157158341   | -14.46112756484273 | h |

|                    |                    |                    |   |
|--------------------|--------------------|--------------------|---|
| -0.69856080334832  | 9.85363615017831   | -12.64822538757528 | h |
| 1.67999678917593   | 7.27872714657838   | -15.84939383341123 | h |
| -3.94074848535433  | 2.49460134440506   | -9.90320987946143  | h |
| -7.10332811651446  | -4.87234511171767  | -8.08460896126146  | h |
| -5.00702610662883  | 1.82446046833801   | -14.46112756484273 | h |
| -8.18421882402886  | -5.53178947687686  | -12.64822538757528 | h |
| -7.14356101074023  | -2.18444367558651  | -15.84939383341123 | h |
| -0.19001389389245  | -4.66008897044442  | -9.90320987946143  | h |
| 7.77123870100966   | -3.71549004445892  | -8.08460896126146  | h |
| 0.92348393953322   | -5.24844203992147  | -14.46112756484273 | h |
| 8.88277962737721   | -4.32184667330138  | -12.64822538757528 | h |
| 5.46356422156426   | -5.09428347099188  | -15.84939383341123 | h |
| -14.72087998719362 | 2.07013352895508   | 2.32220595668930   | h |
| -11.08781969440479 | 9.45520382961213   | 1.98329811295985   | h |
| -17.87777282287881 | 3.77548727321036   | 5.40257549198430   | h |
| -14.22995688753406 | 11.13110454272712  | 5.08880356061527   | h |
| -17.63629773138166 | 8.30507810515300   | 6.79601301019865   | h |
| -9.10025141301020  | -2.64235970320134  | 5.46862513246615   | h |
| -14.70298596750135 | -7.77048788345362  | 2.23876703052801   | h |
| -10.71900948993053 | -3.61893128274680  | 9.78803818752303   | h |
| -16.31337125986162 | -8.71590907516786  | 6.57438411602766   | h |
| -14.33250589943655 | -6.65493215173151  | 10.35918164181087  | h |
| 5.56765176829581   | -13.78372279944917 | 2.32220595668930   | h |
| -2.64453686720165  | -14.32993544274200 | 1.98329811295985   | h |
| 5.66921852117445   | -17.37034906430530 | 5.40257549198430   | h |
| -2.52484086241507  | -17.88905643072538 | 5.08880356061527   | h |
| 1.62574024621437   | -19.42602091665885 | 6.79601301019865   | h |
| 6.83847633541377   | -6.55986905289140  | 5.46862513246615   | h |
| 14.08093289062073  | -8.84791541761547  | 2.23876703052801   | h |
| 8.49359117037420   | -7.47346888031294  | 9.78803818752303   | h |
| 15.70488430610153  | -9.76983939482317  | 6.57438411602766   | h |
| 12.92959325357959  | -9.08484813293659  | 10.35918164181087  | h |
| 9.15322821889787   | 11.71358927049405  | 2.32220595668930   | h |
| 13.73235656160648  | 4.87473161312989   | 1.98329811295985   | h |
| 12.20855430170442  | 13.59486179109489  | 5.40257549198430   | h |
| 16.75479774994908  | 6.75795188799829   | 5.08880356061527   | h |
| 16.01055748516729  | 11.12094281150581  | 6.79601301019865   | h |
| 2.26177507759650   | 9.20222875609277   | 5.46862513246615   | h |
| 0.62205307688064   | 16.61840330106909  | 2.23876703052801   | h |
| 2.22541831955637   | 11.09240016305971  | 9.78803818752303   | h |
| 0.60848695376010   | 18.48574846999101  | 6.57438411602766   | h |
| 1.40291264585691   | 15.73978028466812  | 10.35918164181087  | h |
| -9.10025141301020  | 2.64235970320134   | -5.46862513246615  | h |
| -14.70298596750135 | 7.77048788345362   | -2.23876703052801  | h |
| -10.71900948993053 | 3.61893128274680   | -9.78803818752303  | h |
| -16.31337125986162 | 8.71590907516786   | -6.57438411602766  | h |
| -14.33250589943655 | 6.65493215173151   | -10.35918164181087 | h |
| 5.56765176829581   | 13.78372279944917  | -2.32220595668930  | h |
| -2.64453686720165  | 14.32993544274200  | -1.98329811295985  | h |
| 5.66921852117445   | 17.37034906430530  | -5.40257549198430  | h |
| -2.52484086241507  | 17.88905643072538  | -5.08880356061527  | h |
| 1.62574024621437   | 19.42602091665885  | -6.79601301019865  | h |
| 6.83847633541377   | 6.55986905289140   | -5.46862513246615  | h |
| 14.08093289062073  | 8.84791541761547   | -2.23876703052801  | h |
| 8.49359117037420   | 7.47346888031294   | -9.78803818752303  | h |
| 15.70488430610153  | 9.76983939482317   | -6.57438411602766  | h |
| 12.92959325357959  | 9.08484813293659   | -10.35918164181087 | h |
| 13.73235656160648  | -4.87473161312989  | -1.98329811295985  | h |
| 9.15322821889787   | -11.71358927049405 | -2.32220595668930  | h |
| 16.75479774994908  | -6.75795188799829  | -5.08880356061527  | h |
| 12.20855430170442  | -13.59486179109489 | -5.40257549198430  | h |
| 16.01055748516729  | -11.12094281150581 | -6.79601301019865  | h |
| 0.62205307688064   | -16.61840330106909 | -2.23876703052801  | h |
| 2.26177507759650   | -9.20222875609277  | -5.46862513246615  | h |
| 0.60848695376010   | -18.48574846999101 | -6.57438411602766  | h |
| 2.22541831955637   | -11.09240016305971 | -9.78803818752303  | h |
| 1.40291264585691   | -15.73978028466812 | -10.35918164181087 | h |
| -14.72087998719362 | -2.07013352895508  | -2.32220595668930  | h |
| -11.08781969440479 | -9.45520382961213  | -1.98329811295985  | h |
| -17.87777282287881 | -3.77548727321036  | -5.40257549198430  | h |
| -14.22995688753406 | -11.13110454272712 | -5.08880356061527  | h |
| 9.28906961112770   | -1.28233388597755  | 0.06171367627697   | c |
| -5.75506852695408  | -7.40340331776977  | 0.06171367627697   | c |
| -3.53400108417366  | 8.68573720374742   | 0.06171367627697   | c |
| -5.75506852695408  | 7.40340331776977   | -0.06171367627697  | c |
| -3.53400108417366  | -8.68573720374742  | -0.06171367627697  | c |
| 9.28906961112770   | 1.28233388597755   | -0.06171367627697  | c |

|                    |                    |                   |    |
|--------------------|--------------------|-------------------|----|
| 0.0000000000000000 | 0.0000000000000000 | -3.58017019901180 | ag |
| 0.0000000000000000 | 0.0000000000000000 | 3.58017019901180  | ag |

**[Au<sub>9</sub>Cu<sub>6</sub>(C<sub>2</sub>Ph)<sub>12</sub>(PPh<sub>2</sub>-C<sub>2</sub>-C<sub>6</sub>H<sub>4</sub>-C<sub>2</sub>-PPh<sub>2</sub>)<sub>3</sub>]<sup>3+</sup> (6)**

|                    |                    |                    |    |
|--------------------|--------------------|--------------------|----|
| -11.17840617269061 | -8.32899939483191  | -0.25750834386766  | au |
| -1.33487169014098  | 13.82600412265165  | 0.33744197657289   | au |
| 12.83280601816494  | -5.87088113812766  | -0.28107518973277  | au |
| -6.44863420535321  | -4.73288466933477  | 0.23024816769688   | au |
| -0.75607058520573  | 7.94850412630735   | 0.00465147217409   | au |
| 7.29600139046086   | -3.32038555529584  | -0.06210488111608  | au |
| -3.37435832965185  | 1.53587399267681   | 0.18484593119340   | au |
| 2.82451041245772   | 2.17352687799670   | -0.06668276176741  | au |
| 0.28866432609753   | -3.49174720335681  | 0.06944304765574   | au |
| -0.02380893158586  | 4.31159069837370   | 3.81101818162632   | cu |
| 3.70223089043091   | -2.06710089619107  | 3.76917503216523   | cu |
| -3.64757353280797  | -2.07949378844178  | 3.90634972842624   | cu |
| -1.00042839556849  | 4.19202274066170   | -3.63881699694558  | cu |
| 3.94635452140238   | -1.36183726637209  | -3.77695728402302  | cu |
| -3.37623836819268  | -2.72978711417877  | -3.63888290077448  | cu |
| -14.22182025486093 | -5.50315548120696  | -1.89193056179432  | p  |
| -5.56857556298812  | 14.22909008201228  | 1.70140880965166   | p  |
| 2.75857553936881   | 15.22721268967586  | -0.77580875166959  | p  |
| 15.25949766653030  | -2.56249799792922  | 1.47251094729670   | p  |
| 11.94563555641659  | -9.87223139398731  | -2.04603202286274  | p  |
| -9.51869601702482  | -12.21585156725091 | 1.17986130674092   | p  |
| -17.28396467839014 | -5.83830786926877  | -0.27201410276084  | c  |
| -19.51838672838623 | -4.95106310412917  | -1.43188457718449  | c  |
| -19.45646975482570 | -4.10702290739309  | -3.33557366996287  | h  |
| -21.83456438321936 | -5.16176947958929  | -0.15685377525231  | c  |
| -23.57808526517377 | -4.47441461674460  | -1.06589761696667  | h  |
| -21.93324935133867 | -6.24943430528617  | 2.26759207550677   | c  |
| -23.75874307121395 | -6.41866598934719  | 3.25668852558485   | h  |
| -19.71026223116656 | -7.12904477025947  | 3.42423060209647   | c  |
| -19.78519185377681 | -7.98924512573916  | 5.31970147016962   | h  |
| -17.38392612780834 | -6.92769154355845  | 2.15945800544120   | c  |
| -15.63881539686205 | -7.62543642860758  | 3.06418212761462   | h  |
| -14.85628224043493 | -6.04779096448022  | -5.26163838200811  | c  |
| -14.46991327766687 | -4.15257716526479  | -7.09308252848834  | c  |
| -13.76075107952398 | -2.27913769450347  | -6.52484132147702  | h  |
| -15.00347953893213 | -4.65997839680158  | -9.64638237920504  | c  |
| -14.70960482981885 | -3.17027307657248  | -11.07189618188503 | h  |
| -15.91963124816689 | -7.04388786683380  | -10.37427818927842 | h  |
| -16.35682108333620 | -7.42730067969397  | -12.37472001732989 | c  |
| -16.28651316972083 | -8.94178399499109  | -8.54737296317989  | c  |
| -17.00109946245951 | -10.81502167944881 | -9.11141042389609  | h  |
| -15.74905869522078 | -8.45510437731935  | -5.99688521339113  | c  |
| -16.04181240707969 | -9.95321603473950  | -4.57643653314534  | h  |
| -13.44195735636807 | -2.29588666831157  | -1.62258321929471  | c  |
| -12.77352812907492 | -0.10690423950766  | -1.17528679462068  | c  |
| -11.86473658101518 | 2.36062308838699   | -0.61245448470575  | c  |
| -10.04139772824764 | 2.65487995195347   | 1.33597405660543   | c  |
| -9.40787595098373  | 0.98340353943518   | 2.40356175397789   | h  |
| -9.01832154220273  | 5.02669621005064   | 1.85349359732289   | c  |
| -7.57361734467981  | 5.23502919058784   | 3.33387038210631   | h  |
| -9.78081204970719  | 7.17495716867720   | 0.43745088505412   | c  |
| -11.65816722051842 | 6.89503619635321   | -1.46177672960596  | c  |
| -12.28805447845163 | 8.56185402873170   | -2.53607800043886  | h  |
| -12.68540712927359 | 4.51987360778672   | -1.97990029884121  | c  |
| -14.12549912917498 | 4.30723771131231   | -3.46639841349458  | h  |
| -8.58357368640277  | 9.53608120789242   | 0.90275515038534   | c  |
| -7.44541343475418  | 11.52235678698792  | 1.34650920973139   | c  |
| -7.27389100361407  | 16.74318987888357  | 0.01342114440224   | c  |
| -6.19029250045624  | 17.90145345629044  | -2.12764900379995  | c  |
| -4.30270989813406  | 17.31115110186621  | -2.78938459455739  | h  |
| -7.51748442747040  | 19.80972108573815  | -3.41420108050162  | c  |
| -6.66434669390879  | 20.71540900691145  | -5.08440279908032  | h  |
| -9.91907289374783  | 20.56010059500843  | -2.56771966592303  | c  |
| -10.95467675955788 | 22.06284003579571  | -3.57211354803509  | h  |
| -11.00426464434964 | 19.40177679929137  | -0.43270362770347  | c  |
| -12.88728247421530 | 19.99311142798622  | 0.23313295575596   | h  |
| -9.69170932271777  | 17.49669562552830  | 0.86211486727225   | c  |
| -10.54761994273748 | 16.60265597746933  | 2.53827926103658   | h  |
| -5.75283861161921  | 15.04717563213510  | 5.07616430969772   | c  |
| -6.65662858064312  | 13.31967687271284  | 6.89096118340641   | c  |

|                   |                    |                    |   |
|-------------------|--------------------|--------------------|---|
| -7.31852193756676 | 11.43451809731901  | 6.30513204225176   | h |
| -6.73105308470760 | 14.02008661546483  | 9.45287154056305   | c |
| -7.45519027667149 | 12.67032793185884  | 10.86403111693393  | h |
| -5.90946942954150 | 16.43056220240267  | 10.20612528961295  | c |
| -5.99195240912608 | 16.98142495945176  | 12.21348780922530  | h |
| -4.99330904902309 | 18.14813427473559  | 8.39472377020409   | c |
| -4.35127911716774 | 20.04200772021651  | 8.97697669499552   | h |
| -4.90368158959680 | 17.46196660078330  | 5.83466207867979   | c |
| -4.19110947812725 | 18.82344441735164  | 4.42611956731215   | h |
| 3.67213374207563  | 17.95952315873545  | 1.16407572747768   | c |
| 5.72841490841443  | 17.86670560145057  | 2.85372099147143   | c |
| 6.86341450602755  | 16.12951512758703  | 3.02394177569311   | h |
| 6.33135525910058  | 20.00108797375706  | 4.31653080537973   | c |
| 7.94579772182202  | 19.92522407011159  | 5.63049551881074   | h |
| 4.89541721221621  | 22.22289049792450  | 4.09742439790801   | c |
| 5.38216457372563  | 23.89615456075985  | 5.23842152756640   | h |
| 2.83801053483735  | 22.31467437271257  | 2.41476245134939   | c |
| 1.71279688808236  | 24.05798656331112  | 2.23169216641478   | h |
| 2.21487189049012  | 20.18898963184690  | 0.95765363113786   | c |
| 0.60114635847174  | 20.27768781516367  | -0.36033817055271  | h |
| 2.98207244287413  | 16.27069422727066  | -4.08363695411297  | c |
| 4.91453097803593  | 17.95361278565843  | -4.83130808659234  | c |
| 6.28470081779512  | 18.67373366386635  | -3.43716208881761  | h |
| 5.07630417087296  | 18.72599518139785  | -7.36323752081337  | c |
| 6.57931790804337  | 20.04587328673577  | -7.94437686779341  | h |
| 3.32131120366070  | 17.82931484908914  | -9.14856006879641  | c |
| 3.44868616420481  | 18.45429228681079  | -11.13183810469768 | h |
| 1.40389312610136  | 16.14880325236658  | -8.40547823908174  | c |
| 0.02108600547417  | 15.44556939062124  | -9.79521572427632  | h |
| 1.22885369937850  | 15.36195091943736  | -5.87463780783082  | c |
| -0.26942822891097 | 14.03026800718618  | -5.29723395430656  | h |
| 5.17183095621664  | 12.99618764204950  | -0.36951847022261  | c |
| 6.66130152267741  | 11.21672098221189  | -0.14464762229378  | c |
| 8.28764033346743  | 9.08883001021690   | 0.08085092681344   | c |
| 10.38869050134041 | 9.09207418505473   | 1.75256231147886   | c |
| 10.82025103427307 | 10.80198326161987  | 2.85619596663668   | h |
| 11.88633048892670 | 6.93528101757334   | 2.01364843147765   | c |
| 13.50360380336522 | 6.94002575278355   | 3.32274273331377   | h |
| 11.32422304631769 | 4.71566553116828   | 0.61119796693663   | c |
| 9.25258199523473  | 4.73004758853270   | -1.09729344249193  | c |
| 8.81147374428024  | 3.00997224640551   | -2.18484388254641  | h |
| 7.75942125845822  | 6.88527144047097   | -1.35909546149741  | c |
| 6.13437717366186  | 6.87318239461954   | -2.65697873991947  | h |
| 12.75692821448648 | 2.45913542145813   | 0.91853411034247   | c |
| 13.93138904787442 | 0.45635514146974   | 1.14440750660696   | c |
| 18.36467115095632 | -2.38969896411318  | -0.07855137182349  | c |
| 19.17570324245349 | -0.21121896554483  | -1.37878134077722  | c |
| 17.94789731428811 | 1.46863381193610   | -1.47174891597232  | h |
| 21.56199548863721 | -0.18395414599294  | -2.54720105334548  | c |
| 22.19516343222649 | 1.52518214533776   | -3.55559760152157  | h |
| 23.13792358347251 | -2.31611640325076  | -2.41978244384203  | c |
| 25.01020268734326 | -2.28542873108436  | -3.33189989336069  | h |
| 22.32774163417443 | -4.49182127405161  | -1.12257982577296  | c |
| 23.56461483093564 | -6.16425514727744  | -1.01398922450554  | h |
| 19.94477001161038 | -4.54039426569924  | 0.03890176063807   | c |
| 19.32392822627383 | -6.25176681730538  | 1.05672272221831   | h |
| 15.90098441829000 | -2.97999066364623  | 4.86259486400738   | c |
| 18.03604578451074 | -1.83072412614899  | 5.97907812281656   | c |
| 19.34547858661867 | -0.69170037989996  | 4.82673793829296   | h |
| 18.50591898767803 | -2.16895512313189  | 8.56773459044384   | c |
| 20.18161867037185 | -1.28663293106298  | 9.43548675053231   | h |
| 16.85826346945793 | -3.64671458196103  | 10.04240380546662  | c |
| 17.24969383914724 | -3.92545879719532  | 12.06973387057563  | h |
| 14.72937348682842 | -4.78280027585471  | 8.93201374115201   | c |
| 13.43859162011837 | -5.94782361746829  | 10.07812302663659  | h |
| 14.24367974495217 | -4.45497909327015  | 6.34137381854785   | c |
| 12.57118181229311 | -5.34837858737089  | 5.47393993514435   | h |
| 12.52404601048883 | -10.04468116865723 | -5.46583968997506  | c |
| 12.52807853668687 | -7.80659601152896  | -6.91427861977491  | c |
| 12.18845891119766 | -5.96263208312737  | -6.00220871791247  | h |
| 12.96458827696506 | -7.93211703525195  | -9.53120592857752  | c |
| 12.97629519512084 | -6.17858873786209  | -10.65427587102807 | h |
| 13.39781121521806 | -10.27854431175855 | -10.69747827469521 | c |
| 13.76224224101567 | -10.37162917252672 | -12.74669936647698 | h |
| 13.38516675354922 | -12.51182965299591 | -9.25287562267013  | c |
| 13.73338033179944 | -14.35156928564852 | -10.16590168536495 | h |
| 12.94878650648638 | -12.40510809942979 | -6.63905036528711  | c |

|                    |                    |                    |   |
|--------------------|--------------------|--------------------|---|
| 12.96056760127561  | -14.15768235202182 | -5.51273037840039  | h |
| 13.97499372762536  | -12.29218736945674 | -0.59504619476794  | c |
| 16.60679135898084  | -12.16031758381881 | -1.03272821772396  | c |
| 17.39953011211524  | -10.67570829010440 | -2.26411077183468  | h |
| 18.21995431240694  | -13.94737395692239 | 0.07910179530706   | c |
| 20.26910078217155  | -13.85628946549024 | -0.28355869743937  | h |
| 17.22638582205642  | -15.85346404963373 | 1.64486982851711   | c |
| 18.49900298153754  | -17.25337843872933 | 2.51600425599148   | h |
| 14.61220072250064  | -15.97533010738032 | 2.09002189323087   | c |
| 13.82818057516166  | -17.47106100196350 | 3.30941052237787   | h |
| 12.97963033184290  | -14.20182489649056 | 0.97280802296511   | c |
| 10.92790857615816  | -14.31196652543942 | 1.31319674464432   | h |
| 8.83728742933997   | -10.92127670721118 | -1.57638101580252  | c |
| 6.57612382234972   | -11.39287006552256 | -1.25401296758210  | c |
| 3.95251682512692   | -11.80980629294164 | -0.82810531617907  | c |
| 2.61945479826196   | -10.13459297148940 | 0.79262092049528   | c |
| 3.64102535671997   | -8.57800226404857  | 1.72536375361117   | h |
| 0.02951439933966   | -10.43003281132525 | 1.16762894936464   | h |
| -0.99537746475915  | -9.09679028293368  | 2.39077985063435   | c |
| -1.30935646337249  | -12.40765800407203 | -0.05849195044463  | c |
| 0.03085526355426   | -14.11252535091168 | -1.64133278126617  | c |
| -0.99079799316384  | -15.66078277951063 | -2.58336653350921  | h |
| 2.62604564888515   | -13.81628981983124 | -2.02150775678937  | c |
| 3.65523834052296   | -15.13281015844230 | -3.26140445330201  | h |
| -3.96800397891245  | -12.58643057164214 | 0.29948162643517   | c |
| -6.27328238685505  | -12.62151538063319 | 0.65055217438187   | c |
| -11.07749835227205 | -14.86706220212196 | -0.430332706979632 | c |
| -9.71422430931948  | -16.65354681880857 | -1.85982530266939  | c |
| -7.64499121492268  | -16.49583273538887 | -2.03031999563658  | h |
| -11.00301438409765 | -18.64131030086978 | -3.06285217295902  | c |
| -9.93144779737086  | -20.03839306030647 | -4.17575792695227  | h |
| -13.63956745595219 | -18.85557642172793 | -2.83958000668952  | c |
| -14.64107690086830 | -20.42265477774755 | -3.77754851767979  | h |
| -15.00238512769194 | -17.07081020061571 | -1.41457896612017  | c |
| -17.07040240179622 | -17.23751085650784 | -1.22963929137056  | h |
| -13.73316230521739 | -15.07215412969779 | -0.22073253060143  | c |
| -14.81540589965108 | -13.67910620326815 | 0.89192351157860   | h |
| -9.99834423499161  | -12.72420144114358 | 4.58725359795518   | c |
| -10.15713149324714 | -15.19828024509225 | 5.57495633945821   | c |
| -10.02028159509445 | -16.85017149483442 | 4.31332763147784   | h |
| -10.51416099627516 | -15.55161965125864 | 8.17985110779516   | c |
| -10.65220483556598 | -17.48273689125372 | 8.94846164960500   | h |
| -10.71079912931669 | -13.45144523077582 | 9.79879919338237   | c |
| -11.01116203219249 | -13.74085263520436 | 11.84012052449619  | h |
| -10.54133081616318 | -10.98884442652578 | 8.81619182310625   | c |
| -10.69939378096290 | -9.33775691667149  | 10.07598587458261  | h |
| -10.18707760937215 | -10.61643159220644 | 6.20996014525371   | c |
| -10.05018872888854 | -8.68051488189935  | 5.44461492680469   | h |
| -7.20294039383534  | -3.72097883123383  | 3.83159212576908   | c |
| -8.22033368602254  | -3.34652809920212  | 5.93855299595055   | c |
| -9.50389587897658  | -2.93474319004190  | 8.27915069786469   | c |
| -11.93788264381440 | -1.78976197736391  | 8.29236038911603   | c |
| -12.80154813275501 | -1.21796564980672  | 6.48644170029063   | h |
| -13.23496353918175 | -1.41699694803616  | 10.57154648750110  | c |
| -15.12691137730149 | -0.54451241030455  | 10.55029123142225  | h |
| -12.13319814123905 | -2.15343737923450  | 12.87759727107626  | c |
| -13.15808985667425 | -1.85681255134703  | 14.66695134573864  | h |
| -9.72144045601731  | -3.27507201845719  | 12.89034097505326  | c |
| -8.85001577198020  | -3.85079265583125  | 14.69276290035854  | h |
| -8.41353945902883  | -3.67353846761668  | 10.62191882074202  | c |
| -6.52919234165666  | -4.55684475881658  | 10.63283067739629  | h |
| -3.24878146502130  | 1.85804507763675   | 4.04021814193466   | c |
| -3.28587632510555  | 3.08418751082696   | 6.11153175928976   | c |
| -3.98588078689663  | 4.03086545001744   | 8.55470536602629   | c |
| -2.28240679479526  | 5.43967374323752   | 10.07571310971794  | c |
| -0.37539405503351  | 5.85255992836688   | 9.35285828008952   | h |
| -3.02607008791339  | 6.32290340590509   | 12.45977058090576  | c |
| -1.68076869534994  | 7.41730836323232   | 13.61297438372526  | h |
| -5.47118345703737  | 5.81894801000970   | 13.37392703869216  | c |
| -6.04598535359588  | 6.50512003893604   | 15.25526263434154  | h |
| -7.18094864147724  | 4.43048332784668   | 11.88137840138125  | c |
| -9.09756557210163  | 4.02300894605802   | 12.58743270448266  | h |
| -6.45932188027702  | 3.54542111675656   | 9.49390322557824   | c |
| -7.79504443336446  | 2.44555575198545   | 8.33804031665713   | h |
| 0.56837851307182   | 8.16222717998663   | 3.57914646515663   | c |
| 1.56565607631009   | 9.03139314227794   | 5.54355497000405   | c |
| 2.68705014697865   | 10.05669960348168  | 7.77248521960007   | c |

|                   |                    |                    |   |
|-------------------|--------------------|--------------------|---|
| 5.18102754099754  | 9.36917484357853   | 8.50270825024069   | c |
| 6.23476962933190  | 8.00329242881687   | 7.33831718606353   | h |
| 6.27472596045685  | 10.40855132291374  | 10.67864847637606  | c |
| 8.20436057169223  | 9.85026935378585   | 11.23054232486219  | h |
| 4.92384733862575  | 12.16041412319024  | 12.15507215206277  | c |
| 5.79554053309743  | 12.98211110829681  | 13.85957570693708  | h |
| 2.45717814133102  | 12.86114636836797  | 11.45007257632334  | c |
| 1.39600719226897  | 14.23729178393580  | 12.59913721005645  | h |
| 1.33508584983873  | 11.81737529198148  | 9.29002804640436   | c |
| -0.59804727301232 | 12.35744414343721  | 8.73891614511412   | h |
| 3.30144992404817  | 1.95632789893365   | 3.74681175111652   | c |
| 4.49256274463245  | 1.60779209900861   | 5.79280969198176   | c |
| 5.82125563800951  | 1.67910240003925   | 8.15550046062707   | c |
| 8.50586145896690  | 1.60459732268023   | 8.19128082383927   | c |
| 9.54108820954080  | 1.43922607479872   | 6.39423458387946   | h |
| 9.81285208550123  | 1.72866444074002   | 10.49241162238727  | c |
| 11.89478708639831 | 1.66936601050273   | 10.49456763161515  | h |
| 8.48195832767577  | 1.92511919871184   | 12.78729768778201  | c |
| 9.5182607576994   | 2.03088109786668   | 14.59134286420001  | h |
| 5.82389380360170  | 1.98979252833422   | 12.77181466685779  | c |
| 4.77369567285958  | 2.15099069960884   | 14.56357997101163  | h |
| 4.49590897352740  | 1.86011626984642   | 10.48299855669670  | h |
| 2.4155887361681   | 1.93238145681840   | 10.46811679606790  | c |
| 6.78068114568190  | -4.50262439967807  | 3.51502320726523   | c |
| 6.74580993019614  | -5.50653224095702  | 5.66101544842022   | c |
| 6.79565446483568  | -6.77627020671056  | 8.04714692285322   | c |
| 6.31494883361685  | -9.41716949184944  | 8.179332684941424  | c |
| 5.86532410792767  | -10.45438288746765 | 6.43185584761670   | h |
| 6.42420317075929  | -10.68831611689908 | 10.49912782922300  | c |
| 6.05683338435335  | -12.73767729383201 | 10.57157601702003  | h |
| 6.99692405798019  | -9.35972040878672  | 12.729744478520930 | h |
| 7.07984863363770  | -10.36583750730259 | 14.55201768937410  | h |
| 7.46297035532943  | -6.74361661463757  | 12.62698905017897  | c |
| 7.90862253631757  | -5.69551801722292  | 14.37161166866652  | h |
| 7.37108341565842  | -5.45505090000646  | 10.31472787347612  | c |
| 7.74572603407427  | -3.40948407544983  | 10.23183170504304  | h |
| 0.03737722155635  | -3.75330129023275  | 3.91542606441209   | c |
| -0.73831780270060 | -4.55691807015940  | 6.03045110844867   | c |
| -1.28854810432419 | -5.61814164502403  | 8.46044432058628   | c |
| -0.53432834468469 | -4.36726796524534  | 10.71321190685337  | c |
| 0.47566049561769  | -2.55367318176329  | 10.57732069908404  | h |
| -1.04302742335132 | -5.44882511460682  | 13.07605569631321  | c |
| -0.42945610232120 | -4.47031055612111  | 14.80929777883705  | h |
| -2.31776962877215 | -7.77654077023524  | 13.24199649733116  | c |
| -2.70598283777762 | -8.62339199654859  | 15.10530757137387  | h |
| -3.08893734361487 | -9.02340675899182  | 11.02326432608648  | c |
| -4.09023416473419 | -10.84577716760065 | 11.14078518208712  | h |
| -2.58658290088089 | -7.96238319959852  | 8.64972452387377   | c |
| -3.20010844320541 | -8.93407449076632  | 6.91542287218408   | h |
| -5.78983635348667 | -5.79735315780138  | -3.37175720182789  | c |
| -5.76878967153662 | -7.02103090545655  | -5.39904490552422  | c |
| -5.78434012785952 | -8.44105837858009  | -7.69315661072411  | c |
| -7.99966354741992 | -8.55108976659169  | -9.21275964683212  | c |
| -9.69651682599068 | -7.50532025200579  | -8.61281934158495  | h |
| -8.02480121123893 | -9.98614647267082  | -11.43847758534631 | h |
| -9.75855208683241 | -10.06866612410881 | -12.59042072857369 | h |
| -5.85371614054801 | -11.31645404617445 | -12.20499579252151 | c |
| -5.88229952569820 | -12.43882566463572 | -13.95995976025113 | h |
| -3.64672179983765 | -11.21145012316953 | -10.72510826563512 | h |
| -1.94054130614212 | -12.24538275927289 | -11.32425373716749 | h |
| -3.60523791058168 | -9.79992284614019  | -8.48579335075658  | c |
| -1.88406193325133 | -9.71934534155952  | -7.31882137147441  | h |
| -3.73726656726309 | 1.30856402562320   | -3.64506769194259  | c |
| -4.75270766876393 | 0.58887732554395   | -5.70522864019266  | c |
| -5.97106406788927 | 0.61485653936092   | -8.12814463747130  | c |
| -7.28113190106662 | 2.83070009869383   | -8.91022904150627  | c |
| -7.35476675818182 | 4.47128775628266   | -7.63179249974937  | h |
| -8.44114230780061 | 2.92694139204822   | -11.28727187852117 | c |
| -9.43162905350820 | 4.66212750624562   | -11.87677499014094 | h |
| -8.33697021863769 | 0.82784886122231   | -12.91999632625572 | c |
| -9.24948557294979 | 0.91485156927354   | -14.79110056732091 | h |
| -7.05791988489802 | -1.37602125208432  | -12.16087739655772 | c |
| -6.97170671230795 | -3.02643054666457  | -13.42826476212377 | h |
| -5.87961332534152 | -1.48875067613576  | -9.79075981489278  | c |
| -4.87987984497073 | -3.21474488746967  | -9.19694632513244  | h |
| -2.07375240676692 | 7.93069349455334   | -3.59257922406050  | c |
| -3.04991748569789 | 8.77173482675604   | -5.58041009768166  | c |



|                   |                   |                    |   |
|-------------------|-------------------|--------------------|---|
| -4.20679415555819 | 9.78481247618754  | -7.79622567121127  | c |
| -2.79264098428610 | 10.18169396381547 | -10.04831559919069 | c |
| -0.77968421198367 | 9.65720011451991  | -10.08447134822016 | h |
| -3.95121338782760 | 11.21283196275562 | -12.19584501267583 | c |
| -2.83554878430131 | 11.49884159923002 | -13.93232827069749 | h |
| -6.52426646467729 | 11.88464864149063 | -12.14575669533984 | c |
| -7.42388478768491 | 12.70381779069666 | -13.83675600163588 | h |
| -7.94394485847790 | 11.51265409105994 | -9.92726943432021  | c |
| -9.95629531248404 | 12.05092014325627 | -9.87770878021747  | h |
| -6.80871352170104 | 10.46719489943939 | -7.77520088748998  | c |
| -7.90889751993402 | 10.18110408267219 | -6.03131668557326  | h |
| 7.79305408913016  | -2.10814213484950 | -3.63478713825719  | c |
| 8.56928698787964  | -1.41944879507222 | -5.76484060001196  | c |
| 9.61982063743221  | -0.62766373741521 | -8.12499905821437  | c |
| 8.73933882598887  | -1.63228483409905 | -10.45568025982888 | c |
| 7.18983497740925  | -3.02100347042909 | -10.44497303816217 | h |
| 9.82735314662553  | -0.85595459924129 | -12.74241243185951 | c |
| 9.11930256033800  | -1.64403935495328 | -14.53607575018096 | h |
| 11.81389450704292 | 0.91206986792561  | -12.75896104104162 | c |
| 12.67030092375116 | 1.50636561743981  | -14.56271480328979 | h |
| 12.70849058812693 | 1.91478458212985  | -10.46383034681688 | c |
| 14.27088067985426 | 3.29315838541280  | -10.46658088459674 | h |
| 11.62241409570669 | 1.16668167493345  | -8.16742258632441  | c |
| 12.32278787294304 | 1.94558003337374  | -6.36856250543812  | h |
| 2.69554950893692  | 2.46803440163953  | -3.90612037290408  | c |
| 2.49232252595641  | 3.38943132763249  | -6.10549165189207  | c |
| 2.67313063253573  | 4.20069256852779  | -8.68039028602117  | c |
| 4.98126073509401  | 5.21353224254047  | -9.61293329558139  | c |
| 6.61068414667913  | 5.38449275402317  | -8.33084784478412  | h |
| 5.18498242569770  | 5.96294966762556  | -12.14330175843110 | c |
| 6.98767500879057  | 6.73500422230998  | -12.84450314862454 | h |
| 3.10737145764499  | 5.72252087882408  | -13.78710259144709 | c |
| 3.28076542884011  | 6.30812413489737  | -15.77894068931011 | h |
| 0.81093424480729  | 4.73198505914637  | -12.88346804101167 | c |
| -0.82358304991916 | 4.54595137576569  | -14.16075760979273 | h |
| 0.58284327730996  | 3.98136407453345  | -10.35373620044842 | c |
| -1.21917391930703 | 3.21747287267621  | -9.64292427346168  | h |
| 0.59978904909787  | -3.66101741859384 | -3.76079548194237  | c |
| 1.54352003681878  | -4.21031991034105 | -5.88812797362525  | c |
| 2.26513902719014  | -5.06899454029921 | -8.35469017643518  | c |
| 3.68317967133695  | -7.33381282328085 | -8.63107201404260  | c |
| 4.25160339878578  | -8.38955498964871 | -6.93040216185034  | h |
| 4.35922818998097  | -8.19782797206923 | -11.04173692767889 | c |
| 5.46630055472070  | -9.95182242197230 | -11.23312529234425 | h |
| 3.63260685416474  | -6.83757638058270 | -13.20943350499216 | c |
| 4.15544775193046  | -7.53285826340948 | -15.10238344224351 | h |
| 2.24220335515025  | -4.58517685934876 | -12.95417473375385 | c |
| 1.67751902077461  | -3.50889619887552 | -14.64562352627121 | h |
| 1.57191947031631  | -3.69144122740572 | -10.55265273085856 | c |
| 0.49914579101542  | -1.91987995095933 | -10.34984305296119 | h |

**[Au<sub>9</sub>Ag<sub>6</sub>(C<sub>2</sub>Ph)<sub>12</sub>(PPh<sub>2</sub>-C<sub>2</sub>-C<sub>6</sub>H<sub>4</sub>-C<sub>2</sub>-PPh<sub>2</sub>)<sub>3</sub>]<sup>3+</sup> (7)**

|                    |                    |                   |    |
|--------------------|--------------------|-------------------|----|
| 2.43121282563929   | -4.16257640328557  | 3.49659160663586  | ag |
| 2.43121282563929   | 4.16257640328557   | -3.49659160663586 | ag |
| -4.82050332325856  | 0.02420386736737   | -3.49659160663586 | ag |
| 2.38929049761926   | -4.18678027065287  | -3.49659160663586 | ag |
| 2.38929049761926   | 4.18678027065287   | 3.49659160663586  | ag |
| -4.82050332325856  | -0.02420386736737  | 3.49659160663586  | ag |
| -2.04768020222425  | 3.54668614790536   | 0.00000000000000  | au |
| -2.04768020222425  | -3.54668614790536  | 0.00000000000000  | au |
| 4.50159799124958   | -7.79699643609427  | 0.00000000000000  | au |
| -9.00319598249907  | 0.00000000000000   | 0.00000000000000  | au |
| 4.09536040444854   | 0.00000000000000   | 0.00000000000000  | au |
| 4.50159799124958   | 7.79699643609427   | 0.00000000000000  | au |
| 7.30646515989306   | 12.65516888066669  | 0.00000000000000  | au |
| 7.30646515989306   | -12.65516888066669 | 0.00000000000000  | au |
| -14.61293031978614 | 0.00000000000000   | 0.00000000000000  | au |
| -15.27860498597075 | 4.42316469731537   | -0.07749087484593 | p  |
| 3.80872949998783   | -15.44324240089590 | -0.07749087484593 | p  |
| 11.46987548598295  | 11.02007770358066  | -0.07749087484593 | p  |
| -15.27860498597075 | -4.42316469731537  | 0.07749087484593  | p  |
| 3.80872949998783   | 15.44324240089590  | 0.07749087484593  | p  |
| 11.46987548598295  | -11.02007770358066 | 0.07749087484593  | p  |
| 3.84256251421361   | 17.69211819546073  | -2.56436808472837 | c  |

|                    |                    |                   |   |
|--------------------|--------------------|-------------------|---|
| 13.40054254691901  | 12.17381585066919  | 2.56436808472837  | c |
| 13.40054254691901  | -12.17381585066919 | -2.56436808472837 | c |
| 3.84256251421361   | -17.69211819546073 | 2.56436808472837  | c |
| -17.24310506113271 | -5.51830234479155  | -2.56436808472837 | c |
| -17.24310506113271 | 5.51830234479155   | 2.56436808472837  | c |
| -8.17514080343732  | 8.79330537803354   | 0.01866615338252  | c |
| -7.01081790601644  | 9.47135414606930   | -2.30432178992998 | c |
| -6.97927638020215  | 9.48660102350638   | 2.32096697411139  | c |
| -4.72599929182293  | 10.78753115704097  | -2.32096697411139 | c |
| -4.69702434572677  | 10.80722348095174  | 2.30432178992998  | c |
| -3.52765543889266  | 11.47653230430822  | -0.01866615338252 | c |
| -3.52765543889266  | -11.47653230430822 | 0.01866615338252  | c |
| -4.69702434572677  | -10.80722348095174 | -2.30432178992998 | c |
| -4.72599929182293  | -10.78753115704097 | 2.32096697411139  | c |
| -6.97927638020215  | -9.48660102350638  | -2.32096697411139 | c |
| -7.01081790601644  | -9.47135414606930  | 2.30432178992998  | c |
| -8.17514080343732  | -8.79330537803354  | -0.01866615338252 | c |
| 11.70279624233004  | 2.68322692627472   | 0.01866615338252  | c |
| 11.70527567202509  | 1.30093013353459   | 2.32096697411139  | c |
| 11.70784225174332  | 1.33586933488245   | -2.30432178992998 | c |
| 11.70784225174332  | -1.33586933488245  | 2.30432178992998  | c |
| 11.70527567202509  | -1.30093013353459  | -2.32096697411139 | c |
| 11.70279624233004  | -2.68322692627472  | -0.01866615338252 | c |
| -16.88661689184494 | 5.40421532495245   | -3.00521147000444 | c |
| -16.88661689184494 | -5.40421532495245  | 3.00521147000444  | c |
| 3.76312068699246   | -17.32634687478933 | -3.00521147000444 | c |
| 13.12349620485242  | -11.92213154983692 | 3.00521147000444  | c |
| 13.12349620485242  | 11.92213154983692  | -3.00521147000444 | c |
| 3.76312068699246   | 17.32634687478933  | 3.00521147000444  | c |
| 15.72584603726534  | 12.50276929479979  | -2.99773574945334 | c |
| -18.69063884558531 | 7.36759751687474   | -2.99773574945334 | c |
| 2.96479280832002   | -19.87036681167446 | -2.99773574945334 | c |
| 2.96479280832002   | 19.87036681167446  | 2.99773574945334  | c |
| 15.72584603726534  | -12.50276929479979 | 2.99773574945334  | c |
| -18.69063884558531 | -7.36759751687474  | 2.99773574945334  | c |
| 15.25128804227739  | 10.63795359286888  | 3.71845844966751  | c |
| -16.83838207684312 | 7.88902608861166   | 3.71845844966751  | c |
| 1.58709403456566   | -18.52697968148050 | 3.71845844966751  | c |
| 1.58709403456566   | 18.52697968148050  | -3.71845844966751 | c |
| 15.25128804227739  | -10.63795359286888 | -3.71845844966751 | c |
| -16.83838207684312 | -7.88902608861166  | -3.71845844966751 | c |
| 16.93231451202114  | 13.15462144564082  | -5.27091672481684 | c |
| -19.85839360510313 | 8.08650378945782   | -5.27091672481684 | c |
| 2.92607909308192   | -21.24112523509860 | -5.27091672481684 | c |
| 2.92607909308192   | 21.24112523509860  | 5.27091672481684  | c |
| 16.93231451202114  | -13.15462144564082 | 5.27091672481684  | c |
| -19.85839360510313 | -8.08650378945782  | 5.27091672481684  | c |
| 16.76612931365888  | 11.63091913290857  | 5.66079125304030  | c |
| -18.45573609529075 | 8.70443434230931   | 5.66079125304030  | c |
| 1.68960678163180   | -20.33535347521774 | 5.66079125304030  | c |
| 1.68960678163180   | 20.33535347521774  | -5.66079125304030 | c |
| 16.76612931365888  | -11.63091913290857 | -5.66079125304030 | c |
| -18.45573609529075 | -8.70443434230931  | -5.66079125304030 | c |
| 11.73793772651877  | 12.00073956428570  | -5.28418816474698 | c |
| -16.26191419013183 | 4.16498247706222   | -5.28418816474698 | c |
| 4.52397646361305   | -16.16572204134787 | -5.28418816474698 | c |
| 4.52397646361305   | 16.16572204134787  | 5.28418816474698  | c |
| 11.73793772651877  | -12.00073956428570 | 5.28418816474698  | c |
| -16.26191419013183 | -4.16498247706222  | 5.28418816474698  | c |
| 13.06870962362325  | 14.69498052094752  | 3.37635293724523  | c |
| -19.26058125106957 | 3.97034426826615   | 3.37635293724523  | c |
| 6.19187162744644   | -18.66532478921365 | 3.37635293724523  | c |
| 6.19187162744644   | 18.66532478921365  | -3.37635293724523 | c |
| 13.06870962362325  | -14.69498052094752 | -3.37635293724523 | c |
| -19.26058125106957 | -3.97034426826615  | -3.37635293724523 | c |
| 12.96357243326187  | 12.64288540877231  | -7.54875605189550 | c |
| -17.43084615776342 | 4.90534034661829   | -7.54875605189550 | c |
| 4.46727372450150   | -17.54822575539058 | -7.54875605189550 | c |
| 4.46727372450150   | 17.54822575539058  | 7.54875605189550  | c |
| 12.96357243326187  | -12.64288540877231 | 7.54875605189550  | c |
| -17.43084615776342 | -4.90534034661829  | 7.54875605189550  | c |
| 14.59704260182982  | 15.67598663537590  | 5.31021634847677  | c |
| -20.87432395653574 | 4.80341639562029   | 5.31021634847677  | c |
| 6.27728135470598   | -20.47940303099621 | 5.31021634847677  | c |
| 6.27728135470598   | 20.47940303099621  | -5.31021634847677 | c |
| 14.59704260182982  | -15.67598663537590 | -5.31021634847677 | c |
| -20.87432395653574 | -4.80341639562029  | -5.31021634847677 | c |

|                    |                    |                    |   |
|--------------------|--------------------|--------------------|---|
| 15.55706720600617  | 13.22261919866451  | -7.54328207475296  | c |
| -19.22965773361435 | 6.86150580945092   | -7.54328207475296  | c |
| 3.67259052760808   | -20.08412500811545 | -7.54328207475296  | c |
| 3.67259052760808   | 20.08412500811545  | 7.54328207475296   | c |
| 15.55706720600617  | -13.22261919866451 | 7.54328207475296   | c |
| -19.22965773361435 | -6.86150580945092  | 7.54328207475296   | c |
| 16.44609507254213  | 14.14667274957499  | 6.45289226494499   | c |
| -20.47442551642798 | 7.16939975108806   | 6.45289226494499   | c |
| 4.02833044388591   | -21.31607250066300 | 6.45289226494499   | c |
| 4.02833044388591   | 21.31607250066300  | -6.45289226494499  | c |
| 16.44609507254213  | -14.14667274957499 | -6.45289226494499  | c |
| -20.47442551642798 | -7.16939975108806  | -6.45289226494499  | c |
| 4.23643460492105   | 0.01855378709889   | 3.81451691618365   | c |
| -2.10214925149650  | -3.67813688288259  | 3.81451691618365   | c |
| -2.13428535342457  | 3.65958309578369   | 3.81451691618365   | c |
| -2.10214925149650  | 3.67813688288259   | -3.81451691618365  | c |
| -2.13428535342457  | -3.65958309578369  | -3.81451691618365  | c |
| 4.23643460492105   | -0.01855378709889  | -3.81451691618365  | c |
| 4.67955698252817   | 7.83792121667593   | 3.81031350723667   | c |
| 4.44806039523834   | -7.97157583366421  | 3.81031350723667   | c |
| -9.12761737776647  | 0.13365461698832   | 3.81031350723667   | c |
| 4.44806039523834   | 7.97157583366421   | -3.81031350723667  | c |
| -9.12761737776647  | -0.13365461698832  | -3.81031350723667  | c |
| 4.67955698252817   | -7.83792121667593  | -3.81031350723667  | c |
| 4.78086877834376   | 8.70532977730721   | -6.03448864379145  | c |
| 5.14860234629733   | 8.49301870285923   | 6.03448864379145   | c |
| 4.71014708248444   | 0.04289017148596   | -6.14027234266705  | c |
| 4.71014708248444   | -0.04289017148596  | 6.14027234266705   | c |
| -2.39221751932177  | 4.05766194324961   | -6.14027234266705  | c |
| -2.31792956316263  | 4.10055211473566   | 6.14027234266705   | c |
| -2.31792956316263  | -4.10055211473566  | -6.14027234266705  | c |
| -2.39221751932177  | -4.05766194324961  | 6.14027234266705   | c |
| 4.78086877834376   | -8.70532977730721  | 6.03448864379145   | c |
| 5.14860234629733   | -8.49301870285923  | -6.03448864379145  | c |
| -9.92947112464110  | -0.21231107444805  | -6.03448864379145  | c |
| -9.92947112464110  | 0.21231107444805   | 6.03448864379145   | c |
| -10.93400086649576 | 0.31488494028053   | 8.53789429698569   | c |
| -12.23659868630142 | 2.50669157647578   | 9.39343440005652   | c |
| -10.70498463149580 | -1.77757037257576  | 10.20980919348898  | c |
| -13.26918606043110 | 2.59266786687407   | 11.83077246285512  | c |
| -11.73298596874940 | -1.66721630685304  | 12.64881843779443  | c |
| -13.01760294064464 | 0.51249198172865   | 13.46933793183974  | c |
| -10.93400086649576 | -0.31488494028053  | -8.53789429698569  | c |
| -12.23659868630142 | -2.50669157647578  | -9.39343440005652  | c |
| -10.70498463149580 | 1.77757037257576   | -10.20980919348898 | c |
| -13.26918606043110 | -2.59266786687407  | -11.83077246285512 | c |
| -11.73298596874940 | 1.66721630685303   | -12.64881843779443 | c |
| -13.01760294064464 | -0.51249198172865  | -13.46933793183974 | c |
| -2.63407501620980  | -4.61632508026969  | -8.77241773997905  | c |
| -5.05020285048541  | -5.30621981500970  | -9.72800214289511  | c |
| -0.56747100812471  | -4.44220172758974  | -10.47884905558519 | c |
| -5.37454661947728  | -5.80830954642740  | -12.30712133370079 | c |
| -0.91307229183621  | -4.96002669627296  | -13.05332695719509 | c |
| -3.31062900061226  | -5.64354340449657  | -13.97682686097425 | c |
| 5.73969879080004   | -9.31168004524612  | -8.53789429698569  | c |
| 8.28915792783126   | -9.34385953001440  | -9.39343440005652  | c |
| 3.81307121608273   | -10.15957382428519 | -10.20980919348898 | c |
| 8.87990926650419   | -10.19511828243868 | -11.83077246285512 | c |
| 4.42264130903629   | -10.99467206460993 | -12.64881843779443 | c |
| 6.95263254573521   | -11.01732885211301 | -13.46933793183974 | c |
| 5.31489229974569   | 0.02698666062324   | -8.77241773997905  | c |
| 4.13079504889021   | 1.72965655484767   | -10.47884905558519 | c |
| 7.12042258310543   | -1.72049405528012  | -9.72800214289511  | c |
| 4.75204526833945   | 1.68926954791466   | -13.05332695719509 | c |
| 7.71741692998839   | -1.75033913307732  | -12.30712133370079 | c |
| 6.54276645596023   | -0.04531711478737  | -13.97682686097425 | c |
| -2.68081728353589  | 4.58933841964640   | -8.77241773997905  | c |
| -2.07021973262005  | 7.02671387028973   | -9.72800214289511  | c |
| -3.56332404076553  | 2.71254517274204   | -10.47884905558519 | c |
| -2.34287031051116  | 7.55864867950477   | -12.30712133370079 | c |
| -3.83897297650330  | 3.27075714835837   | -13.05332695719509 | c |
| -3.23213745534807  | 5.68886051928395   | -13.97682686097425 | c |
| 5.19430207569578   | 9.62656498552673   | -8.53789429698569  | c |
| 3.94744075847014   | 11.85055110649019  | -9.39343440005652  | c |
| 6.89191341541302   | 8.38200345170945   | -10.20980919348898 | c |
| 4.38927679392700   | 12.78778614931286  | -11.83077246285512 | c |
| 7.31034465971318   | 9.32745575775694   | -12.64881843779443 | c |

|                    |                    |                    |   |
|--------------------|--------------------|--------------------|---|
| 6.06497039490955   | 11.52982083384168  | -13.46933793183974 | c |
| -2.63407501620980  | 4.61632508026969   | 8.77241773997905   | c |
| -5.05020285048541  | 5.30621981500970   | 9.72800214289511   | c |
| -0.56747100812471  | 4.44220172758974   | 10.47884905558519  | c |
| -5.37454661947728  | 5.80830954642742   | 12.30712133370079  | c |
| -0.91307229183621  | 4.96002669627296   | 13.05332695719509  | c |
| -3.31062900061226  | 5.64354340449657   | 13.97682686097425  | c |
| -2.68081728353589  | -4.58933841964640  | 8.77241773997905   | c |
| -2.07021973262005  | -7.02671387028973  | 9.72800214289511   | c |
| -3.56332404076553  | -2.71254517274204  | 10.47884905558519  | c |
| -2.34287031051116  | -7.55864867950477  | 12.30712133370079  | c |
| -3.83897297650330  | -3.27075714835837  | 13.05332695719509  | c |
| -3.23213745534807  | -5.68886051928395  | 13.97682686097425  | c |
| 5.73969879080004   | 9.31168004524612   | 8.53789429698569   | c |
| 8.28915792783126   | 9.34385953001440   | 9.39343440005652   | c |
| 3.81307121608273   | 10.15957382428519  | 10.20980919348898  | c |
| 8.87990926650419   | 10.19511828243868  | 11.83077246285512  | c |
| 4.42264130903629   | 10.99467206460993  | 12.64881843779443  | c |
| 6.95263254573521   | 11.01732885211301  | 13.46933793183974  | c |
| 5.31489229974569   | -0.02698666062324  | 8.77241773997905   | c |
| 4.13079504889021   | -1.72965655484767  | 10.47884905558519  | c |
| 7.12042258310543   | 1.72049405528012   | 9.72800214289511   | c |
| 4.75204526833945   | -1.68926954791466  | 13.05332695719509  | c |
| 7.71741692998839   | 1.75033913307732   | 12.30712133370079  | c |
| 6.54276645596023   | 0.04531711478737   | 13.97682686097425  | c |
| 5.19430207569578   | -9.62656498552673  | 8.53789429698569   | c |
| 3.947440752837014  | -11.85055110649019 | 9.39343440005652   | c |
| 6.89191341541302   | -8.38200345170945  | 10.20980919348898  | c |
| 4.38927679392700   | -12.78778614931286 | 11.83077246285512  | c |
| 7.31034465971318   | -9.32745575775694  | 12.64881843779443  | c |
| 6.06497039490955   | -11.52982083384168 | 13.46933793183974  | c |
| -7.92179434228243  | 8.94018680483942   | -4.09692293257717  | h |
| -7.86605558079917  | 8.96735492497559   | 4.12911166172156   | h |
| -3.83292937938075  | 11.29588142304020  | -4.12911166172156  | h |
| -3.78153171642811  | 11.33056854639210  | 4.09692293257717   | h |
| -3.78153171642811  | -11.33056854639210 | -4.09692293257717  | h |
| -3.83292937938075  | -11.29588142304020 | 4.12911166172156   | h |
| -7.86605558079917  | -8.96735492497559  | -4.12911166172156  | h |
| -7.92179434228243  | -8.94018680483942  | 4.09692293257717   | h |
| 11.69898496017990  | 2.32852649806468   | 4.12911166172156   | h |
| 11.70332605871059  | 2.39038174155276   | -4.09692293257717  | h |
| 11.70332605871059  | -2.39038174155276  | 4.09692293257717   | h |
| 11.69898496017990  | -2.32852649806468  | -4.12911166172156  | h |
| 16.81430898728934  | 12.46080115008193  | -1.22286287749133  | h |
| -19.19852484112192 | 8.33121815503260   | -1.22286287749133  | h |
| 2.38421585383263   | -20.79201930511448 | -1.22286287749133  | h |
| 2.38421585383263   | 20.79201930511448  | 1.22286287749133   | h |
| 16.81430898728934  | -12.46080115008193 | 1.22286287749133   | h |
| -19.19852484112192 | -8.33121815503260  | 1.22286287749133   | h |
| 15.51125980582919  | 8.66735972138366   | 3.09492461693425   | h |
| -15.26178360537077 | 9.09946517585674   | 3.09492461693425   | h |
| -0.24947620045833  | -17.76682489724037 | 3.09492461693425   | h |
| -0.24947620045833  | 17.76682489724037  | -3.09492461693425  | h |
| 15.51125980582919  | -8.66735972138366  | -3.09492461693425  | h |
| -15.26178360537077 | -9.09946517585674  | -3.09492461693425  | h |
| 18.96318259296818  | 13.61748704840022  | -5.26179038556924  | h |
| -21.27468101610429 | 9.61385433791319   | -5.26179038556924  | h |
| 2.31149842313608   | -23.23134138631342 | -5.26179038556924  | h |
| 2.31149842313608   | 23.23134138631342  | 5.26179038556924   | h |
| 18.96318259296818  | -13.61748704840022 | 5.26179038556924   | h |
| -21.27468101610429 | -9.61385433791319  | 5.26179038556924   | h |
| 18.21538361488981  | 10.43000159206465  | 6.55372223083678   | h |
| -18.14033814768501 | 10.55998415414112  | 6.55372223083678   | h |
| -0.07504546720496  | -20.98998574620570 | 6.55372223083678   | h |
| -0.07504546720496  | 20.98998574620570  | -6.55372223083678  | h |
| 18.21538361488981  | -10.43000159206465 | -6.55372223083678  | h |
| -18.14033814768501 | -10.55998415414112 | -6.55372223083678  | h |
| 9.70023401346233   | 11.55524778801915  | -5.29612262677179  | h |
| -14.85725513817969 | 2.62302518430275   | -5.29612262677179  | h |
| 5.15702112471738   | -14.17827297232189 | -5.29612262677179  | h |
| 5.15702112471738   | 14.17827297232189  | 5.29612262677179   | h |
| 9.70023401346233   | -11.55524778801915 | 5.29612262677179   | h |
| -14.85725513817969 | -2.62302518430275  | 5.29612262677179   | h |
| 11.60578581217075  | 15.89497626007796  | 2.49909892696275   | h |
| -19.56834613986343 | 2.10341721418181   | 2.49909892696275   | h |
| 7.96256032769273   | -17.99839347425987 | 2.49909892696275   | h |
| 7.96256032769273   | 17.99839347425987  | -2.49909892696275  | h |

|                    |                    |                    |   |
|--------------------|--------------------|--------------------|---|
| 11.60578581217075  | -15.89497626007796 | -2.49909892696275  | h |
| -19.56834613986343 | -2.10341721418181  | -2.49909892696275  | h |
| 11.87538112617414  | 12.70022481658617  | -9.32343814607308  | h |
| -16.93640788802429 | 3.93426932659587   | -9.32343814607308  | h |
| 5.06102676185017   | -16.63449414318219 | -9.32343814607308  | h |
| 5.06102676185017   | 16.63449414318214  | 9.32343814607308   | h |
| 11.87538112617414  | -12.70022481658617 | 9.32343814607308   | h |
| -16.93640788802429 | -3.93426932659587  | 9.32343814607308   | h |
| 14.33545626362678  | 17.64579684220038  | 5.93369873335489   | h |
| -22.44943646717811 | 3.59197087804138   | 5.93369873335489   | h |
| 8.11398020355134   | -21.23776772024176 | 5.93369873335489   | h |
| 8.11398020355134   | 21.23776772024176  | -5.93369873335489  | h |
| 14.33545626362678  | -17.64579684220038 | -5.93369873335489  | h |
| -22.44943646717811 | -3.59197087804138  | -5.93369873335489  | h |
| 16.51286271001945  | 13.74159031688834  | -9.32013434378296  | h |
| -20.15699765783332 | 7.42976343763743   | -9.32013434378296  | h |
| 3.64413494781383   | -21.17135375452584 | -9.32013434378296  | h |
| 3.64413494781383   | 21.17135375452584  | 9.32013434378296   | h |
| 16.51286271001945  | -13.74159031688834 | 9.32013434378296   | h |
| -20.15699765783332 | -7.42976343763743  | 9.32013434378296   | h |
| 17.64346011617227  | 14.92081235474111  | 7.97156585715303   | h |
| -21.74353260239271 | 7.81927849389225   | 7.97156585715303   | h |
| 4.10007248622036   | -22.74009084863333 | 7.97156585715303   | h |
| 4.10007248622036   | 22.74009084863333  | -7.97156585715303  | h |
| 17.64346011617227  | -14.92081235474111 | -7.97156585715303  | h |
| -21.74353260239271 | -7.81927849389225  | -7.97156585715303  | h |
| -12.44636518777211 | 4.12595151510154   | 8.10219950131931   | h |
| -9.70523033907759  | -3.48489890885162  | 9.56490547443999   | h |
| -14.28915800752416 | 4.29696524181148   | 12.46008788354481  | h |
| -11.53404188835214 | -3.30224322499944  | 13.92470478366310  | h |
| -13.82981393948490 | 0.58810937917608   | 15.38623090204821  | h |
| -12.44636518777211 | -4.12595151510154  | -8.10219950131931  | h |
| -9.70523033907759  | 3.48489890885162   | -9.56490547443999  | h |
| -14.28915800752416 | -4.29696524181148  | -12.46008788354481 | h |
| -11.53404188835214 | 3.30224322499944   | -13.92470478366310 | h |
| -13.82981393948490 | -0.58810937917608  | -15.38623090204821 | h |
| -6.66534407442811  | -5.41814958629630  | -8.42026750607554  | h |
| 1.30833641029254   | -3.89723291881263  | -9.75901491851261  | h |
| -7.25926455347847  | -6.32888687325537  | -13.02419464100608 | h |
| 0.71007658514096   | -4.82276766572970  | -14.35017551703493 | h |
| -3.57443891938437  | -6.04611882261856  | -16.00381777625248 | h |
| 9.79636142074694   | -8.71589267983808  | -8.10219950131931  | h |
| 1.83460418485263   | -10.14742547764651 | -9.56490547443999  | h |
| 10.86586006234949  | -10.22629121230005 | -12.46008788354481 | h |
| 2.90719442185157   | -11.63989489612647 | -13.92470478366310 | h |
| 7.42422463231285   | -11.68291551161803 | -15.38623090204821 | h |
| 2.72093450701038   | 3.08166902741574   | -9.75901491851261  | h |
| 8.02492722045077   | -3.06328250027064  | -8.42026750607554  | h |
| 3.82160102250163   | 3.02632819422953   | -14.35017551703493 | h |
| 9.11060908665625   | -3.12226407947658  | -13.02419464100608 | h |
| 7.02331195437916   | -0.07249549715339  | -16.00381777625248 | h |
| -1.35958314602275  | 8.48143208656698   | -8.42026750607554  | h |
| -4.02927091730291  | 0.81556389139689   | -9.75901491851261  | h |
| -1.85134453317778  | 9.45115095273191   | -13.02419464100608 | h |
| -4.53167760764255  | 1.79643947150018   | -14.35017551703493 | h |
| -3.44887303499476  | 6.11861431977198   | -16.00381777625248 | h |
| 2.65000376702514   | 12.84184419493967  | -8.10219950131931  | h |
| 7.87062615422500   | 6.66252656879488   | -9.56490547443999  | h |
| 3.42329794517466   | 14.52325645411145  | -12.46008788354481 | h |
| 8.62684746650063   | 8.33765167112704   | -13.92470478366310 | h |
| 6.40558930717198   | 12.27102489079411  | -15.38623090204821 | h |
| -6.66534407442811  | 5.41814958629630   | 8.42026750607554   | h |
| 1.30833641029254   | 3.89723291881263   | 9.75901491851261   | h |
| -7.25926455347847  | 6.32888687325537   | 13.02419464100608  | h |
| 0.71007658514096   | 4.82276766572970   | 14.35017551703493  | h |
| -3.57443891938437  | 6.04611882261856   | 16.00381777625248  | h |
| -1.35958314602275  | -8.48143208656698  | 8.42026750607554   | h |
| -4.02927091730291  | -0.81556389139689  | 9.75901491851261   | h |
| -1.85134453317778  | -9.45115095273191  | 13.02419464100608  | h |
| -4.53167760764255  | -1.79643947150018  | 14.35017551703493  | h |
| -3.44887303499476  | -6.11861431977198  | 16.00381777625248  | h |
| 9.79636142074694   | 8.71589267983808   | 8.10219950131931   | h |
| 1.83460418485263   | 10.14742547764651  | 9.56490547443999   | h |
| 10.86586006234949  | 10.22629121230005  | 12.46008788354481  | h |
| 2.90719442185157   | 11.63989489612647  | 13.92470478366310  | h |
| 7.42422463231290   | 11.68291551161803  | 15.38623090204821  | h |
| 2.72093450701038   | -3.08166902741574  | 9.75901491851261   | h |

|                    |                    |                   |   |
|--------------------|--------------------|-------------------|---|
| 8.02492722045077   | 3.06328250027064   | 8.42026750607554  | h |
| 3.82160102250163   | -3.02632819422953  | 14.35017551703493 | h |
| 9.11060908665625   | 3.12226407947658   | 13.02419464100608 | h |
| 7.02331195437916   | 0.07249549715339   | 16.00381777625248 | h |
| 2.65000376702514   | -12.84184419493967 | 8.10219950131931  | h |
| 7.87062615422500   | -6.66252656879488  | 9.56490547443999  | h |
| 3.42329794517468   | -14.52325645411145 | 12.46008788354481 | h |
| 8.62684746650063   | -8.33765167112704  | 13.92470478366310 | h |
| 6.40558930717198   | -12.27102489079411 | 15.38623090204821 | h |
| -10.49800972727153 | 7.43260014985865   | 0.03368815935150  | c |
| -1.18781568231380  | 12.80784318792258  | -0.03368815935150 | c |
| 11.68582540958534  | 5.37524303806395   | 0.03368815935150  | c |
| 11.68582540958534  | -5.37524303806395  | -0.03368815935150 | c |
| -1.18781568231380  | -12.80784318792258 | 0.03368815935150  | c |
| -10.49800972727153 | -7.43260014985865  | -0.03368815935150 | c |
| 0.82938617085775   | 13.98074739116270  | -0.04811560908313 | c |
| 11.69298931921109  | 7.70864318909170   | 0.04811560908313  | c |
| 11.69298931921109  | -7.70864318909170  | -0.04811560908313 | c |
| 0.82938617085775   | -13.98074739116270 | 0.04811560908313  | c |
| -12.52237549006879 | -6.27210420207106  | -0.04811560908313 | c |
| -12.52237549006879 | 6.27210420207106   | 0.04811560908313  | c |

**[Au<sub>9</sub>Cu<sub>6</sub>(C<sub>2</sub>C<sub>6</sub>H<sub>4</sub>OMe)<sub>12</sub>(PPh<sub>2</sub>-C<sub>2</sub>-C<sub>6</sub>H<sub>4</sub>-C<sub>2</sub>-PPh<sub>2</sub>)<sub>3</sub>]<sup>3+</sup> (8)**

|                    |                    |                   |    |
|--------------------|--------------------|-------------------|----|
| -2.25496501811440  | 3.63236123467828   | 3.65024387150974  | cu |
| -2.25496501811440  | -3.63236123467828  | -3.65024387150974 | cu |
| 4.27319961401045   | -0.13667637299319  | -3.65024387150974 | cu |
| -2.01823459589600  | 3.76903760767150   | -3.65024387150974 | cu |
| -2.01823459589600  | -3.76903760767150  | 3.65024387150974  | cu |
| 4.27319961401045   | 0.13667637299319   | 3.65024387150974  | cu |
| 1.82539970107894   | -3.16168502638970  | 0.00000000000000  | au |
| 1.82539970107894   | 3.16168502638970   | 0.00000000000000  | au |
| -4.03697347205661  | 6.99224316240976   | 0.00000000000000  | au |
| 8.07394694411322   | 0.00000000000000   | 0.00000000000000  | au |
| -3.65079940215786  | 0.00000000000000   | 0.00000000000000  | au |
| -4.03697347205661  | -6.99224316240976  | 0.00000000000000  | au |
| -6.95013526478493  | -12.03798739808360 | 0.00000000000000  | au |
| -6.95013526478493  | 12.03798739808360  | 0.00000000000000  | au |
| 13.90027052956969  | 0.00000000000000   | 0.00000000000000  | au |
| 15.08637196609514  | -4.30052307630990  | 0.14648657020058  | p  |
| -3.81882374940187  | 15.21544291173466  | 0.14648657020058  | p  |
| -11.26754821669315 | -10.91491983542473 | 0.14648657020058  | p  |
| 15.08637196609514  | 4.30052307630990   | -0.14648657020058 | p  |
| -3.81882374940187  | -15.21544291173466 | -0.14648657020058 | p  |
| -11.26754821669315 | 10.91491983542473  | -0.14648657020058 | p  |
| -4.05856515705714  | -17.05156019157614 | -3.09917434313679 | c  |
| -12.73780172153585 | -12.04060062471390 | 3.09917434313679  | c  |
| -12.73780172153585 | 12.04060062471390  | -3.09917434313679 | c  |
| -4.05856515705714  | 17.05156019157614  | 3.09917434313679  | c  |
| 16.79636687859288  | 5.01095956686221   | -3.09917434313679 | c  |
| 16.79636687859288  | -5.01095956686221  | 3.09917434313679  | c  |
| 8.41501721771843   | -9.23127469791003  | 0.01604654443768  | c  |
| 7.26451924433565   | -9.92429482616057  | -2.30744056828367 | c  |
| 7.24510175822093   | -9.94014089061602  | 2.32482884174758  | c  |
| 4.98586364935942   | -11.24451262093059 | -2.32482884174758 | c  |
| 4.96243181193377   | -11.25340562495585 | 2.30744056828367  | c  |
| 3.78700978884339   | -11.90325603278260 | -0.01604654443768 | c  |
| 3.78700978884339   | 11.90325603278260  | 0.01604654443768  | c  |
| 4.96243181193377   | 11.25340562495585  | -2.30744056828367 | c  |
| 4.98586364935942   | 11.24451262093059  | 2.32482884174758  | c  |
| 7.24510175822093   | 9.94014089061602   | -2.32482884174758 | c  |
| 7.26451924433565   | 9.92429482616057   | 2.30744056828367  | c  |
| 8.41501721771843   | 9.23127469791003   | -0.01604654443768 | c  |
| -12.20202700656178 | -2.67198133487260  | 0.01604654443768  | c  |
| -12.23096540758046 | -1.30437173031466  | 2.32482884174758  | c  |
| -12.22695105626929 | -1.32911079879535  | -2.30744056828367 | c  |
| -12.22695105626929 | 1.32911079879535   | 2.30744056828367  | c  |
| -12.23096540758046 | 1.30437173031466   | -2.32482884174758 | c  |
| -12.20202700656178 | 2.67198133487260   | -0.01604654443768 | c  |
| 17.21376776504671  | -5.18289527867162  | -2.45357618427825 | c  |
| 17.21376776504671  | 5.18289527867162   | 2.45357618427825  | c  |
| -4.11836490603929  | 17.49900781871203  | -2.45357618427825 | c  |
| -13.09540285900738 | 12.31611254004035  | 2.45357618427825  | c  |
| -13.09540285900738 | -12.31611254004035 | -2.45357618427825 | c  |
| -4.11836490603929  | -17.49900781871203 | 2.45357618427825  | c  |

|                    |                    |                   |   |
|--------------------|--------------------|-------------------|---|
| -15.12218045577138 | -11.00845910669097 | -3.59184326911147 | c |
| 17.09469547080220  | -7.59196288196510  | -3.59184326911147 | c |
| -1.97251501503084  | 18.60042198865600  | -3.59184326911147 | c |
| -1.97251501503084  | -18.60042198865600 | 3.59184326911147  | c |
| -15.12218045577138 | 11.00845910669097  | 3.59184326911147  | c |
| 17.09469547080220  | 7.59196288196510   | 3.59184326911147  | c |
| -15.29761573242112 | -12.78678253788947 | 3.16265032877132  | c |
| 18.72248637669009  | -6.85473257266441  | 3.16265032877132  | c |
| -3.42487064426901  | 19.64151511055388  | 3.16265032877132  | c |
| -3.42487064426901  | -19.64151511055388 | -3.16265032877132 | c |
| -15.29761573242112 | 12.78678253788947  | -3.16265032877132 | c |
| 18.72248637669009  | 6.85473257266441   | -3.16265032877132 | c |
| -16.54681823367405 | -12.18190530967915 | -5.50112435919188 | c |
| 18.82324858151571  | -8.23901228732568  | -5.50112435919188 | c |
| -2.27643034784168  | 20.42091759700491  | -5.50112435919188 | c |
| -2.27643034784168  | -20.42091759700491 | 5.50112435919188  | c |
| -16.54681823367405 | 12.18190530967915  | 5.50112435919188  | c |
| 18.82324858151571  | 8.23901228732568   | 5.50112435919188  | c |
| -16.37607933736554 | -13.59827761926059 | 5.44808548377509  | c |
| 19.96449353467577  | -7.38296191091769  | 5.44808548377509  | c |
| -3.58841419731022  | 20.98123953017825  | 5.44808548377509  | c |
| -3.58841419731022  | -20.98123953017825 | -5.44808548377509 | c |
| -16.37607933736554 | 13.59827761926059  | -5.44808548377509 | c |
| 19.96449353467577  | 7.38296191091769   | -5.44808548377509 | c |
| -12.49612466767464 | -14.79019991468999 | -3.25467335390973 | c |
| 19.05675118700928  | -3.42686145371861  | -3.25467335390973 | c |
| -6.56062651933463  | 18.21706136840857  | -3.25467335390973 | c |
| -6.56062651933463  | -18.21706136840857 | 3.25467335390973  | c |
| -12.49612466767464 | 14.79019991468999  | 3.25467335390973  | c |
| 19.05675118700928  | 3.42686145371861   | 3.25467335390973  | c |
| -11.26783487195964 | -12.11639164231880 | 5.32381264269934  | c |
| 16.12702040042933  | -3.70003542360587  | 5.32381264269934  | c |
| -4.85918552846965  | 15.81642706592460  | 5.32381264269934  | c |
| -4.85918552846965  | -15.81642706592460 | -5.32381264269934 | c |
| -11.26783487195964 | 12.11639164231880  | -5.32381264269934 | c |
| 16.12702040042933  | 3.70003542360587   | -5.32381264269934 | c |
| -13.93409263296139 | -15.95395468019485 | -5.15592718859924 | c |
| 20.78357636035512  | -4.09030085873270  | -5.15592718859924 | c |
| -6.84948372739376  | 20.04425553892758  | -5.15592718859924 | c |
| -6.84948372739376  | -20.04425553892758 | 5.15592718859924  | c |
| -13.93409263296139 | 15.95395468019485  | 5.15592718859924  | c |
| 20.78357636035512  | 4.09030085873270   | 5.15592718859924  | c |
| -12.36460997137987 | -12.92162328298132 | 7.60335563618067  | c |
| 17.37275900688420  | -4.24725470161069  | 7.60335563618067  | c |
| -5.00814903550437  | 17.16887798459193  | 7.60335563618067  | c |
| -5.00814903550437  | -17.16887798459193 | -7.60335563618067 | c |
| -12.36460997137987 | 12.92162328298132  | -7.60335563618067 | c |
| 17.37275900688420  | 4.24725470161069   | -7.60335563618067 | c |
| -15.96101946286565 | -14.65307689716394 | -6.27933002361548 | c |
| 20.67044656798371  | -6.49610987655759  | -6.27933002361548 | c |
| -4.70942710511802  | 21.14918677372155  | -6.27933002361548 | c |
| -4.70942710511802  | -21.14918677372155 | 6.27933002361548  | c |
| -15.96101946286565 | 14.65307689716394  | 6.27933002361548  | c |
| 20.67044656798371  | 6.49610987655759   | 6.27933002361548  | c |
| -14.91478031713989 | -13.66444977875383 | 7.66684619401949  | c |
| 19.29115079570746  | -6.08435375713038  | 7.66684619401949  | c |
| -4.37637047856749  | 19.74880353588422  | 7.66684619401949  | c |
| -4.37637047856749  | -19.74880353588422 | -7.66684619401949 | c |
| -14.91478031713989 | 13.66444977875383  | -7.66684619401949 | c |
| 19.29115079570746  | 6.08435375713038   | -7.66684619401949 | c |
| -3.79101461925802  | -0.04418023959585  | 3.84746650597888  | c |
| 1.85724609979386   | 3.30520508619355   | 3.84746650597888  | c |
| 1.93376851946426   | -3.26102484659776  | 3.84746650597888  | c |
| 1.85724609979386   | -3.30520508619355  | -3.84746650597888 | c |
| 1.93376851946426   | 3.26102484659776   | -3.84746650597888 | c |
| -3.79101461925802  | 0.04418023959585   | -3.84746650597888 | c |
| -3.75106990939714  | -7.26583626054449  | 3.80500252371822  | c |
| -4.41686382667103  | 6.88143996318155   | 3.80500252371822  | c |
| 8.16793373606818   | 0.38439629736288   | 3.80500252371822  | c |
| -4.41686382667103  | -6.88143996318155  | -3.80500252371822 | c |
| 8.16793373606818   | -0.38439629736288  | -3.80500252371822 | c |
| -3.75106990939714  | 7.26583626054449   | -3.80500252371822 | c |
| -5.07772358234789  | -7.58431184439069  | -5.97176869788544 | c |
| -4.02934493629155  | -8.18959353790393  | 5.97176869788544  | c |
| -4.35511259622560  | 0.82648385464609   | -6.03775279366922 | c |
| -4.35511259622560  | -0.82648385464609  | 6.03775279366922  | c |
| 1.46180028417168   | -4.18488007199599  | -6.03775279366922 | c |

|                   |                    |                    |   |
|-------------------|--------------------|--------------------|---|
| 2.89331231205400  | -3.35839621734990  | 6.03775279366922   | c |
| 2.89331231205400  | 3.35839621734990   | -6.03775279366922  | c |
| 1.46180028417168  | 4.18488007199599   | 6.03775279366922   | c |
| -5.07772358234789 | 7.58431184439069   | 5.97176869788544   | c |
| -4.02934493629155 | 8.18959353790393   | -5.97176869788544  | c |
| 9.10706851863944  | -0.60528169351325  | -5.97176869788544  | c |
| 9.10706851863944  | 0.60528169351325   | 5.97176869788544   | c |
| 10.16559443265488 | 0.78799026177314   | 8.43824940963655   | c |
| 10.72548823264382 | -1.42761178447334  | 9.86822424957393   | c |
| 10.72049047025135 | 3.16350701189042   | 9.55862805880148   | c |
| 11.76231907016079 | -1.26398038982537  | 12.28248973302497  | c |
| 11.75661994311682 | 3.34514900860964   | 11.98800430613166  | c |
| 12.27539200948531 | 1.12380425635844   | 13.38260344397821  | c |
| 10.16559443265488 | -0.78799026177314  | -8.43824940963655  | c |
| 10.72548823264382 | 1.42761178447334   | -9.86822424957393  | c |
| 10.72049047025135 | -3.16350701189042  | -9.55862805880148  | c |
| 11.76231907016079 | 1.26398038982538   | -12.28248973302497 | c |
| 11.75661994311682 | -3.34514900860964  | -11.98800430613166 | c |
| 12.27539200948531 | -1.12380425635844  | -13.38260344397821 | c |
| 3.74565072967800  | 3.82458526750588   | -8.55144198018143  | c |
| 3.90007603078689  | 1.86572750361854   | -10.37904942460390 | c |
| 4.47350680695325  | 6.30891448530845   | -9.30427863973226  | c |
| 4.74698275243383  | 2.34052113004722   | -12.84044298196127 | c |
| 5.32122958033922  | 6.79219353507350   | -11.74808607391879 | c |
| 5.48270539053083  | 4.81107477335246   | -13.54678786556636 | c |
| -4.40037763169720 | 9.19765815413531   | -8.43824940963655  | c |
| -6.59909218841794 | 8.57473938522392   | -9.86822424957393  | c |
| -2.62056779777833 | 10.86597059421183  | -9.55862805880148  | c |
| -6.97579866255454 | 9.55447692726471   | -12.28248973302497 | c |
| -2.98132595065818 | 11.85410603768275  | -11.98800430613166 | c |
| -5.16445296985519 | 11.19270344980599  | -13.38260344397821 | c |
| -5.18501336543882 | 1.33153605185189   | -8.55144198018143  | c |
| -7.70043361805733 | 0.71971329616990   | -9.30427863973226  | c |
| -3.56580543006639 | 2.44470116754300   | -10.37904942460390 | c |
| -8.54282693896366 | 1.21222322840623   | -11.74808607391879 | c |
| -4.40044213293205 | 2.94074708991066   | -12.84044298196127 | c |
| -6.90786566849517 | 2.34262476298933   | -13.54678786556636 | c |
| 1.43936263576082  | -5.15612131935782  | -8.55144198018143  | c |
| -0.33427060072051 | -4.31042867116152  | -10.37904942460390 | c |
| 3.22692681110409  | -7.02862778147834  | -9.30427863973226  | c |
| -0.34654061950176 | -5.28126821995794  | -12.84044298196127 | c |
| 3.22159735862446  | -8.00441676347982  | -11.74808607391879 | c |
| 1.42516027796430  | -7.15369953634181  | -13.54678786556636 | c |
| -5.76521680095771 | -8.40966789236221  | -8.43824940963655  | c |
| -4.12639604422589 | -10.00235116969736 | -9.86822424957393  | c |
| -8.09992267247303 | -7.70246358232139  | -9.55862805880148  | c |
| -4.78652040760621 | -10.81845731709010 | -12.28248973302497 | c |
| -8.77529399245865 | -8.50895702907312  | -11.98800430613166 | c |
| -7.11093903963020 | -10.06889919344751 | -13.38260344397821 | c |
| 3.74565072967800  | -3.82458526750588  | 8.55144198018143   | c |
| 3.90007603078689  | -1.86572750361854  | 10.37904942460390  | c |
| 4.47350680695325  | -6.30891448530841  | 9.30427863973226   | c |
| 4.74698275243383  | -2.34052113004722  | 12.84044298196127  | c |
| 5.32122958033922  | -6.79219353507350  | 11.74808607391879  | c |
| 5.48270539053083  | -4.81107477335246  | 13.54678786556636  | c |
| 1.43936263576082  | 5.15612131935782   | 8.55144198018143   | c |
| -0.33427060072051 | 4.31042867116152   | 10.37904942460390  | c |
| 3.22692681110409  | 7.02862778147834   | 9.30427863973226   | c |
| -0.34654061950176 | 5.28126821995794   | 12.84044298196127  | c |
| 3.22159735862446  | 8.00441676347982   | 11.74808607391879  | c |
| 1.42516027796430  | 7.15369953634181   | 13.54678786556636  | c |
| -4.40037763169720 | -9.19765815413531  | 8.43824940963655   | c |
| -6.59909218841794 | -8.57473938522392  | 9.86822424957393   | c |
| -2.62056779777833 | -10.86597059421183 | 9.55862805880148   | c |
| -6.97579866255454 | -9.55447692726471  | 12.28248973302497  | c |
| -2.98132595065818 | -11.85410603768275 | 11.98800430613166  | c |
| -5.16445296985519 | -11.19270344980599 | 13.38260344397821  | c |
| -5.18501336543882 | -1.33153605185189  | 8.55144198018143   | c |
| -7.70043361805733 | -0.71971329616990  | 9.30427863973226   | c |
| -3.56580543006639 | -2.44470116754300  | 10.37904942460390  | c |
| -8.54282693896366 | -1.21222322840623  | 11.74808607391879  | c |
| -4.40044213293205 | -2.94074708991066  | 12.84044298196127  | c |
| -6.90786566849517 | -2.34262476298933  | 13.54678786556636  | c |
| -5.76521680095771 | 8.40966789236221   | 8.43824940963655   | c |
| -4.12639604422589 | 10.00235116969736  | 9.86822424957393   | c |
| -8.09992267247303 | 7.70246358232139   | 9.55862805880148   | c |
| -4.78652040760621 | 10.81845731709010  | 12.28248973302497  | c |



|                    |                    |                    |   |
|--------------------|--------------------|--------------------|---|
| -8.77529399245865  | 8.50895702907312   | 11.98800430613166  | c |
| -7.11093903963020  | 10.06889919344751  | 13.38260344397821  | c |
| 10.67621405328743  | -7.78790263835058  | 0.03141288120993   | c |
| 1.40641450036773   | -13.13982390556270 | -0.03141288120993  | c |
| -12.08262855365522 | -5.35192126721206  | 0.03141288120993   | c |
| -12.08262855365522 | 5.35192126721206   | -0.03141288120993  | c |
| 1.40641450036773   | 13.13982390556270  | 0.03141288120993   | c |
| 10.67621405328743  | 7.78790263835058   | -0.03141288120993  | c |
| -0.67731656625652  | -14.18393840717659 | -0.03322644736983  | c |
| -11.94499270320038 | -7.67854255637047  | 0.03322644736983   | c |
| -11.94499270320038 | 7.67854255637047   | -0.03322644736983  | c |
| -0.67731656625652  | 14.18393840717659  | 0.03322644736983   | c |
| 12.62230926945696  | 6.50539585080600   | -0.03322644736983  | c |
| 12.62230926945696  | -6.50539585080600  | 0.03322644736983   | c |
| -6.42263680940577  | -3.96636624136788  | 17.75038120834850  | c |
| -0.22365552103471  | 7.54534975691037   | 17.75038120834850  | c |
| 6.64629233044044   | -3.57898351554249  | 17.75038120834850  | c |
| -0.22365552103471  | -7.54534975691037  | -17.75038120834850 | c |
| 6.64629233044044   | 3.57898351554249   | -17.75038120834850 | c |
| -6.42263680940577  | 3.96636624136788   | -17.75038120834850 | c |
| -9.87528904707570  | 10.31434650434437  | 16.96758327516098  | c |
| 13.87013061973526  | 3.39507793230955   | 16.96758327516098  | c |
| -3.99484157265962  | -13.70942443665395 | 16.96758327516098  | c |
| -9.87528904707570  | -10.31434650434437 | -16.96758327516098 | c |
| 13.87013061973526  | -3.39507793230955  | -16.96758327516098 | c |
| -3.99484157265962  | 13.70942443665395  | -16.96758327516098 | c |
| 6.36338422722717   | -5.46993715953777  | 15.85749093129474  | o |
| -7.91879665087783  | -2.77588381505104  | 15.85749093129474  | o |
| -5.68197817942244  | -11.99596147478456 | 15.76173974467505  | o |
| -7.54781829027164  | 10.91871818452101  | 15.76173974467505  | o |
| 1.55541242365057   | 8.24582097458888   | 15.85749093129474  | o |
| 13.22979646969404  | 1.07724329026361   | 15.76173974467505  | o |
| 13.22979646969404  | -1.07724329026361  | -15.76173974467505 | o |
| 6.36338422722717   | 5.46993715953777   | -15.85749093129474 | o |
| -5.68197817942244  | 11.99596147478456  | -15.76173974467505 | o |
| 1.55541242365057   | -8.24582097458888  | -15.85749093129474 | o |
| -7.91879665087783  | 2.77588381505104   | -15.85749093129474 | o |
| -7.54781829027164  | -10.91871818452101 | -15.76173974467505 | o |
| 8.18059182360645   | -9.38479072299020  | -4.09536440726416  | h |
| 8.14396175486823   | -9.41416165507750  | 4.12529667458333   | h |
| 4.08092227119641   | -11.75995859470350 | -4.12529667458333  | h |
| 4.03717126350679   | -11.77699569872953 | 4.09536440726416   | h |
| 4.03717126350679   | 11.77699569872953  | -4.09536440726416  | h |
| 4.08092227119641   | 11.75995859470350  | 4.12529667458333   | h |
| 8.14396175486823   | 9.41416165507750   | -4.12529667458333  | h |
| 8.18059182360645   | 9.38479072299020   | 4.09536440726416   | h |
| -12.22488402606456 | -2.34579693962589  | 4.12529667458333   | h |
| -12.21776308711324 | -2.39220497573931  | -4.09536440726416  | h |
| -12.21776308711324 | 2.39220497573931   | 4.09536440726416   | h |
| -12.22488402606456 | 2.34579693962589   | -4.12529667458333  | h |
| -15.58757893598318 | -9.07153623010988  | -2.98255758155571  | h |
| 15.64997029461769  | -8.96347122700168  | -2.98255758155571  | h |
| -0.06239135863451  | 18.03500745711156  | -2.98255758155571  | h |
| -0.06239135863451  | -18.03500745711156 | 2.98255758155571   | h |
| -15.58757893598318 | 9.07153623010988   | 2.98255758155571   | h |
| 15.64997029461769  | 8.96347122700168   | 2.98255758155571   | h |
| -16.45214877643102 | -12.74797606836220 | 1.42962068667877   | h |
| 19.26614551025322  | -7.87399075304918  | 1.42962068667877   | h |
| -2.81399673382228  | 20.62196682141139  | 1.42962068667877   | h |
| -2.81399673382228  | -20.62196682141139 | -1.42962068667877  | h |
| -16.45214877643102 | 12.74797606836220  | -1.42962068667877  | h |
| 19.26614551025322  | 7.87399075304918   | -1.42962068667877  | h |
| -18.13328210730428 | -11.15676120951791 | -6.38004233115561  | h |
| 18.72867968505150  | -10.12550235415631 | -6.38004233115561  | h |
| -0.59539757774719  | 21.28226356367426  | -6.38004233115561  | h |
| -0.59539757774719  | -21.28226356367426 | 6.38004233115561   | h |
| -18.13328210730428 | 11.15676120951791  | 6.38004233115561   | h |
| 18.72867968505150  | 10.12550235415631  | 6.38004233115561   | h |
| -18.37364000308505 | -14.18741920469861 | 5.49170056341951   | h |
| 21.47348544695075  | -8.81832940031239  | 5.49170056341951   | h |
| -3.09984544386565  | 23.00574860501098  | 5.49170056341951   | h |
| -3.09984544386565  | -23.00574860501098 | -5.49170056341951  | h |
| -18.37364000308505 | 14.18741920469861  | -5.49170056341951  | h |
| 21.47348544695075  | 8.81832940031239   | -5.49170056341951  | h |
| -10.89322170735157 | -15.81065661658408 | -2.39673731081992  | h |
| 19.13904113415017  | -1.52847841933053  | -2.39673731081992  | h |
| -8.24581942679852  | 17.33913503591459  | -2.39673731081992  | h |

|                    |                    |                    |   |
|--------------------|--------------------|--------------------|---|
| -8.24581942679852  | -17.33913503591459 | 2.39673731081992   | h |
| -10.89322170735157 | 15.81065661658408  | 2.39673731081992   | h |
| 19.13904113415017  | 1.52847841933053   | 2.39673731081992   | h |
| -9.26149370560086  | -11.54574471543413 | 5.28224742175807   | h |
| 14.62965508197626  | -2.24781646832301  | 5.28224742175807   | h |
| -5.36816137637545  | 13.79356118375707  | 5.28224742175807   | h |
| -5.36816137637545  | -13.79356118375707 | -5.28224742175807  | h |
| -9.26149370560086  | 11.54574471543413  | -5.28224742175807  | h |
| 14.62965508197626  | 2.24781646832301   | -5.28224742175807  | h |
| -13.46017554405536 | -17.88698083387345 | -5.76944322408183  | h |
| 22.22066757116745  | -2.71336354361331  | -5.76944322408183  | h |
| -8.76049202711203  | 20.60034437748672  | -5.76944322408183  | h |
| -8.76049202711203  | -20.60034437748672 | 5.76944322408183   | h |
| -13.46017554405536 | 17.88698083387345  | 5.76944322408183   | h |
| 22.22066757116745  | 2.71336354361331   | 5.76944322408183   | h |
| -11.20664007992421 | -12.97478896166935 | 9.33390341714571   | h |
| 16.83981688950959  | -3.21784051944847  | 9.33390341714571   | h |
| -5.63317680958550  | 16.19262948111788  | 9.33390341714571   | h |
| -5.63317680958550  | -16.19262948111788 | -9.33390341714571  | h |
| -11.20664007992421 | 12.97478896166935  | -9.33390341714571  | h |
| 16.83981688950959  | 3.21784051944847   | -9.33390341714571  | h |
| -17.08780083795046 | -15.57042852135258 | -7.77214023521205  | h |
| 22.02828706627637  | -7.01325535979783  | -7.77214023521205  | h |
| -4.94048622832588  | 22.58368388115042  | -7.77214023521205  | h |
| -4.94048622832588  | -22.58368388115042 | 7.77214023521205   | h |
| -17.08780083795046 | 15.57042852135258  | 7.77214023521205   | h |
| 22.02828706627637  | 7.01325535979783   | 7.77214023521205   | h |
| -15.76912621283466 | -14.30894765156986 | 9.45439206540294   | h |
| 20.27647527409853  | -6.50199007001298  | 9.45439206540294   | h |
| -4.50734906126382  | 20.81093772158290  | 9.45439206540294   | h |
| -4.50734906126382  | -20.81093772158290 | -9.45439206540294  | h |
| -15.76912621283466 | 14.30894765156986  | -9.45439206540294  | h |
| 20.27647527409853  | 6.50199007001298   | -9.45439206540294  | h |
| 10.30750278192254  | -3.29249436723011  | 9.04488093992554   | h |
| 10.31930016039776  | 4.90044781028666   | 8.48462760877502   | h |
| 12.18688407899576  | -2.97488090524333  | 13.38985615444698  | h |
| 12.14977125378141  | 5.22377680303956   | 12.78607288226319  | h |
| 10.30750278192254  | 3.29249436723011   | -9.04488093992554  | h |
| 10.31930016039776  | -4.90044781028666  | -8.48462760877502  | h |
| 12.18688407899576  | 2.97488090524333   | -13.38985615444698 | h |
| 12.14977125378141  | -5.22377680303956  | -12.78607288226319 | h |
| 3.35590317087154   | -0.07090729618843  | -9.84436940776283  | h |
| 4.35627006831813   | 7.85463219234778   | -7.91628796630970  | h |
| 4.86368194714332   | 0.76190351447233   | -14.18595947011643 | h |
| 5.89409053960080   | 8.70456837039651   | -12.33703892954755 | h |
| -8.00513515479970  | 7.28031207510860   | -9.04488093992554  | h |
| -0.91573778657073  | 11.38699999332461  | -8.48462760877502  | h |
| -8.66976447667184  | 9.06671075276474   | -13.38985615444698 | h |
| -1.55096221175862  | 13.13389895746443  | -12.78607288226319 | h |
| -8.98044605011533  | -0.15467555126462  | -7.91628796630970  | h |
| -1.61654406562290  | 2.94175104670972   | -9.84436940776283  | h |
| -10.48542260754231 | 0.75214795430148   | -12.33703892954755 | h |
| -3.09166877233733  | 3.83112036491772   | -14.18595947011643 | h |
| -1.73935910524863  | -2.87084375052128  | -9.84436940776283  | h |
| 4.62417598179715   | -7.69995664108312  | -7.91628796630970  | h |
| -1.77201317480595  | -4.59302387939004  | -14.18595947011643 | h |
| 4.59133206794156   | -9.45671632469807  | -12.33703892954755 | h |
| -2.30236762712283  | -10.57280644233877 | -9.04488093992554  | h |
| -9.40356237382701  | -6.48655218303793  | -8.48462760877502  | h |
| -3.51711960232388  | -12.04159165800807 | -13.38985615444698 | h |
| -10.59880904202280 | -7.91012215442483  | -12.78607288226319 | h |
| 3.35590317087154   | 0.07090729618843   | 9.84436940776283   | h |
| 4.35627006831813   | -7.85463219234778  | 7.91628796630970   | h |
| 4.86368194714332   | -0.76190351447233  | 14.18595947011643  | h |
| 5.89409053960080   | -8.70456837039651  | 12.33703892954755  | h |
| -1.73935910524863  | 2.87084375052128   | 9.84436940776283   | h |
| 4.62417598179715   | 7.69995664108312   | 7.91628796630970   | h |
| -1.77201317480595  | 4.59302387939004   | 14.18595947011643  | h |
| 4.59133206794156   | 9.45671632469803   | 12.33703892954755  | h |
| -8.00513515479970  | -7.28031207510860  | 9.04488093992554   | h |
| -0.91573778657073  | -11.38699999332461 | 8.48462760877502   | h |
| -8.66976447667184  | -9.06671075276474  | 13.38985615444698  | h |
| -1.55096221175862  | -13.13389895746443 | 12.78607288226319  | h |
| -8.98044605011533  | 0.15467555126462   | 7.91628796630970   | h |
| -1.61654406562290  | -2.94175104670972  | 9.84436940776283   | h |
| -10.48542260754231 | -0.75214795430148  | 12.33703892954755  | h |
| -3.09166877233733  | -3.83112036491772  | 14.18595947011643  | h |

|                    |                    |                    |   |
|--------------------|--------------------|--------------------|---|
| -2.30236762712283  | 10.57280644233877  | 9.04488093992554   | h |
| -9.40356237382701  | 6.48655218303793   | 8.48462760877502   | h |
| -3.51711960232388  | 12.04159165800807  | 13.38985615444698  | h |
| -10.59880904202280 | 7.91012215442483   | 12.78607288226319  | h |
| 14.63631969592516  | 2.87717532466884   | 18.84630459286200  | h |
| 12.18058346628268  | 4.62812070283521   | 17.22419937844860  | h |
| 15.34228221621830  | 4.44463005119166   | 15.88637179612070  | h |
| 8.02704973807527   | -2.10114504175811  | 17.16244530659974  | h |
| 7.37614368595632   | -4.56796387958201  | 19.44589783043873  | h |
| 4.80202238333868   | -2.67376695773084  | 18.21946802855562  | h |
| 0.26790092030956   | 8.67190975379328   | 19.44589783043873  | h |
| -0.08546108247489  | 5.49555685237824   | 18.21946802855562  | h |
| -2.19387988583940  | 8.00220151149347   | 17.16244530659974  | h |
| -4.71656130086372  | -2.82178989464734  | 18.21946802855562  | h |
| -7.64404460626585  | -4.10394587421133  | 19.44589783043873  | h |
| -5.83316985223589  | -5.90105646973532  | 17.16244530659974  | h |
| -3.82197857335342  | -15.50912117687107 | 15.88637179612070  | h |
| -4.82645292565760  | -14.11401233691614 | 18.84630459286200  | h |
| -2.08222163270533  | -12.86275506613513 | 17.22419937844860  | h |
| -9.80986677026756  | 11.23683701224725  | 18.84630459286200  | h |
| -11.52030364286487 | 11.06449112567939  | 15.88637179612070  | h |
| -10.09836183357734 | 8.23463436329997   | 17.22419937844860  | h |
| -4.82645292565760  | 14.11401233691614  | -18.84630459286200 | h |
| -3.82197857335342  | 15.50912117687107  | -15.88637179612070 | h |
| -2.08222163270533  | 12.86275506613513  | -17.22419937844860 | h |
| -7.64404460626585  | 4.10394587421133   | -19.44589783043873 | h |
| -4.71656130086372  | 2.82178989464732   | -18.21946802855562 | h |
| -5.83316985223589  | 5.90105646973535   | -17.16244530659974 | h |
| 7.37614368595632   | 4.56796387958201   | -19.44589783043873 | h |
| 8.02704973807527   | 2.10114504175811   | -17.16244530659974 | h |
| 4.80202238333868   | 2.67376695773084   | -18.21946802855562 | h |
| 12.18058346628268  | -4.62812070283521  | -17.22419937844860 | h |
| 14.63631969592516  | -2.87717532466884  | -18.84630459286200 | h |
| 15.34228221621830  | -4.44463005119166  | -15.88637179612070 | h |
| 0.26790092030956   | -8.67190975379328  | -19.44589783043873 | h |
| -0.08546108247489  | -5.49555685237824  | -18.21946802855562 | h |
| -2.19387988583940  | -8.00220151149347  | -17.16244530659974 | h |
| -11.52030364286487 | -11.06449112567939 | -15.88637179612070 | h |
| -9.80986677026756  | -11.23683701224725 | -18.84630459286200 | h |
| -10.09836183357734 | -8.23463436329997  | -17.22419937844860 | h |

**[Au<sub>9</sub>Cu<sub>6</sub>(C<sub>2</sub>C<sub>6</sub>H<sub>4</sub>NMe<sub>2</sub>)<sub>12</sub>(PPh<sub>2</sub>-C<sub>2</sub>-C<sub>6</sub>H<sub>4</sub>-C<sub>2</sub>-PPh<sub>2</sub>)<sub>3</sub>]<sup>3+</sup> (9)**

|                    |                    |                   |    |
|--------------------|--------------------|-------------------|----|
| -2.32818495307151  | 3.58360066676477   | 3.67927407197823  | cu |
| -2.32818495307151  | -3.58360066676477  | -3.67927407197823 | cu |
| 4.26758169097299   | -0.22446698068621  | -3.67927407197823 | cu |
| -1.93939673790139  | 3.80806764745097   | -3.67927407197823 | cu |
| -1.93939673790139  | -3.80806764745097  | 3.67927407197823  | cu |
| 4.26758169097299   | 0.22446698068621   | 3.67927407197823  | cu |
| 1.83135439553634   | -3.17199885973354  | 0.00000000000000  | au |
| 1.83135439553634   | 3.17199885973354   | 0.00000000000000  | au |
| -4.01267940923714  | 6.95016461128417   | 0.00000000000000  | au |
| 8.02535881847423   | 0.00000000000000   | 0.00000000000000  | au |
| -3.66270879107273  | 0.00000000000000   | 0.00000000000000  | au |
| -4.01267940923714  | -6.95016461128417  | 0.00000000000000  | au |
| -6.83266651612194  | -11.83452555709776 | 0.00000000000000  | au |
| -6.83266651612194  | 11.83452555709776  | 0.00000000000000  | au |
| 13.66533303224385  | 0.00000000000000   | 0.00000000000000  | au |
| 15.00359314975671  | -4.23727276268428  | 0.45937459009313  | p  |
| -3.83221071962987  | 15.11212919707765  | 0.45937459009313  | p  |
| -11.17138243012682 | -10.87485643439337 | 0.45937459009313  | p  |
| 15.00359314975671  | 4.23727276268428   | -0.45937459009313 | p  |
| -3.83221071962987  | -15.11212919707765 | -0.45937459009313 | p  |
| -11.17138243012682 | 10.87485643439337  | -0.45937459009313 | p  |
| -4.18090390818506  | -16.67974106382798 | -3.55587515503636 | c  |
| -12.35462753572900 | -11.96063952718392 | 3.55587515503636  | c  |
| -12.35462753572900 | 11.96063952718392  | -3.55587515503636 | c  |
| -4.18090390818506  | 16.67974106382798  | 3.55587515503636  | c  |
| 16.53553144391405  | 4.71910153664405   | -3.55587515503636 | c  |
| 16.53553144391405  | -4.71910153664405  | 3.55587515503636  | c  |
| 8.44316597243997   | -9.28680507584919  | 0.11494098950600  | c  |
| 7.36672526348608   | -9.93383468987237  | -2.25690685981612 | c  |
| 7.19998390154849   | -10.03553881437123 | 2.37211397779043  | c  |
| 5.09103960313591   | -11.25313837276565 | -2.37211397779043 | c  |
| 4.91959056668152   | -11.34668856581579 | 2.25690685981612  | c  |

|                    |                    |                   |   |
|--------------------|--------------------|-------------------|---|
| 3.82102612945962   | -11.95539875842596 | -0.11494098950600 | c |
| 3.82102612945962   | 11.95539875842596  | 0.11494098950600  | c |
| 4.91959056668152   | 11.34668856581579  | -2.25690685981612 | c |
| 5.09103960313591   | 11.25313837276565  | 2.37211397779043  | c |
| 7.19998390154849   | 10.03553881437123  | -2.37211397779043 | c |
| 7.36672526348608   | 9.93383468987237   | 2.25690685981612  | c |
| 8.44316597243997   | 9.28680507584919   | -0.11494098950600 | c |
| -12.26419210189967 | -2.66859368257673  | 0.11494098950600  | c |
| -12.29102350468451 | -1.21759955839440  | 2.37211397779043  | c |
| -12.28631583016764 | -1.41285387594340  | -2.25690685981612 | c |
| -12.28631583016764 | 1.41285387594340   | 2.25690685981612  | c |
| -12.29102350468451 | 1.21759955839440   | -2.37211397779043 | c |
| -12.26419210189967 | 2.66859368257673   | -0.11494098950600 | c |
| 17.33458755947131  | -5.21507562176272  | -1.92924036571340 | c |
| 17.33458755947131  | 5.21507562176272   | 1.92924036571340  | c |
| -4.15090580863225  | 17.61973100150925  | -1.92924036571340 | c |
| -13.18368175083918 | 12.40465537974650  | 1.92924036571340  | c |
| -13.18368175083918 | -12.40465537974650 | -1.92924036571340 | c |
| -4.15090580863225  | -17.61973100150925 | 1.92924036571340  | c |
| -15.40980316126818 | -11.23442418039592 | -2.81954246030504 | c |
| 17.43419831774708  | -7.72806891477803  | -2.81954246030504 | c |
| -2.02439515647889  | 18.96249309517392  | -2.81954246030504 | c |
| -2.02439515647889  | -18.96249309517392 | 2.81954246030504  | c |
| -15.40980316126818 | 11.23442418039592  | 2.81954246030504  | c |
| 17.43419831774708  | 7.72806891477803   | 2.81954246030504  | c |
| -14.85779035326227 | -12.82993356392109 | 3.85731261887680  | c |
| 18.53994357185343  | -6.45225710806797  | 3.85731261887680  | c |
| -3.68215321859115  | 19.28219067198897  | 3.85731261887680  | c |
| -3.68215321859115  | -19.28219067198897 | -3.85731261887680 | c |
| -14.85779035326227 | 12.82993356392109  | -3.85731261887680 | c |
| 18.53994357185343  | 6.45225710806797   | -3.85731261887680 | c |
| -16.96867904204525 | -12.50123071322909 | -4.55628277120793 | c |
| 19.31072289724921  | -8.44469176246116  | -4.55628277120793 | c |
| -2.34204385520408  | 20.94592247569021  | -4.55628277120793 | c |
| -2.34204385520408  | -20.94592247569021 | 4.55628277120793  | c |
| -16.96867904204525 | 12.50123071322909  | 4.55628277120793  | c |
| 19.31072289724921  | 8.44469176246116   | 4.55628277120793  | c |
| -15.70028394388500 | -13.62072948870005 | 6.24703952844373  | c |
| 19.64603972723258  | -6.78647999768330  | 6.24703952844373  | c |
| -3.94575578334752  | 20.40720948638343  | 6.24703952844373  | c |
| -3.94575578334752  | -20.40720948638343 | -6.24703952844373 | c |
| -15.70028394388500 | 13.62072948870005  | -6.24703952844373 | c |
| 19.64603972723258  | 6.78647999768330   | -6.24703952844373 | c |
| -12.52226128152174 | -14.83313647831856 | -2.81345543582338 | c |
| 19.10700364878636  | -3.42802814346487  | -2.81345543582338 | c |
| -6.58474236726462  | 18.26116462178343  | -2.81345543582338 | c |
| -6.58474236726462  | -18.26116462178343 | 2.81345543582338  | c |
| -12.52226128152174 | 14.83313647831856  | 2.81345543582338  | c |
| 19.10700364878636  | 3.42802814346487   | 2.81345543582338  | c |
| -10.70368749428237 | -11.89345014400585 | 5.64985493096468  | c |
| 15.65187371049392  | -3.32294021221546  | 5.64985493096468  | c |
| -4.94818621621155  | 15.21639035622125  | 5.64985493096468  | c |
| -4.94818621621155  | -15.21639035622125 | -5.64985493096468 | c |
| -10.70368749428237 | 11.89345014400585  | -5.64985493096468 | c |
| 15.65187371049392  | 3.32294021221546   | -5.64985493096468 | c |
| -14.09242949418541 | -16.09202245500565 | -4.54230967823474 | c |
| 20.98231499139721  | -4.15839071550283  | -4.54230967823474 | c |
| -6.88988549721176  | 20.25041317050842  | -4.54230967823474 | c |
| -6.88988549721176  | -20.25041317050842 | 4.54230967823474  | c |
| -14.09242949418541 | 16.09202245500565  | 4.54230967823474  | c |
| 20.98231499139721  | 4.15839071550283   | 4.54230967823474  | c |
| -11.56404787099753 | -12.68072358912247 | 8.03451606279539  | c |
| 16.76385270204742  | -3.67439743230196  | 8.03451606279539  | c |
| -5.19980483104988  | 16.35512102142439  | 8.03451606279539  | c |
| -5.19980483104988  | -16.35512102142439 | -8.03451606279539 | c |
| -11.56404787099753 | 12.68072358912247  | -8.03451606279539 | c |
| 16.76385270204742  | 3.67439743230196   | -8.03451606279539 | c |
| -16.31822049912076 | -14.93047870826591 | -5.41230321219012 | c |
| 21.08928410158133  | -6.66675414266161  | -5.41230321219012 | c |
| -4.77106360246066  | 21.59723285092749  | -5.41230321219012 | c |
| -4.77106360246066  | -21.59723285092749 | 5.41230321219012  | c |
| -16.31822049912076 | 14.93047870826591  | 5.41230321219012  | c |
| 21.08928410158133  | 6.66675414266161   | 5.41230321219012  | c |
| -14.05794537487822 | -13.54570019110556 | 8.33479163344903  | c |
| 18.75989316498420  | -5.40168772410571  | 8.33479163344903  | c |
| -4.70194779010602  | 18.94738791521131  | 8.33479163344903  | c |
| -4.70194779010602  | -18.94738791521131 | -8.33479163344903 | c |

|                    |                    |                    |   |
|--------------------|--------------------|--------------------|---|
| -14.05794537487822 | 13.54570019110556  | -8.33479163344903  | c |
| 18.75989316498420  | 5.40168772410571   | -8.33479163344903  | c |
| -3.79140925655702  | -0.14875134338933  | 3.83996768796428   | c |
| 1.76688218605628   | 3.35783240401652   | 3.83996768796428   | c |
| 2.02452707050074   | -3.20908106062724  | 3.83996768796428   | c |
| 1.76688218605628   | -3.35783240401652  | -3.83996768796428  | c |
| 2.02452707050074   | 3.20908106062724   | -3.83996768796428  | c |
| -3.79140925655702  | 0.14875134338933   | -3.83996768796428  | c |
| -3.41570231406862  | -7.41022488565785  | 3.76068018862361   | c |
| -4.70959184170104  | 6.66319741857765   | 3.76068018862361   | c |
| 8.12529415576971   | 0.74702746708019   | 3.76068018862361   | c |
| -4.70959184170104  | -6.66319741857765  | -3.76068018862361  | c |
| 8.12529415576971   | -0.74702746708019  | -3.76068018862361  | c |
| -3.41570231406862  | 7.41022488565785   | -3.76068018862361  | c |
| -5.70902748332581  | -7.30633295100211  | -5.81798459112962  | c |
| -3.47295620241215  | -8.59732930696482  | 5.81798459112962   | c |
| -4.32861011724046  | 0.95207429389994   | -6.03291026286670  | c |
| -4.32861011724046  | -0.95207429389994  | 6.03291026286670   | c |
| 1.33978453381276   | -4.22472347155858  | -6.03291026286670  | c |
| 2.98882558342769   | -3.27264917765863  | 6.03291026286670   | c |
| 2.98882558342769   | 3.27264917765863   | -6.03291026286670  | c |
| 1.33978453381276   | 4.22472347155858   | 6.03291026286670   | c |
| -5.70902748332581  | 7.30633295100211   | 5.81798459112962   | c |
| -3.47295620241215  | 8.59732930696482   | -5.81798459112962  | c |
| 9.18198368573802   | -1.29099635596272  | -5.81798459112962  | c |
| 9.18198368573802   | 1.29099635596272   | 5.81798459112962   | c |
| 10.39669902167771  | 1.93794494386747   | 8.12320781040927   | c |
| 10.78354414165693  | 0.13849204260370   | 10.08561561808684  | c |
| 11.34883364053100  | 4.41941358925762   | 8.55095529000002   | c |
| 12.04065758692337  | 0.76672549116601   | 12.31730747202557  | c |
| 12.61623874236856  | 5.06486086108500   | 10.76730100142901  | c |
| 13.00825725765109  | 3.25466154769938   | 12.73379134410625  | c |
| 10.39669902167771  | -1.93794494386747  | -8.12320781040927  | c |
| 10.78354414165693  | -0.13849204260370  | -10.08561561808684 | c |
| 11.34883364053100  | -4.41941358925762  | -8.55095529000002  | c |
| 12.04065758692337  | -0.76672549116601  | -12.31730747202557 | c |
| 12.61623874236856  | -5.06486086108500  | -10.76730100142901 | c |
| 13.00825725765109  | -3.25466154769938  | -12.73379134410625 | c |
| 3.79413027364995   | 3.75608102797036   | -8.55546004999492  | c |
| 4.00430523506147   | 1.80742457679455   | -10.39497765427393 | c |
| 4.38583620093344   | 6.25835141242431   | -9.34672509048287  | c |
| 4.75223093289965   | 2.32117679270735   | -12.86903918598327 | c |
| 5.13925843712841   | 6.78916072944067   | -11.81395226449209 | c |
| 5.35162146757160   | 4.83118530711271   | -13.66325515346117 | c |
| -3.52003995831397  | 9.97277794020749   | -8.12320781040927  | c |
| -5.27183444371158  | 9.40806919080769   | -10.08561561808684 | c |
| -1.84709238213824  | 12.03808503065214  | -8.55095529000002  | c |
| -5.35632504038287  | 10.81087809412848  | -12.31730747202557 | c |
| -1.92182119885118  | 13.45841368164313  | -10.76730100142901 | c |
| -3.68550904779747  | 12.89281201793878  | -12.73379134410625 | c |
| -5.14992672572004  | 1.40777268826331   | -8.55546004999492  | c |
| -7.61280940943639  | 0.66906986063373   | -9.34672509048287  | c |
| -3.56742821645914  | 2.56411776967296   | -10.39497765427393 | c |
| -8.44921488063557  | 1.05614799844641   | -11.81395226449209 | c |
| -4.38631353560924  | 2.95496431618763   | -12.86903918598327 | c |
| -6.85973994013567  | 2.21904748879880   | -13.66325515346117 | c |
| 1.35579645207010   | -5.16385371623360  | -8.55546004999492  | c |
| -0.43687701860233  | -4.37154234646750  | -10.39497765427393 | c |
| 3.22697320850287   | -6.92742127305793  | -9.34672509048287  | c |
| -0.36591739729033  | -5.27614110889493  | -12.86903918598327 | c |
| 3.30995644350709   | -7.84530872788703  | -11.81395226449209 | c |
| 1.50811847256398   | -7.05023279591152  | -13.66325515346117 | c |
| -6.87665906336377  | -8.03483299634000  | -8.12320781040927  | c |
| -5.51170969794537  | -9.26957714820393  | -10.08561561808684 | c |
| -9.50174125839276  | -7.61867144139446  | -8.55095529000002  | c |
| -6.68433254654052  | -10.04415260296245 | -12.31730747202557 | c |
| -10.69441754351744 | -8.39355282055816  | -10.76730100142901 | c |
| -9.32274820985360  | -9.63815047023945  | -12.73379134410625 | c |
| 3.79413027364995   | -3.75608102797036  | 8.55546004999492   | c |
| 4.00430523506147   | -1.80742457679455  | 10.39497765427393  | c |
| 4.38583620093344   | -6.25835141242431  | 9.34672509048287   | c |
| 4.75223093289965   | -2.32117679270735  | 12.86903918598327  | c |
| 5.13925843712841   | -6.78916072944067  | 11.81395226449209  | c |
| 5.35162146757160   | -4.83118530711271  | 13.66325515346117  | c |
| 1.35579645207010   | 5.16385371623360   | 8.55546004999492   | c |
| -0.43687701860233  | 4.37154234646750   | 10.39497765427393  | c |
| 3.22697320850287   | 6.92742127305793   | 9.34672509048287   | c |

|                    |                    |                    |   |
|--------------------|--------------------|--------------------|---|
| -0.36591739729033  | 5.27614110889493   | 12.86903918598327  | c |
| 3.30995644350709   | 7.84530872788703   | 11.81395226449209  | c |
| 1.50811847256398   | 7.05023279591152   | 13.66325515346117  | c |
| -3.52003995831397  | -9.97277794020749  | 8.12320781040927   | c |
| -5.27183444371158  | -9.40806919080769  | 10.08561561808684  | c |
| -1.84709238213824  | -12.03808503065214 | 8.55095529000002   | c |
| -5.35632504038287  | -10.81087809412848 | 12.31730747202557  | c |
| -1.92182119885117  | -13.45841368164313 | 10.76730100142901  | c |
| -3.68550904779747  | -12.89281201793878 | 12.73379134410625  | c |
| -5.14992672572004  | -1.40777268826331  | 8.55546004999492   | c |
| -7.61280940943639  | -0.66906986063373  | 9.34672509048287   | c |
| -3.56742821645914  | -2.56411776967296  | 10.39497765427393  | c |
| -8.44921488063557  | -1.05614799844641  | 11.81395226449209  | c |
| -4.38631353560924  | -2.95496431618763  | 12.86903918598327  | c |
| -6.85973994013567  | -2.21904748879880  | 13.66325515346117  | c |
| -6.87665906336377  | 8.03483299634000   | 8.12320781040927   | c |
| -5.51170969794537  | 9.26957714820393   | 10.08561561808684  | c |
| -9.50174125839276  | 7.61867144139446   | 8.55095529000002   | c |
| -6.684332504052    | 10.04415260296245  | 12.31730747202557  | c |
| -10.69441754351744 | 8.39355282055816   | 10.76730100142901  | c |
| -9.32274820985360  | 9.63815047023945   | 12.73379134410625  | c |
| 14.26784245898032  | 3.88102372892298   | 14.93180996846666  | n |
| 14.26784245898032  | -3.88102372892298  | -14.93180996846666 | n |
| 6.10226856663268   | 5.34626099234627   | -16.11063355193269 | n |
| -3.77285608755264  | 14.29682589113257  | -14.93180996846666 | n |
| -7.68113211795007  | 2.61158910324601   | -16.11063355193269 | n |
| 1.57886355131732   | -7.95785009559225  | -16.11063355193269 | n |
| -10.49498637142767 | -10.41580216220967 | -14.93180996846666 | n |
| 6.10226856663268   | -5.34626099234627  | 16.11063355193269  | n |
| 1.57886355131732   | 7.95785009559225   | 16.11063355193269  | n |
| -3.77285608755264  | -14.29682589113257 | 14.93180996846666  | n |
| -7.68113211795007  | -2.61158910324601  | 16.11063355193269  | n |
| -10.49498637142767 | 10.41580216220967  | 14.93180996846666  | n |
| 10.69496231850094  | -7.83504362821545  | 0.22705586587220   | c |
| 1.43786566254350   | -13.17963087444686 | -0.22705586587220  | c |
| -12.13282798104455 | -5.34458724623132  | 0.22705586587220   | c |
| -12.13282798104455 | 5.34458724623132   | -0.22705586587220  | c |
| 1.43786566254350   | 13.17963087444686  | 0.22705586587220   | c |
| 10.69496231850094  | 7.83504362821545   | -0.22705586587220  | c |
| -0.65263612525138  | -14.20800950799246 | -0.31031196886323  | c |
| -11.97817910850675 | -7.66920421789132  | 0.31031196886323   | c |
| -11.97817910850675 | 7.66920421789132   | -0.31031196886323  | c |
| -0.65263612525138  | 14.20800950799246  | 0.31031196886323   | c |
| 12.63081523375805  | 6.53880529010115   | -0.31031196886323  | c |
| 12.63081523375805  | -6.53880529010115  | 0.31031196886323   | c |
| -10.20988381948602 | -1.83395015136322  | 16.86039204540958  | c |
| 3.51669448938815   | 9.75899383304415   | 16.86039204540958  | c |
| 6.69318933009782   | -7.92504368168097  | 16.86039204540958  | c |
| 3.51669448938815   | -9.75899383304415  | -16.86039204540958 | c |
| 6.69318933009782   | 7.92504368168097   | -16.86039204540958 | c |
| -10.20988381948602 | 1.83395015136322   | -16.86039204540958 | c |
| -6.00790906973059  | -3.77675584417393  | 17.95278395080095  | c |
| -0.26681197008074  | 7.09137980010052   | 17.95278395080095  | c |
| 6.27472103981119   | -3.31462395592666  | 17.95278395080095  | c |
| -0.26681197008074  | -7.09137980010052  | -17.95278395080095 | c |
| 6.27472103981119   | 3.31462395592666   | -17.95278395080095 | c |
| -6.00790906973059  | 3.77675584417393   | -17.95278395080095 | c |
| -9.05016844282321  | 11.70268217798872  | 16.88342874913270  | c |
| 14.65990427996521  | 1.98633469101880   | 16.88342874913270  | c |
| -5.60973583714203  | -13.68901686900753 | 16.88342874913270  | c |
| -9.05016844282321  | -11.70268217798872 | -16.88342874913270 | c |
| 14.65990427996521  | -1.98633469101880  | -16.88342874913270 | c |
| -5.60973583714203  | 13.68901686900753  | -16.88342874913270 | c |
| -13.19520704791654 | 10.01854054409956  | 15.27155129125765  | c |
| 15.27391414399281  | 6.41811423964137   | 15.27155129125765  | c |
| -2.07870709607636  | -16.43665478374085 | 15.27155129125765  | c |
| -13.19520704791654 | -10.01854054409956 | -15.27155129125765 | c |
| 15.27391414399281  | -6.41811423964137  | -15.27155129125765 | c |
| -2.07870709607636  | 16.43665478374085  | -15.27155129125765 | c |
| -7.48016075350779  | -10.50155072303076 | -17.62061175151338 | h |
| 8.33083164897820   | -9.34925116926633  | -4.00484327767484  | h |
| 8.03470528751372   | -9.53303556475877  | 4.20975041981300   | h |
| 4.23849833050473   | -11.72477667328740 | -4.20975041981300  | h |
| 3.93127319445694   | -11.88933742729956 | 4.00484327767484   | h |
| 3.93127319445694   | 11.88933742729956  | -4.00484327767484  | h |
| 4.23849833050473   | 11.72477667328740  | 4.20975041981300   | h |
| 8.03470528751372   | 9.53303556475877   | -4.20975041981300  | h |

|                    |                    |                    |   |
|--------------------|--------------------|--------------------|---|
| 8.33083164897820   | 9.34925116926633   | 4.00484327767484   | h |
| -12.27320361801845 | -2.19174110852864  | 4.20975041981300   | h |
| -12.26210484343506 | -2.54008625803334  | -4.00484327767484  | h |
| -12.26210484343506 | 2.54008625803334   | 4.00484327767484   | h |
| -12.27320361801845 | 2.19174110852864   | -4.20975041981300  | h |
| -15.92330195787358 | -9.32890351011455  | -2.15179451183736  | h |
| 16.04071840814984  | -9.12553225259177  | -2.15179451183736  | h |
| -0.11741645027627  | 18.45443576270624  | -2.15179451183736  | h |
| -0.11741645027627  | -18.45443576270624 | 2.15179451183736   | h |
| -15.92330195787358 | 9.32890351011455   | 2.15179451183736   | h |
| 16.04071840814984  | 9.12553225259177   | 2.15179451183736   | h |
| -16.15279441664049 | -12.90388665738691 | 2.22791492425250   | h |
| 19.25149086117230  | -7.53678697822467  | 2.22791492425250   | h |
| -3.09869644453180  | 20.44067363561160  | 2.22791492425250   | h |
| -3.09869644453180  | -20.44067363561160 | -2.22791492425250  | h |
| -16.15279441664049 | 12.90388665738691  | -2.22791492425250  | h |
| 19.25149086117230  | 7.53678697822467   | -2.22791492425250  | h |
| -18.70967712632746 | -11.58241564609716 | -5.23875751568256  | h |
| 19.38550474987419  | -10.41184786495575 | -5.23875751568256  | h |
| -0.67582762354670  | 21.99426351105284  | -5.23875751568256  | h |
| -0.67582762354670  | -21.99426351105284 | 5.23875751568256   | h |
| -18.70967712632746 | 11.58241564609716  | 5.23875751568256   | h |
| 19.38550474987419  | 10.41184786495575  | 5.23875751568256   | h |
| -17.65462620138370 | -14.30545670161345 | 6.47479174623519   | h |
| 21.21620201702742  | -8.13662643390998  | 6.47479174623519   | h |
| -3.56157581564370  | 22.44208313552335  | 6.47479174623519   | h |
| -3.56157581564370  | -22.44208313552335 | -6.47479174623519  | h |
| -17.65462620138370 | 14.30545670161345  | -6.47479174623519  | h |
| 21.21620201702742  | 8.13662643390998   | -6.47479174623519  | h |
| -10.76196558381823 | -15.73904307536559 | -2.16070829454154  | h |
| 19.01139392643326  | -1.45061405255765  | -2.16070829454154  | h |
| -8.24942834261502  | 17.18965712792326  | -2.16070829454154  | h |
| -8.24942834261502  | -17.18965712792326 | 2.16070829454154   | h |
| -10.76196558381823 | 15.73904307536559  | 2.16070829454154   | h |
| 19.01139392643326  | 1.45061405255765   | 2.16070829454154   | h |
| -8.73889818065953  | -11.22746742007695 | 5.42571284110224   | h |
| 14.09272109627856  | -1.95437411549838  | 5.42571284110224   | h |
| -5.35382291561899  | 13.18184153557537  | 5.42571284110224   | h |
| -5.35382291561899  | -13.18184153557537 | -5.42571284110224  | h |
| -8.73889818065953  | 11.22746742007695  | -5.42571284110224  | h |
| 14.09272109627856  | 1.95437411549838   | -5.42571284110224  | h |
| -13.56462108970667 | -17.98859002907577 | -5.22234178678056  | h |
| 22.36088648829650  | -2.75301144185828  | -5.22234178678056  | h |
| -8.79626539858969  | 20.74160147093403  | -5.22234178678056  | h |
| -8.79626539858969  | -20.74160147093403 | 5.22234178678056   | h |
| -13.56462108970667 | 17.98859002907577  | 5.22234178678056   | h |
| 22.36088648829650  | 2.75301144185828   | 5.22234178678056   | h |
| -10.25625453629544 | -12.62510060560584 | 9.65513908414614   | h |
| 16.06178511793660  | -2.56962667330826  | 9.65513908414614   | h |
| -5.80553058164124  | 15.19472727891411  | 9.65513908414614   | h |
| -5.80553058164124  | -15.19472727891411 | -9.65513908414614  | h |
| -10.25625453629544 | 12.62510060560584  | -9.65513908414614  | h |
| 16.06178511793660  | 2.56962667330826   | -9.65513908414614  | h |
| -17.54931879350763 | -15.92223706211204 | -6.76921477108294  | h |
| 22.56372117762099  | -7.23703736323332  | -6.76921477108294  | h |
| -5.01440238411326  | 23.15927442534534  | -6.76921477108294  | h |
| -5.01440238411326  | -23.15927442534534 | 6.76921477108294   | h |
| -17.54931879350763 | 15.92223706211204  | 6.76921477108294   | h |
| 22.56372117762099  | 7.23703736323332   | 6.76921477108294   | h |
| -14.72697079460186 | -14.17716719286575 | 10.20441594106337  | h |
| 19.64127234002210  | -5.66534723248378  | 10.20441594106337  | h |
| -4.91430154542016  | 19.84251442534967  | 10.20441594106337  | h |
| -4.91430154542016  | -19.84251442534967 | -10.20441594106337 | h |
| -14.72697079460186 | 14.17716719286575  | -10.20441594106337 | h |
| 19.64127234002210  | 5.66534723248378   | -10.20441594106337 | h |
| 10.05841390762030  | -1.79579990478257  | 9.83354519734984   | h |
| 11.09827389509130  | 5.85623163035667   | 7.06491781067879   | h |
| 12.27327551885526  | -0.70572672179330  | 13.76454006460468  | h |
| 13.32664362732149  | 7.00589361227629   | 10.97128122688726  | h |
| 10.05841390762030  | 1.79579990478257   | -9.83354519734984  | h |
| 11.09827389509130  | -5.85623163035667  | -7.06491781067879  | h |
| 12.27327551885526  | 0.70572672179330   | -13.76454006460468 | h |
| 13.32664362732149  | -7.00589361227629  | -10.97128122688726 | h |
| 3.56245647969277   | -0.15376537344027  | -9.85403066974619  | h |
| 4.22084830000634   | 7.81033333233271   | -7.97030744879924  | h |
| 4.88261181605116   | 0.73315798454459   | -14.19987213699054 | h |
| 5.55748946986420   | 8.76060158349810   | -12.31586019641375 | h |

|                    |                    |                    |   |
|--------------------|--------------------|--------------------|---|
| -6.58441529146551  | 7.81294201338659   | -9.83354519734984  | h |
| -0.47749158521083  | 12.53950294648510  | -7.06491781067879  | h |
| -6.74781502863010  | 10.27610502607766  | -13.76454006460468 | h |
| -0.59603996921827  | 15.04415873458054  | -10.97128122688726 | h |
| -8.87437122782767  | -0.24980481284056  | -7.97030744879924  | h |
| -1.64806352022473  | 3.16206049801053   | -9.85403066974619  | h |
| -10.36564825867563 | 0.43262627041787   | -12.31586019641375 | h |
| -3.07623934762868  | 3.86188687724602   | -14.19987213699054 | h |
| -1.91439295946807  | -3.00829512457029  | -9.85403066974619  | h |
| 4.65352292782133   | -7.56052851949215  | -7.97030744879924  | h |
| -1.80637246842252  | -4.59504486179071  | -14.19987213699054 | h |
| 4.80815878881133   | -9.19322785391596  | -12.31586019641375 | h |
| -3.47399861615474  | -9.60874191816915  | -9.83354519734984  | h |
| -10.62078230988054 | -6.68327131612845  | -7.06491781067879  | h |
| -5.52546049022515  | -10.98183174787093 | -13.76454006460468 | h |
| -12.73060365810318 | -8.03826512230427  | -10.97128122688726 | h |
| 3.56245647969277   | 0.15376537344027   | 9.85403066974619   | h |
| 4.22084830000634   | -7.81033333233271  | 7.97030744879924   | h |
| 4.88261181605116   | -0.73315798454459  | 14.19987213699054  | h |
| 5.55748946986420   | -8.76060158349810  | 12.31586019641375  | h |
| -1.91439295946807  | 3.00829512457029   | 9.85403066974619   | h |
| 4.65352292782133   | 7.56052851949215   | 7.97030744879924   | h |
| -1.80637246842252  | 4.59504486179071   | 14.19987213699054  | h |
| 4.80815878881133   | 9.19322785391596   | 12.31586019641375  | h |
| -6.58441529146551  | -7.81294201338659  | 9.83354519734984   | h |
| -0.47749158521083  | -12.53950294648510 | 7.06491781067879   | h |
| -6.74781502863010  | -10.27610502607766 | 13.76454006460468  | h |
| -0.59603996921827  | -15.04415873458054 | 10.97128122688726  | h |
| -8.87437122782767  | 0.24980481284056   | 7.97030744879924   | h |
| -1.64806352022473  | -3.16206049801053  | 9.85403066974619   | h |
| -10.36564825867563 | -0.43262627041788  | 12.31586019641375  | h |
| -3.07623934762868  | -3.86188687724602  | 14.19987213699054  | h |
| -3.47399861615474  | 9.60874191816915   | 9.83354519734984   | h |
| -10.62078230988054 | 6.68327131612845   | 7.06491781067879   | h |
| -5.52546049022515  | 10.98183174787093  | 13.76454006460468  | h |
| -12.73060365810318 | 8.03826512230427   | 10.97128122688726  | h |
| 16.22273704274283  | 6.54677197649339   | 17.13306469372351  | h |
| 13.75569755023978  | 7.88093189393306   | 15.22249237539990  | h |
| 16.69293257584713  | 6.91031887385145   | 13.79096571897734  | h |
| 15.80196359521747  | 0.35408589181606   | 16.18837284351593  | h |
| 15.68818450036121  | 2.84482902531989   | 18.49193498157720  | h |
| 12.83469008202935  | 1.22723387541371   | 17.62061175151338  | h |
| 7.66529503866543   | -1.83822005969015  | 17.37099719794205  | h |
| 6.89848406440230   | -4.09512837135981  | 19.79270380102678  | h |
| 4.41791522018843   | -2.35916065158310  | 18.25421857719927  | h |
| 7.26741580374422   | -7.95025651715738  | 18.87355969751214  | h |
| 8.28118326535570   | -8.73060641359001  | 15.73048896415174  | h |
| 5.03449294398173   | -9.21104709214572  | 16.64786739712358  | h |
| 3.42033531193444   | 11.53701828798759  | 15.73048896415174  | h |
| 3.25141620858890   | 10.26889496448573  | 18.87355969751214  | h |
| 5.45975430526206   | 8.96552233073462   | 16.64786739712358  | h |
| 0.09724316915476   | 8.02182663305432   | 19.79270380102678  | h |
| -0.16586455421457  | 5.00560713824071   | 18.25421857719927  | h |
| -2.24070224989494  | 7.55745026083210   | 17.37099719794205  | h |
| -4.25205066597390  | -2.64644648665753  | 18.25421857719927  | h |
| -6.99572723355706  | -3.92669826169458  | 19.79270380102678  | h |
| -5.42459278877052  | -5.71923020114205  | 17.37099719794205  | h |
| -10.51883201233312 | -2.31863844732827  | 18.87355969751214  | h |
| -11.70151857729013 | -2.80641187439760  | 15.73048896415174  | h |
| -10.49424724924389 | 0.24552476141115   | 16.64786739712358  | h |
| -5.38039804483027  | -15.00878082922998 | 18.49193498157720  | h |
| -7.59433442017434  | -13.86194484904319 | 16.18837284351593  | h |
| -5.35452932852162  | -11.72878459844452 | 17.62061175151338  | h |
| -2.36195459491715  | -17.91166311127021 | 13.79096571897734  | h |
| -2.44169767694410  | -17.32268838617687 | 17.13306469372351  | h |
| -0.05276154947891  | -15.85324947224956 | 15.22249237539990  | h |
| -8.20762917504309  | 13.50785895722719  | 16.18837284351593  | h |
| -10.30778645553088 | 12.16395180391015  | 18.49193498157720  | h |
| -7.48016075350779  | 10.50155072303076  | 17.62061175151338  | h |
| -13.78103936579884 | 10.77591640968346  | 17.13306469372351  | h |
| -14.33097798093000 | 11.00134423741879  | 13.79096571897734  | h |
| -13.70293600076095 | 7.97231757831646   | 15.22249237539990  | h |
| -2.44169767694409  | 17.32268838617687  | -17.13306469372351 | h |
| -2.36195459491715  | 17.91166311127021  | -13.79096571897734 | h |
| -0.05276154947891  | 15.85324947224956  | -15.22249237539990 | h |
| -7.59433442017434  | 13.86194484904319  | -16.18837284351593 | h |
| -5.38039804483027  | 15.00878082922998  | -18.49193498157720 | h |



|                    |                    |                    |   |
|--------------------|--------------------|--------------------|---|
| -5.35452932852162  | 11.72878459844452  | -17.62061175151338 | h |
| -6.99572723355706  | 3.92669826169458   | -19.79270380102678 | h |
| -4.25205066597390  | 2.64644648665753   | -18.25421857719927 | h |
| -5.42459278877052  | 5.71923020114205   | -17.37099719794205 | h |
| -11.70151857729013 | 2.80641187439760   | -15.73048896415174 | h |
| -10.51883201233312 | 2.31863844732827   | -18.87355969751214 | h |
| -10.49424724924389 | -0.24552476141115  | -16.64786739712358 | h |
| 7.26741580374422   | 7.95025651715738   | -18.87355969751214 | h |
| 8.28118326535570   | 8.73060641359001   | -15.73048896415174 | h |
| 5.03449294398173   | 9.21104709214572   | -16.64786739712358 | h |
| 6.89848406440230   | 4.09512837135981   | -19.79270380102678 | h |
| 7.66529503866543   | 1.83822005969015   | -17.37099719794205 | h |
| 4.41791522018843   | 2.35916065158310   | -18.25421857719927 | h |
| 15.68818450036121  | -2.84482902531989  | -18.49193498157720 | h |
| 15.801963565921747 | -0.35408589181606  | -16.18837284351593 | h |
| 12.83469008202935  | -1.22723387541371  | -17.62061175151338 | h |
| 13.75569755023978  | -7.88093189393306  | -15.22249237539990 | h |
| 16.22273704274283  | -6.54677197649339  | -17.13306469372351 | h |
| 16.69293257584713  | -6.91031887385145  | -13.79096571897734 | h |
| 3.25141620858890   | -10.26889496448573 | -18.87355969751214 | h |
| 3.42033531193444   | -11.53701828798759 | -15.73048896415174 | h |
| 5.45975430526206   | -8.96552233073462  | -16.64786739712358 | h |
| 0.09724316915476   | -8.02182663305432  | -19.79270380102678 | h |
| -0.16586455421457  | -5.00560713824071  | -18.25421857719927 | h |
| -2.24070224989494  | -7.55745026083210  | -17.37099719794205 | h |
| -14.33097798093000 | -11.00134423741879 | -13.79096571897734 | h |
| -13.78103936579884 | -10.77591640968346 | -17.13306469372351 | h |
| -13.70293600076095 | -7.97231757831646  | -15.22249237539990 | h |
| -10.30778645553088 | -12.16395180391015 | -18.49193498157720 | h |
| -8.20762917504309  | -13.50785895722719 | -16.18837284351593 | h |

**[Au<sub>13</sub>Ag<sub>12</sub>(C<sub>2</sub>Ph)<sub>20</sub>(PPh<sub>2</sub>-C<sub>2</sub>-(C<sub>6</sub>H<sub>4</sub>)<sub>2</sub>-C<sub>2</sub>-PPh<sub>2</sub>)<sub>3</sub>]<sup>5+</sup> (10)**

|                    |                    |                   |    |
|--------------------|--------------------|-------------------|----|
| 2.41584062814484   | 4.24046512883474   | -3.31415293692061 | ag |
| 9.58670936247852   | -0.03467930912765  | 3.29791811074038  | ag |
| 2.41584062814484   | -4.24046512883474  | 3.31415293692061  | ag |
| 2.46443021133666   | 4.21241195541944   | 3.31415293692061  | ag |
| 9.58670936247852   | 0.03467930912765   | -3.29791811074038 | ag |
| 2.46443021133666   | -4.21241195541944  | -3.31415293692061 | ag |
| -4.88027083948151  | -0.02805317341530  | -3.31415293692061 | ag |
| -4.88027083948151  | 0.02805317341530   | 3.31415293692061  | ag |
| -4.82338781521029  | -8.28499419255384  | 3.29791811074038  | ag |
| -4.82338781521029  | 8.28499419255384   | -3.29791811074038 | ag |
| -4.76332154726823  | -8.31967350168149  | -3.29791811074038 | ag |
| -4.76332154726823  | 8.31967350168149   | 3.29791811074038  | ag |
| 6.64962803174380   | -3.41647669372842  | 0.00336786991403  | au |
| -6.28356974946036  | -4.05050853514878  | 0.00336786991403  | au |
| -0.36605847125605  | 7.46698522887720   | 0.00336786991403  | au |
| -6.28356974946036  | 4.05050853514878   | -0.00336786991403 | au |
| -0.36605847125605  | -7.46698522887720  | -0.00336786991403 | au |
| 6.64962803174380   | 3.41647669372842   | -0.00336786991403 | au |
| -6.90661793567855  | 11.96261308544879  | 0.00000000000000  | au |
| 13.81323587135709  | 0.00000000000000   | 0.00000000000000  | au |
| -6.90661793567855  | -11.96261308544879 | 0.00000000000000  | au |
| 19.29363856618850  | 0.00000000000000   | 0.00000000000000  | au |
| -9.64681928309425  | 16.70878121066360  | 0.00000000000000  | au |
| -9.64681928309425  | -16.70878121066360 | 0.00000000000000  | au |
| -6.18183105186329  | -19.54565036457139 | -0.03893667313243 | p  |
| -13.83611421873010 | 15.12644794610164  | -0.03893667313243 | p  |
| 20.01794527059339  | 4.41920241846975   | -0.03893667313243 | p  |
| -13.83611421873010 | -15.12644794610164 | 0.03893667313243  | p  |
| 20.01794527059339  | -4.41920241846975  | 0.03893667313243  | p  |
| -6.18183105186329  | 19.54565036457139  | 0.03893667313243  | p  |
| 21.97340741673759  | -5.42214583966159  | 2.72942877462258  | c  |
| 21.97340741673759  | 5.42214583966159   | -2.72942877462258 | c  |
| -6.29098768042239  | 21.74060203887890  | 2.72942877462258  | c  |
| -15.68241973631520 | 16.31845601024471  | -2.72942877462258 | c  |
| -15.68241973631520 | -16.31845601024471 | 2.72942877462258  | c  |
| -6.29098768042239  | -21.74060203887890 | -2.72942877462258 | c  |
| 13.11386977245403  | -9.11502597183312  | 0.09338573014449  | c  |
| 12.42226704645009  | -10.54949289081211 | -2.06914901516167 | c  |
| 11.50016270771606  | -9.17626519278586  | 2.23600597454446  | c  |
| 10.17300388719298  | -11.93818629648250 | -2.09623389290648 | c  |
| 9.27399030104930   | -10.60005137966178 | 2.19689280099122  | c  |
| 8.54147009098044   | -11.98645292547821 | 0.02777821826297  | c  |

|                    |                    |                   |   |
|--------------------|--------------------|-------------------|---|
| -14.45077901290496 | -6.79943134661298  | 0.09338573014449  | c |
| -15.34726244472932 | -5.48325240183980  | -2.06914901516167 | c |
| -13.69696007753757 | -5.37130030141233  | 2.23600597454446  | c |
| -15.42527468586494 | -2.84098667817874  | -2.09623389290648 | c |
| -13.81690893204158 | -2.73148536357300  | 2.19689280099122  | c |
| -14.65130786841396 | -1.40390362234138  | 0.02777821826297  | c |
| 13.11386977245403  | 9.11502597183312   | -0.09338573014449 | c |
| 11.50016270771606  | 9.17626519278586   | -2.23600597454446 | c |
| 12.42226704645009  | 10.54949289081211  | 2.06914901516167  | c |
| 9.27399030104930   | 10.60005137966178  | -2.19689280099122 | c |
| 10.17300388719298  | 11.93818629648250  | 2.09623389290648  | c |
| 8.54147009098044   | 11.98645292547821  | -0.02777821826297 | c |
| -14.45077901290496 | 6.79943134661298   | -0.09338573014449 | c |
| -15.34726244472932 | 5.48325240183980   | 2.06914901516167  | c |
| -13.69696007753757 | 5.37130030141233   | -2.23600597454446 | c |
| -15.42527468586494 | 2.84098667817874   | 2.09623389290648  | c |
| -13.81690893204158 | 2.73148536357300   | -2.19689280099122 | c |
| -14.65130786841396 | 1.40390362234138   | 0.02777821826297  | c |
| 6.10983758846091   | 13.39035654781959  | 0.02777821826297  | c |
| 4.54291863099228   | 13.33153693220739  | 2.19689280099122  | c |
| 5.25227060969935   | 14.77917297466124  | -2.09623389290648 | c |
| 2.19679755879412   | 14.54756568317080  | 2.23600597454446  | c |
| 2.92499539827923   | 16.03274529265191  | -2.06914901516167 | c |
| 1.33690924045093   | 15.91445731844609  | 0.09338573014449  | c |
| 1.33690924045093   | -15.91445731844609 | -0.09338573014449 | c |
| 2.92499539827923   | -16.03274529265191 | 2.06914901516167  | c |
| 2.19679755879412   | -14.54756568317080 | -2.23600597454446 | c |
| 5.25227060969935   | -14.77917297466124 | 2.09623389290648  | c |
| 4.54291863099228   | -13.33153693220739 | -2.19689280099122 | c |
| 6.10983758846091   | -13.39035654781959 | 0.02777821826297  | c |
| 6.80149492755009   | 3.63129962667918   | 3.82702007404306  | c |
| -0.25594979867120  | -7.70591709885870  | 3.82702007404306  | c |
| -6.54554512887889  | 4.07461766115213   | 3.82702007404306  | c |
| -6.54554512887889  | -4.07461766115213  | -3.82702007404306 | c |
| 6.80149492755009   | -3.63129962667918  | -3.82702007404306 | c |
| -0.25594979867120  | 7.70591709885870   | -3.82702007404306 | c |
| 6.75475689802327   | 3.67669028147326   | -3.83090478405443 | c |
| -0.19327117332304  | -7.68813609875654  | -3.83090478405443 | c |
| -6.56148572470023  | 4.01144581728329   | -3.83090478405443 | c |
| -6.56148572470023  | -4.01144581728329  | 3.83090478405443  | c |
| 6.75475689802327   | -3.67669028147326  | 3.83090478405443  | c |
| -0.19327117332304  | 7.68813609875654   | 3.83090478405443  | c |
| 13.94718419499874  | 0.00057013037429   | 3.80885035727536  | c |
| -6.97309850103346  | -12.07890097351557 | 3.80885035727536  | c |
| -6.97408588293789  | 12.07833084314127  | 3.80885035727536  | c |
| -6.97408588293789  | -12.07833084314127 | -3.80885035727536 | c |
| 13.94718419499874  | -0.00057013037429  | -3.80885035727536 | c |
| -6.97309850103346  | 12.07890097351557  | -3.80885035727536 | c |
| 14.72849581101042  | 0.02393583811697   | 6.03991205236574  | c |
| -7.34351883814944  | -12.76721935550055 | 6.03991205236574  | c |
| -7.38497697286098  | 12.74328351738358  | 6.03991205236574  | c |
| -7.38497697286098  | -12.74328351738358 | -6.03991205236574 | c |
| 14.72849581101042  | -0.02393583811697  | -6.03991205236574 | c |
| -7.34351883814944  | 12.76721935550055  | -6.03991205236574 | c |
| 7.56051741279699   | 4.16614106619266   | 6.01770777030433  | c |
| -0.17227461523316  | -8.63067064465842  | 6.01770777030433  | c |
| -7.38824279756383  | 4.46452957846576   | 6.01770777030433  | c |
| -7.38824279756383  | -4.46452957846576  | -6.01770777030433 | c |
| 7.56051741279699   | -4.16614106619266  | -6.01770777030433 | c |
| -0.17227461523316  | 8.63067064465842   | -6.01770777030433 | c |
| 7.41748196310013   | 4.25127530717791   | -6.04043739623068 | c |
| -0.02702856390605  | -8.54936536676363  | -6.04043739623068 | c |
| -7.39045339919408  | 4.29809005958572   | -6.04043739623068 | c |
| -7.39045339919408  | -4.29809005958572  | 6.04043739623068  | c |
| 7.41748196310013   | -4.25127530717791  | 6.04043739623068  | c |
| -0.02702856390605  | 8.54936536676363   | 6.04043739623068  | c |
| 8.41867946631779   | 4.96809113719204   | 8.44294449472711  | c |
| 0.09315329383014   | -9.77483575640478  | 8.44294449472711  | c |
| -8.51183276014794  | 4.80674480818535   | 8.44294449472711  | c |
| -8.51183276014794  | -4.80674480818535  | -8.44294449472711 | c |
| 8.41867946631779   | -4.96809113719204  | -8.44294449472711 | c |
| 0.09315329383014   | 9.77483575640478   | -8.44294449472711 | c |
| 8.10120226345858   | 5.03612392359250   | -8.53122550766884 | c |
| 0.31081006008978   | -9.53390890254479  | -8.53122550766884 | c |
| -8.41201232354836  | 4.49778497895228   | -8.53122550766884 | c |
| -8.41201232354836  | -4.49778497895228  | 8.53122550766884  | c |
| 8.10120226345858   | -5.03612392359250  | 8.53122550766884  | c |

|                    |                    |                    |   |
|--------------------|--------------------|--------------------|---|
| 0.31081006008978   | 9.53390890254479   | 8.53122550766884   | c |
| -7.87136356665591  | 13.61720361918129  | 8.54694840703967   | c |
| 15.72852603039580  | 0.00819895477275   | 8.54694840703967   | c |
| -7.85716246373989  | -13.62540257395404 | 8.54694840703967   | c |
| -7.85716246373989  | 13.62540257395404  | -8.54694840703967  | c |
| -7.87136356665591  | -13.61720361918129 | -8.54694840703967  | c |
| 15.72852603039580  | -0.00819895477275  | -8.54694840703967  | c |
| -9.78427966275387  | -2.44781214869668  | 9.60031935906017   | c |
| 2.77227226756213   | 9.69734073331172   | 9.60031935906017   | c |
| 7.01200739519174   | -7.24952858461504  | 9.60031935906017   | c |
| 2.77227226756213   | -9.69734073331172  | -9.60031935906017  | c |
| 7.01200739519174   | 7.24952858461504   | -9.60031935906017  | c |
| -9.78427966275387  | 2.44781214869668   | -9.60031935906017  | c |
| -11.19270483281340 | -4.74918771860254  | -8.68749263077555  | c |
| 1.48343520328784   | 12.06776066001698  | -8.68749263077555  | c |
| 9.70926962952556   | -7.31857294141444  | -8.68749263077555  | c |
| 1.48343520328784   | -12.06776066001698 | 8.68749263077555   | c |
| 9.70926962952556   | 7.31857294141444   | 8.68749263077555   | c |
| -11.19270483281340 | 4.74918771860254   | 8.68749263077555   | c |
| -8.11060535172320  | -6.73903324276198  | 9.98030794650479   | c |
| -1.78087129358997  | 10.39350695895397  | 9.98030794650479   | c |
| 9.89147664531317   | -3.65447371619199  | 9.98030794650479   | c |
| -1.78087129358997  | -10.39350695895397 | -9.98030794650479  | c |
| 9.89147664531317   | 3.65447371619199   | -9.98030794650479  | c |
| -8.11060535172320  | 6.73903324276198   | -9.98030794650479  | c |
| -7.03208781405239  | -5.19651631884731  | -10.65342839503866 | c |
| -0.98427122624541  | 8.68822489965204   | -10.65342839503866 | c |
| 8.01635904029780   | -3.49170858080474  | -10.65342839503866 | c |
| -0.98427122624541  | -8.68822489965204  | 10.65342839503866  | c |
| 8.01635904029780   | 3.49170858080474   | 10.65342839503866  | c |
| -7.03208781405239  | 5.19651631884731   | 10.65342839503866  | c |
| -10.81331585547075 | -2.64631540676384  | 12.03131218928372  | c |
| 3.11488150518043   | 10.68776396298274  | 12.03131218928372  | c |
| 7.69843435029032   | -8.04144836724628  | 12.03131218928372  | c |
| 3.11488150518043   | -10.68776396298274 | -12.03131218928372 | c |
| 7.69843435029032   | 8.04144836724628   | -12.03131218928372 | c |
| -10.81331585547075 | 2.64631540676384   | -12.03131218928372 | c |
| -12.33360468677474 | -5.05279678829034  | -11.05795942268890 | c |
| 1.79095203764584   | 13.20761341672809  | -11.05795942268890 | c |
| 10.54265264912890  | -8.15481662843774  | -11.05795942268890 | c |
| 1.79095203764584   | -13.20761341672809 | 11.05795942268890  | c |
| 10.54265264912890  | 8.15481662843774   | 11.05795942268890  | c |
| -12.33360468677474 | 5.05279678829034   | 11.05795942268890  | c |
| -9.15725662658778  | -6.92057790954001  | 12.40676940243429  | c |
| -1.41476803582456  | 11.39070580167444  | 12.40676940243429  | c |
| 10.57202447343973  | -4.47012789213443  | 12.40676940243429  | c |
| -1.41476803582456  | -11.39070580167444 | -12.40676940243429 | c |
| 10.57202447343973  | 4.47012789213443   | -12.40676940243429 | c |
| -9.15725662658778  | 6.92057790954001   | -12.40676940243429 | c |
| -8.19243049327715  | -5.48725219617267  | -13.01487590206497 | c |
| -0.65588463442104  | 9.83847908694378   | -13.01487590206497 | c |
| 8.84831512769819   | -4.35122689077111  | -13.01487590206497 | c |
| -0.65588463442104  | -9.83847908694378  | 13.01487590206497  | c |
| 8.84831512769819   | 4.35122689077111   | 13.01487590206497  | c |
| -8.19243049327715  | 5.48725219617267   | 13.01487590206497  | c |
| -10.50832766365117 | -4.87926909565847  | 13.44249824922340  | c |
| 1.02859286296611   | 11.54011340789140  | 13.44249824922340  | c |
| 9.47973498965768   | -6.66084412326032  | 13.44249824922340  | c |
| 1.02859286296611   | -11.54011340789140 | -13.44249824922340 | c |
| 9.47973498965768   | 6.66084412326032   | -13.44249824922340 | c |
| -10.50832766365117 | 4.87926909565847   | -13.44249824922340 | c |
| -10.84231143530852 | -5.41341927335253  | -13.23274979785728 | c |
| 0.73299717694480   | 12.09642667161717  | -13.23274979785728 | c |
| 10.10931425836372  | -6.68300758723725  | -13.23274979785728 | c |
| 0.73299717694480   | -12.09642667161717 | 13.23274979785728  | c |
| 10.10931425836372  | 6.68300758723725   | 13.23274979785728  | c |
| -10.84231143530852 | 5.41341927335253   | 13.23274979785728  | c |
| -10.39171625447045 | -13.77386588402239 | 9.43576673172382   | c |
| -6.73265957446098  | 15.88642323126474  | 9.43576673172382   | c |
| 17.12437582893143  | -2.11255734724235  | 9.43576673172382   | c |
| -6.73265957446098  | -15.88642323126474 | -9.43576673172382  | c |
| 17.12437582893143  | 2.11255734724235   | -9.43576673172382  | c |
| -10.39171625447045 | 13.77386588402239  | -9.43576673172382  | c |
| -9.52372460149683  | -12.28046709969891 | -10.19339441011204 | c |
| -5.87333420553278  | 14.38802101905921  | -10.19339441011204 | c |
| 15.39705880702960  | -2.10755391936030  | -10.19339441011204 | c |
| -5.87333420553278  | -14.38802101905921 | 10.19339441011204  | c |

|                    |                    |                    |   |
|--------------------|--------------------|--------------------|---|
| 15.39705880702960  | 2.10755391936030   | 10.19339441011204  | c |
| -9.52372460149683  | 12.28046709969891  | 10.19339441011204  | c |
| -10.91400840068066 | -14.66696424942491 | 11.87330727402521  | c |
| -7.24495941579834  | 16.78529055260573  | 11.87330727402521  | c |
| 18.15896781647899  | -2.11832649215343  | 11.87330727402521  | c |
| -7.24495941579834  | -16.78529055260573 | -11.87330727402521 | c |
| 18.15896781647899  | 2.11832649215343   | -11.87330727402521 | c |
| -10.91400840068066 | 14.66696424942491  | -11.87330727402521 | c |
| -10.01382790864992 | -13.19090842668599 | -12.63293806211428 | c |
| -6.41674800970286  | 15.26768362062953  | -12.63293806211428 | c |
| 16.43057572938017  | -2.07677500497093  | -12.63293806211428 | c |
| -6.41674800970286  | -15.26768362062953 | 12.63293806211428  | c |
| 16.43057572938017  | 2.07677500497093   | 12.63293806211428  | c |
| -10.01382790864992 | 13.19090842668599  | 12.63293806211428  | c |
| -8.93291041879034  | -15.41592262020591 | 13.48292345963070  | c |
| -8.88412543791638  | 15.44408879924396  | 13.48292345963070  | c |
| 17.81703585670672  | -0.02816599006543  | 13.48292345963070  | c |
| -8.88412543791638  | -15.44408879924396 | -13.48292345963070 | c |
| 17.81703585670672  | 0.02816599006543   | -13.48292345963070 | c |
| -8.93291041879034  | 15.41592262020591  | -13.48292345963070 | c |
| -6.15176210758204  | -21.50789795034094 | 2.84196801295954   | c |
| -15.55050494696514 | -16.08153121838894 | -2.84196801295954  | c |
| -15.55050494696514 | 16.08153121838894  | 2.84196801295954   | c |
| -6.15176210758204  | 21.50789795034094  | -2.84196801295954  | c |
| 21.70226705454719  | 5.42636673195200   | 2.84196801295954   | c |
| 21.70226705454719  | -5.42636673195200  | -2.84196801295954  | c |
| 23.67388711501802  | 7.21757520543408   | 2.74946591875479   | c |
| -5.58634017492314  | -24.11097528934868 | 2.74946591875479   | c |
| -18.08754694009487 | 16.89340008391460  | 2.74946591875479   | c |
| 23.67388711501802  | -7.21757520543408  | -2.74946591875479  | c |
| -5.58634017492314  | 24.11097528934868  | -2.74946591875479  | c |
| -18.08754694009487 | -16.89340008391460 | -2.74946591875479  | c |
| 21.61821241410166  | 7.78699012941176   | -3.91061551103829  | c |
| -4.06537501063619  | -22.61541635908269 | -3.91061551103829  | c |
| -17.55283759243808 | 14.82842604069832  | -3.91061551103829  | c |
| 21.61821241410166  | -7.78699012941176  | 3.91061551103829   | c |
| -4.06537501063619  | 22.61541635908269  | 3.91061551103829   | c |
| -17.55283759243808 | -14.82842604069832 | 3.91061551103829   | c |
| 24.89727634926901  | 7.94389333433481   | 4.99193834715337   | c |
| -5.56902461436751  | -25.53362045958556 | 4.99193834715337   | c |
| -19.32825154592889 | 17.58972712525076  | 4.99193834715337   | c |
| 24.89727634926901  | -7.94389333433481  | -4.99193834715337  | c |
| -5.56902461436751  | 25.53362045958556  | -4.99193834715337  | c |
| -19.32825154592889 | -17.58972712525076 | -4.99193834715337  | c |
| 23.21964721938744  | 8.52522524925170   | -5.89649714566140  | c |
| -4.22676196875473  | -24.37141696703775 | -5.89649714566140  | c |
| -18.99288525063271 | 15.84619171778605  | -5.89649714566140  | c |
| 23.21964721938744  | -8.52522524925170  | 5.89649714566140   | c |
| -4.22676196875473  | 24.37141696703775  | 5.89649714566140   | c |
| -18.99288525063271 | -15.84619171778605 | 5.89649714566140   | c |
| 20.96540255307143  | 4.36561734424565   | 5.17724904914163   | c |
| -6.70196569774759  | -20.33937993792009 | 5.17724904914163   | c |
| -14.26343685532385 | 15.97376259367444  | 5.17724904914163   | c |
| 20.96540255307143  | -4.36561734424565  | -5.17724904914163  | c |
| -6.70196569774759  | 20.33937993792009  | -5.17724904914163  | c |
| -14.26343685532385 | -15.97376259367444 | -5.17724904914163  | c |
| 23.92382304924392  | 3.80112005458357   | -3.56099482254915  | c |
| -8.67004497836323  | -22.61919845696505 | -3.56099482254915  | c |
| -15.25377807088069 | 18.81807840238148  | -3.56099482254915  | c |
| 23.92382304924392  | -3.80112005458357  | 3.56099482254915   | c |
| -8.67004497836323  | 22.61919845696505  | 3.56099482254915   | c |
| -15.25377807088069 | -18.81807840238148 | 3.56099482254915   | c |
| 22.18895883911258  | 5.11390032690675   | 7.40970252752888   | c |
| -6.66571167983340  | -21.77315219357263 | 7.40970252752888   | c |
| -15.52324715927918 | 16.65925186666589  | 7.40970252752888   | c |
| 22.18895883911258  | -5.11390032690675  | -7.40970252752888  | c |
| -6.66571167983340  | 21.77315219357263  | -7.40970252752888  | c |
| -15.52324715927918 | -16.65925186666589 | -7.40970252752888  | c |
| 25.52410474364342  | 4.55700729520340   | -5.53755122562430  | c |
| -8.81556844148665  | -24.38302687748036 | -5.53755122562430  | c |
| -16.70853649112939 | 19.82601958227696  | -5.53755122562430  | c |
| 25.52410474364342  | -4.55700729520340  | 5.53755122562430   | c |
| -8.81556844148665  | 24.38302687748036  | 5.53755122562430   | c |
| -16.70853649112939 | -19.82601958227696 | 5.53755122562430   | c |
| 24.15653696435778  | 6.89862099262940   | 7.31894200492820   | c |
| -6.10388740778629  | -24.36948510001210 | 7.31894200492820   | c |
| -18.05264936759887 | 17.47086410738270  | 7.31894200492820   | c |

|                    |                    |                   |    |
|--------------------|--------------------|-------------------|----|
| 24.15653696435778  | -6.89862099262940  | -7.31894200492820 | c  |
| -6.10388740778629  | 24.36948510001210  | -7.31894200492820 | c  |
| -18.05264936759887 | -17.47086410738270 | -7.31894200492820 | c  |
| 25.17467586235676  | 6.91838015804746   | -6.70589084789821 | c  |
| -6.59584491422097  | -25.26109889656463 | -6.70589084789821 | c  |
| -18.57883094813579 | 18.34271873851717  | -6.70589084789821 | c  |
| 25.17467586235676  | -6.91838015804746  | 6.70589084789821  | c  |
| -6.59584491422097  | 25.26109889656463  | 6.70589084789821  | c  |
| -18.57883094813579 | -18.34271873851717 | 6.70589084789821  | c  |
| 0.00000000000000   | 0.00000000000000   | 0.00000000000000  | au |
| 0.00000000000000   | 0.00000000000000   | 3.82813935883157  | c  |
| 0.00000000000000   | 0.00000000000000   | -3.82813935883157 | c  |
| 0.00000000000000   | 0.00000000000000   | 6.19958748552573  | c  |
| 0.00000000000000   | 0.00000000000000   | -6.19958748552573 | c  |
| 15.36753259209372  | -7.63562193233195  | 0.11095961626249  | c  |
| -1.07112379520328  | -17.12648457432312 | -0.11095961626249 | c  |
| -14.29640879689044 | -9.49086264199117  | 0.11095961626249  | c  |
| -14.29640879689044 | 9.49086264199117   | -0.11095961626249 | c  |
| -1.07112379520328  | 17.12648457432312  | 0.11095961626249  | c  |
| 15.36753259209372  | 7.63562193233195   | -0.11095961626249 | c  |
| 17.32449650359573  | 6.36277648648458   | -0.14188063805705 | c  |
| -3.15192221608374  | 18.18484213566308  | 0.14188063805705  | c  |
| -14.17257428751198 | -11.82206583815110 | 0.14188063805705  | c  |
| -3.15192221608374  | -18.18484213566308 | -0.14188063805705 | c  |
| 17.32449650359573  | -6.36277648648458  | 0.14188063805705  | c  |
| -14.17257428751198 | 11.82206583815110  | -0.14188063805705 | c  |
| 13.68271003071471  | -10.56322628651024 | -3.72510336424427 | h  |
| 11.99515398048447  | -8.06370801828338  | 3.92238755998310  | h  |
| 9.68970264925521   | -13.05973516587048 | -3.78386931163429 | h  |
| 8.02796932868563   | -10.56553194136498 | 3.86419401063873  | h  |
| -15.98937740071048 | -6.56796143821240  | -3.72510336424427 | h  |
| -12.98095286133570 | -6.35625409673693  | 3.92238755998310  | h  |
| -16.15491381947161 | -1.86166105419571  | -3.78386931163429 | h  |
| -13.16400363984164 | -1.66965939888874  | 3.86419401063873  | h  |
| 11.99515398048447  | 8.06370801828338   | -3.92238755998310 | h  |
| 13.68271003071471  | 10.56322628651024  | 3.72510336424427  | h  |
| 8.02796932868563   | 10.56553194136498  | -3.86419401063873 | h  |
| 9.68970264925521   | 13.05973516587048  | 3.78386931163429  | h  |
| -15.98937740071048 | 6.56796143821240   | 3.72510336424427  | h  |
| -12.98095286133570 | 6.35625409673693   | -3.92238755998310 | h  |
| -16.15491381947161 | 1.86166105419571   | 3.78386931163429  | h  |
| -13.16400363984164 | 1.66965939888874   | -3.86419401063873 | h  |
| 5.13603431115601   | 12.23519134025371  | 3.86419401063873  | h  |
| 6.46521117021640   | 14.92139622006619  | -3.78386931163429 | h  |
| 0.98579888085123   | 14.41996211502031  | 3.92238755998310  | h  |
| 2.30666718102316   | 17.13118772472264  | -3.72510336424427 | h  |
| 2.30666718102316   | -17.13118772472264 | 3.72510336424427  | h  |
| 0.98579888085123   | -14.41996211502031 | -3.92238755998310 | h  |
| 6.46521117021640   | -14.92139622006619 | 3.78386931163429  | h  |
| 5.13603431115601   | -12.23519134025371 | -3.86419401063873 | h  |
| -5.16760955613778  | -25.03720395536773 | 0.93212423360843  | h  |
| -5.13554808462202  | -27.56975860482231 | 4.91446108748597  | h  |
| -6.09172116197016  | -25.49600432707479 | 9.07151143714377  | h  |
| -7.09365754810578  | -20.84987679155406 | 9.22691967972309  | h  |
| -7.15510690660450  | -18.30483842229302 | 5.25747302574319  | h  |
| -10.41632672481686 | -21.91122219888272 | -2.66637484966442 | h  |
| -10.67665766455454 | -25.06571293072628 | -6.17642189978052 | h  |
| -6.71420016267712  | -26.64331205338014 | -8.26010555452067 | h  |
| -2.48440215991729  | -25.05418503439784 | -6.81206737834574 | h  |
| -2.20626470877465  | -21.92251765889682 | -3.27575596957174 | h  |
| -12.27490147829233 | -15.34892351400013 | -5.25747302574319 | h  |
| -14.50969424865948 | -16.56822621548876 | -9.22691967972309 | h  |
| -19.03432675575428 | -18.02358745837384 | -9.07151143714377 | h  |
| -21.30833739050243 | -18.23239444818056 | -4.91446108748597 | h  |
| -19.09904987580561 | -16.99388305849637 | -0.93212423360843 | h  |
| -13.76751167990056 | -19.97641475937096 | 2.66637484966442  | h  |
| -16.36921537698231 | -21.77911314568621 | 6.17642189978052  | h  |
| -19.71668494151614 | -19.13632396788633 | 8.26010555452067  | h  |
| -20.45535961165459 | -14.67864804815932 | 6.81206737834574  | h  |
| -17.88232476076224 | -12.87194004093532 | 3.27575596957174  | h  |
| -19.09904987580561 | 16.99388305849637  | 0.93212423360843  | h  |
| -21.30833739050243 | 18.23239444818056  | 4.91446108748597  | h  |
| -19.03432675575428 | 18.02358745837384  | 9.07151143714377  | h  |
| -14.50969424865948 | 16.56822621548876  | 9.22691967972309  | h  |
| -12.27490147829233 | 15.34892351400013  | 5.25747302574319  | h  |
| -17.88232476076224 | 12.87194004093532  | -3.27575596957174 | h  |
| -20.45535961165459 | 14.67864804815932  | -6.81206737834574 | h  |

|                    |                    |                    |   |
|--------------------|--------------------|--------------------|---|
| -19.71668494151614 | 19.13632396788633  | -8.26010555452067  | h |
| -16.36921537698231 | 21.77911314568621  | -6.17642189978052  | h |
| -13.76751167990056 | 19.97641475937096  | -2.66637484966442  | h |
| -7.15510690660450  | 18.30483842229302  | -5.25747302574319  | h |
| -6.09172116197016  | 25.49600432707479  | -9.07151143714377  | h |
| -7.09365754810578  | 20.84987679155406  | -9.22691967972309  | h |
| -5.13554808462202  | 27.56975860482231  | -4.91446108748597  | h |
| -5.16760955613778  | 25.03720395536773  | -0.93212423360843  | h |
| -2.20626470877465  | 21.92251765889682  | 3.27575596957174   | h |
| -2.48440215991729  | 25.05418503439784  | 6.81206737834574   | h |
| -6.71420016267712  | 26.64331205338014  | 8.26010555452067   | h |
| -10.67665766455454 | 25.06571293072628  | 6.17642189978052   | h |
| -10.41632672481686 | 21.91122219888272  | 2.66637484966442   | h |
| 24.18383840471742  | 1.93480743951176   | -2.66637484966442  | h |
| 27.04587285256423  | 3.28659978504007   | -6.17642189978052  | h |
| 26.43088510419326  | 7.50698808549381   | -8.26010555452067  | h |
| 22.93976196054449  | 10.37553717521113  | -6.81206737834574  | h |
| 20.08858946953689  | 9.05057761796150   | -3.27575596957174  | h |
| 24.26665924297078  | 8.04332089687136   | 0.93212423360843   | h |
| 26.44388547512445  | 9.33736415664175   | 4.91446108748597   | h |
| 25.12604810669705  | 7.47241686870096   | 9.07151143714377   | h |
| 21.60335179676526  | 4.28165076503791   | 9.22691967972309   | h |
| 19.43000838489683  | 2.95591471932028   | 5.25747302574319   | h |
| 24.18383840471742  | -1.93480743951176  | 2.66637484966442   | h |
| 27.04587285256423  | -3.28659978504007  | 6.17642189978052   | h |
| 26.43088510419326  | -7.50698808549381  | 8.26010555452067   | h |
| 22.93976196054449  | -10.37553717521113 | 6.81206737834574   | h |
| 20.08858946953689  | -9.05057761796150  | 3.27575596957174   | h |
| 24.26665924297078  | -8.04332089687136  | -0.93212423360843  | h |
| 26.44388547512445  | -9.33736415664175  | -4.91446108748597  | h |
| 25.12604810669705  | -7.47241686870096  | -9.07151143714377  | h |
| 21.60335179676526  | -4.28165076503791  | -9.22691967972309  | h |
| 19.43000838489683  | -2.95591471932028  | -5.25747302574319  | h |
| -3.90329679069824  | 14.27398511762500  | -9.53032390309809  | h |
| -11.93956674142258 | 13.18946826640012  | -8.17341833659942  | h |
| -4.85660712192767  | 15.84798431199571  | -13.88592191938718 | h |
| -9.35071752841456  | 16.11766618355675  | -15.39971784067118 | h |
| -12.88913409210060 | 14.78264515745780  | -12.52614094560471 | h |
| -1.50168069807347  | 8.96748522606284   | -14.70741742777898 | h |
| 0.98535970849795   | 12.99435744468671  | -15.09549990122336 | h |
| 2.86742394677781   | 14.98513668252842  | -11.21496448385050 | h |
| 2.30257970339773   | 12.93005554459040  | -6.97941150912559  | h |
| -2.08573476348478  | 6.93148125138153   | -10.48807868121946 | h |
| -7.07146498234640  | 8.34591877410546   | -9.16207410541834  | h |
| -8.92034014952700  | 8.68282500722732   | -13.49093022925574 | h |
| -11.32744438478690 | 5.02851494131844   | -15.35223866055505 | h |
| -11.86200387716135 | 1.03415413800257   | -12.83114879057607 | h |
| -10.01808810724389 | 0.69253379406961   | -8.50551578363093  | h |
| -12.34904639489701 | -4.47093518313840  | -6.97941150912559  | h |
| -14.41122099782003 | -5.00930644209550  | -11.21496448385050 | h |
| -11.74612360302144 | -5.64383206895437  | -15.09549990122336 | h |
| -7.01522956722092  | -5.78423626398381  | -14.70741742777898 | h |
| -4.95997136194425  | -5.27203979066592  | -10.48807868121946 | h |
| 5.60879597953283   | 8.32965182258097   | -8.50551578363093  | h |
| 6.82660560840387   | 9.75571966478973   | -12.83114879057607 | h |
| 10.01854372021453  | 7.29559708417298   | -15.35223866055505 | h |
| 11.97971699667754  | 3.38382865122101   | -13.49093022925574 | h |
| 10.76351004453981  | 1.95110897302449   | -9.16207410541834  | h |
| 17.39219802100510  | 3.74523386084745   | -8.17341833659942  | h |
| 19.24671326480191  | 3.77099498543617   | -12.52614094560471 | h |
| 18.63366721003248  | 0.03912583471833   | -15.39971784067118 | h |
| 16.15306056505309  | -3.71804693789146  | -13.88592191938718 | h |
| 14.31328216153097  | -3.75663835805941  | -9.53032390309809  | h |
| 7.04570612542903   | -1.65944127174300  | -10.48807868121946 | h |
| 8.51691045426700   | -3.18324896207904  | -14.70741742777898 | h |
| 10.76076370555088  | -7.35052537573234  | -15.09549990122336 | h |
| 11.54379724001484  | -9.97583024043292  | -11.21496448385050 | h |
| 10.04646669149928  | -8.45912036145200  | -6.97941150912559  | h |
| 4.40929212771106   | -9.02218561665058  | -8.50551578363093  | h |
| 5.03539826875748   | -10.78987380279231 | -12.83114879057607 | h |
| 1.30890047559975   | -12.32411202549142 | -15.35223866055505 | h |
| -3.05937684715054  | -12.06665365844833 | -13.49093022925574 | h |
| -3.69204525116602  | -10.29702755815733 | -9.16207410541834  | h |
| -5.45263127958252  | -16.93470212724757 | -8.17341833659942  | h |
| -6.35757936167392  | -18.55364014289397 | -12.52614094560471 | h |
| -9.28294949264531  | -16.15679201827508 | -15.39971784067118 | h |
| -11.29645344312541 | -12.12993718513163 | -13.88592191938718 | h |

|                    |                    |                    |   |
|--------------------|--------------------|--------------------|---|
| -10.40998537083273 | -10.51734675956559 | -9.53032390309809  | h |
| 17.39219802100510  | -3.74523386084745  | 8.17341833659942   | h |
| 19.24671326480191  | -3.77099498543617  | 12.52614094560471  | h |
| 18.63366721003248  | -0.03912583471833  | 15.39971784067118  | h |
| 16.15306056505309  | 3.71804693789146   | 13.88592191938718  | h |
| 14.31328216153097  | 3.75663835805941   | 9.53032390309809   | h |
| -5.45263127958252  | 16.93470212724757  | 8.17341833659942   | h |
| -10.40998537083273 | 10.51734675956559  | 9.53032390309809   | h |
| -11.29645344312541 | 12.12993718513163  | 13.88592191938718  | h |
| -9.28294949264531  | 16.15679201827508  | 15.39971784067118  | h |
| -6.35757936167392  | 18.55364014289397  | 12.52614094560471  | h |
| -3.90329679069824  | -14.27398511762500 | 9.53032390309809   | h |
| -4.85660712192767  | -15.84798431199571 | 13.88592191938718  | h |
| -9.35071752841456  | -16.11766618355675 | 15.39971784067118  | h |
| -12.88913409210060 | -14.78264515745780 | 12.52614094560471  | h |
| -11.93956674142258 | -13.18946826640012 | 8.17341833659942   | h |
| -10.01808810724389 | -0.69253379406961  | 8.50551578363093   | h |
| -11.86200387716135 | -1.03415413800257  | 12.83114879057607  | h |
| -11.32744438478690 | -5.02851494131844  | 15.35223866055505  | h |
| -8.92034014952700  | -8.68282500722732  | 13.49093022925574  | h |
| -7.07146498234640  | -8.34591877410546  | 9.16207410541834   | h |
| -12.34904639489701 | 4.47093518313840   | 6.97941150912559   | h |
| -14.41122099782003 | 5.00930644209550   | 11.21496448385050  | h |
| -11.74612360302144 | 5.64383206895437   | 15.09549990122336  | h |
| -7.01522956722092  | 5.78423626398381   | 14.70741742777898  | h |
| -4.95997136194425  | 5.27203979066592   | 10.48807868121946  | h |
| -3.692045252116602 | 10.29702755815733  | 9.16207410541834   | h |
| -3.05937684715054  | 12.06665365844833  | 13.49093022925574  | h |
| 1.30890047559975   | 12.32411202549142  | 15.35223866055505  | h |
| 5.03539826875748   | 10.78987380279231  | 12.83114879057607  | h |
| 4.40929212771106   | 9.02218561665058   | 8.50551578363093   | h |
| 11.54379724001484  | 9.97583024043292   | 11.21496448385050  | h |
| 10.04646669149928  | 8.45912036145200   | 6.97941150912559   | h |
| 7.04570612542903   | 1.65944127174300   | 10.48807868121946  | h |
| 8.51691045426700   | 3.18324896207904   | 14.70741742777898  | h |
| 10.76076370555088  | 7.35052537573234   | 15.09549990122336  | h |
| 11.97971699667754  | -3.38382865122101  | 13.49093022925574  | h |
| 10.76351004453981  | -1.95110897302449  | 9.16207410541834   | h |
| 10.01854372021453  | -7.29559708417298  | 15.35223866055505  | h |
| 6.82660560840387   | -9.75571966478973  | 12.83114879057607  | h |
| 5.60879597953283   | -8.32965182258097  | 8.50551578363093   | h |
| 2.30257970339773   | -12.93005554459040 | 6.97941150912559   | h |
| 2.86742394677781   | -14.98513668252842 | 11.21496448385050  | h |
| 0.98535970849795   | -12.99435744468671 | 15.09549990122336  | h |
| -1.50168069807347  | -8.96748522606284  | 14.70741742777898  | h |
| -2.08573476348478  | -6.93148125138153  | 10.48807868121946  | h |
| 0.00000000000000   | 0.00507922479723   | 9.10976128931320   | c |
| 2.14568534239299   | -0.77336095235552  | 10.42924644223669  | c |
| -2.14495112709858  | 0.78807689225919   | 10.42649129712399  | c |
| 2.14580987534515   | -0.76995388952150  | 13.06486805888988  | c |
| 3.83591775505344   | -1.39193201831693  | 9.39061028958666   | h |
| -2.14449063863452  | 0.79336559319825   | 13.06291457339728  | h |
| -3.83613261691475  | 1.40198849828927   | 9.38682987356056   | h |
| 0.00030090109214   | 0.01428700986602   | 14.38221162298150  | c |
| 3.83658152135762   | -1.38462868034760  | 14.10503269762524  | h |
| -3.83569506972594  | 1.41156092491266   | 14.10059131208964  | h |
| 0.00088119819303   | 0.01691671495802   | 16.46030410721775  | h |
| 0.00000000000000   | -0.00507922479723  | -9.10976128931320  | c |
| -1.14165706722279  | -1.98478481867832  | -10.42443255388578 | c |
| 1.14112267156967   | 1.96951997002483   | -10.43130420281731 | c |
| -1.14098557193873  | -1.99037871038784  | -13.06005037218944 | c |
| -2.03986271985562  | -3.54197450225452  | -9.38199897767445  | h |
| 1.14032813621710   | 1.96514893899316   | -13.06772910425507 | h |
| 2.040718822488560  | 3.53015647627289   | -9.39543810521917  | h |
| -0.00023409927334  | -0.01447052117079  | -14.38221130172805 | c |
| -2.03977656724122  | -3.55133788737309  | -14.09641779523338 | h |
| 2.03951880859669   | 3.52267864099245   | -14.10920319091969 | h |
| -0.00003749216648  | -0.01923440736822  | -16.46030006320383 | h |

**[Au<sub>13</sub>Cu<sub>12</sub>(C<sub>2</sub>Ph)<sub>20</sub>(PPh<sub>2</sub>-C<sub>2</sub>-(C<sub>6</sub>H<sub>4</sub>)<sub>2</sub>-C<sub>2</sub>-PPh<sub>2</sub>)<sub>3</sub>]<sup>5+</sup> (a hypothetical Cu-analogue of complex 10)**

|                  |                   |                   |    |
|------------------|-------------------|-------------------|----|
| 2.14988302884649 | 3.65301598145308  | -3.53285717837571 | cu |
| 8.48792300025160 | -0.06199889085817 | 3.80552065982922  | cu |
| 2.14988302884649 | -3.65301598145308 | 3.53285717837571  | cu |
| 2.08866308310030 | 3.68836141904257  | 3.53285717837571  | cu |

|                    |                    |                   |    |
|--------------------|--------------------|-------------------|----|
| 8.48792300025160   | 0.06199889085817   | -3.80552065982922 | cu |
| 2.08866308310030   | -3.68836141904257  | -3.53285717837571 | cu |
| -4.23854630091940  | 0.03534524861688   | -3.53285717837571 | cu |
| -4.23854630091940  | -0.03534524861688  | 3.53285717837571  | cu |
| -4.29765409976687  | -7.31975742175454  | 3.80552065982922  | cu |
| -4.29765409976687  | 7.31975742175454   | -3.80552065982922 | cu |
| -4.19026890048473  | -7.38175631261270  | -3.80552065982922 | cu |
| -4.19026890048473  | 7.38175631261270   | 3.80552065982922  | cu |
| 5.76661985902782   | -3.00940738593649  | -0.05290477281627 | au |
| -5.48953328458768  | -3.48933565169967  | -0.05290477281627 | au |
| -0.27708657444014  | 6.49874303763616   | -0.05290477281627 | au |
| -5.48953328458768  | 3.48933565169967   | 0.05290477281627  | au |
| -0.27708657444014  | -6.49874303763616  | 0.05290477281627  | au |
| 5.76661985902782   | 3.00940738593649   | 0.05290477281627  | au |
| -5.93704481032211  | 10.28326317095062  | 0.00000000000000  | au |
| 11.87408962064422  | 0.00000000000000   | 0.00000000000000  | au |
| -5.93704481032211  | -10.28326317095062 | 0.00000000000000  | au |
| 19.53582548943390  | 0.00000000000000   | 0.00000000000000  | au |
| -9.76791274471695  | 16.91852115826212  | 0.00000000000000  | au |
| -9.76791274471695  | -16.91852115826212 | 0.00000000000000  | au |
| -6.17125482161537  | -19.52229183778801 | -0.36967956447189 | p  |
| -13.82117328803305 | 15.10560936911646  | -0.36967956447189 | p  |
| 19.99242810964842  | 4.41668246867155   | -0.36967956447189 | p  |
| -13.82117328803305 | -15.10560936911646 | 0.36967956447189  | p  |
| 19.99242810964842  | -4.41668246867155  | 0.36967956447189  | p  |
| -6.17125482161537  | 19.52229183778801  | 0.36967956447189  | p  |
| 21.67137324480893  | -5.26766035035296  | 3.29246984132666  | c  |
| 21.67137324480893  | 5.26766035035296   | -3.29246984132666 | c  |
| -6.27375885829626  | 21.40178982797941  | 3.29246984132666  | c  |
| -15.39761419754006 | 16.13412947762645  | -3.29246984132666 | c  |
| -15.39761419754006 | -16.13412947762645 | 3.29246984132666  | c  |
| -6.27375885829626  | -21.40178982797941 | -3.29246984132666 | c  |
| 12.86295628289958  | -8.71893937438029  | 0.22115729494819  | c  |
| 12.19619948711820  | -10.12825498339364 | -1.96373045386603 | c  |
| 11.19768520603663  | -8.72934231674182  | 2.32373103005789  | c  |
| 9.92228485045760   | -11.47033659324289 | -2.04147340902772 | c  |
| 8.94656860338839   | -10.10717036406596 | 2.23300603430850  | c  |
| 8.250839093345545  | -11.48844489391126 | 0.05003654649177  | c  |
| -13.98230116469877 | -6.78017730499023  | 0.22115729494819  | c  |
| -14.86942591682263 | -5.49809109835306  | -1.96373045386603 | c  |
| -13.15867480111952 | -5.33280884775680  | 2.32373103005789  | c  |
| -14.89474541241410 | -2.85778256404782  | -2.04147340902772 | c  |
| -13.22635042928087 | -2.69437057540528  | 2.23300603430850  | c  |
| -14.07470480417200 | -1.40121378616383  | 0.05003654649177  | c  |
| 12.86295628289958  | 8.71893937438029   | -0.22115729494819 | c  |
| 11.19768520603663  | 8.72934231674182   | -2.32373103005789 | c  |
| 12.19619948711820  | 10.12825498339364  | 1.96373045386603  | c  |
| 8.94656860338839   | 10.10717036406596  | -2.23300603430850 | c  |
| 9.92228485045760   | 11.47033659324289  | 2.04147340902772  | c  |
| 8.250839093345545  | 11.48844489391126  | -0.05003654649177 | c  |
| -13.98230116469877 | 6.78017730499023   | 0.22115729494819  | c  |
| -14.86942591682263 | 5.49809109835306   | -1.96373045386603 | c  |
| -13.15867480111952 | 5.33280884775680   | -2.32373103005789 | c  |
| -14.89474541241410 | 2.85778256404782   | 2.04147340902772  | c  |
| -13.22635042928087 | 2.69437057540528   | -2.23300603430850 | c  |
| -14.07470480417200 | 1.40121378616383   | -0.05003654649177 | c  |
| 5.82386552174394   | 12.88965886904771  | 0.05003654649177  | c  |
| 4.27978201486510   | 12.80154075049863  | 2.23300603430850  | c  |
| 4.97246037298388   | 14.32811915729071  | -2.04147340902772 | c  |
| 1.96098959508289   | 14.06215116449862  | 2.32373103005789  | c  |
| 2.67322624073181   | 15.62634608174670  | -1.96373045386603 | c  |
| 1.11934488179919   | 15.49911667937052  | 0.22115729494819  | c  |
| 1.11934488179919   | -15.49911667937052 | -0.22115729494819 | c  |
| 2.67322624073181   | -15.62634608174670 | 1.96373045386603  | c  |
| 1.96098959508289   | -14.06215116449862 | -2.32373103005789 | c  |
| 4.97246037298388   | -14.32811915729071 | 2.04147340902772  | c  |
| 4.27978201486510   | -12.80154075049863 | -2.23300603430850 | c  |
| 5.82386552174394   | -12.88965886904771 | -0.05003654649177 | c  |
| 5.92605567491415   | 3.32696376832067   | 3.91017974019205  | c  |
| -0.08179263826446  | -6.79559671434413  | 3.91017974019205  | c  |
| -5.84426303664969  | 3.46863294602346   | 3.91017974019205  | c  |
| -5.84426303664969  | -3.46863294602346  | -3.91017974019205 | c  |
| 5.92605567491415   | -3.32696376832067  | -3.91017974019205 | c  |
| -0.08179263826446  | 6.79559671434413   | -3.91017974019205 | c  |
| 5.94652140893330   | 3.24911120904328   | -3.82106705877924 | c  |
| -0.15944791013359  | -6.77439417610576  | -3.82106705877924 | c  |
| -5.78707368777233  | 3.52528296706249   | -3.82106705877924 | c  |



|                    |                    |                    |   |
|--------------------|--------------------|--------------------|---|
| -5.78707368777233  | -3.52528296706249  | 3.82106705877924   | c |
| 5.94652140893330   | -3.24911120904328  | 3.82106705877924   | c |
| -0.15944791013359  | 6.77439417610576   | 3.82106705877924   | c |
| 12.32536888234240  | 0.45740802149236   | 3.79908519748368   | c |
| -5.76655749806543  | -10.90278663998574 | 3.79908519748368   | c |
| -6.55881157324958  | 10.44537861849339  | 3.79908519748368   | c |
| -6.55881157324958  | -10.44537861849339 | -3.79908519748368  | c |
| 12.32536888234240  | -0.45740802149236  | -3.79908519748368  | c |
| -5.76655749806543  | 10.90278663998574  | -3.79908519748368  | c |
| 13.86403548926132  | 0.83095264282383   | 5.56285446957103   | c |
| -6.21239170288432  | -12.42208317609736 | 5.56285446957103   | c |
| -7.65164378637700  | 11.59113053327352  | 5.56285446957103   | c |
| -7.65164378637700  | -11.59113053327352 | -5.56285446957103  | c |
| 13.86403548926132  | -0.83095264282383  | -5.56285446957103  | c |
| -6.21239170288432  | 12.42208317609736  | -5.56285446957103  | c |
| 7.08948711150311   | 3.70598594982093   | 5.96784299991804   | c |
| -0.33526576186591  | -7.99266886657811  | 5.96784299991804   | c |
| -6.75422153860982  | 4.28668310572979   | 5.96784299991804   | c |
| -6.75422153860982  | -4.28668310572979  | -5.96784299991804  | c |
| 7.08948711150311   | -3.70598594982093  | -5.96784299991804  | c |
| -0.33526576186591  | 7.99266886657811   | -5.96784299991804  | c |
| 7.36666968403081   | 3.52070510550557   | -5.76097411323321  | c |
| -0.63431492239506  | -8.14007563076556  | -5.76097411323321  | c |
| -6.73235495060836  | 4.61937052525998   | -5.76097411323321  | c |
| -6.73235495060836  | -4.61937052525998  | 5.76097411323321   | c |
| 7.36666968403081   | -3.52070510550557  | 5.76097411323321   | c |
| -0.63431492239506  | 8.14007563076556   | 5.76097411323321   | c |
| 8.14408411783863   | 4.59814001907485   | 8.28547871833431   | c |
| -0.08993603508891  | -9.35205375376312  | 8.28547871833431   | c |
| -8.05414808274972  | 4.75391373468827   | 8.28547871833431   | c |
| -8.05414808274972  | -4.75391373468827  | -8.28547871833431  | c |
| 8.14408411783863   | -4.59814001907485  | -8.28547871833431  | c |
| -0.08993603508891  | 9.35205375376312   | -8.28547871833431  | c |
| 8.30365013585553   | 4.66169642221174   | -8.04238907291523  | c |
| -0.11467746345633  | -9.52202006852496  | -8.04238907291523  | c |
| -8.18897248342659  | 4.86032364631322   | -8.04238907291523  | c |
| -8.18897248342659  | -4.86032364631322  | 8.04238907291523   | c |
| 8.30365013585553   | -4.66169642221174  | 8.04238907291523   | c |
| -0.11467746345633  | 9.52202006852496   | 8.04238907291523   | c |
| -8.79613733252525  | 12.90369084147483  | 7.61895851626477   | c |
| 15.57299268794648  | 1.16583290055863   | 7.61895851626477   | c |
| -6.77685535542123  | -14.06952374203347 | 7.61895851626477   | c |
| -6.77685535542123  | 14.06952374203347  | -7.61895851626477  | c |
| -8.79613733252525  | -12.90369084147483 | -7.61895851626477  | c |
| 15.57299268794648  | -1.16583290055863  | -7.61895851626477  | c |
| -9.47815593450104  | -2.70552033753454  | 9.01069967224229   | c |
| 2.39602873936767   | 9.56108392022614   | 9.01069967224229   | c |
| 7.08212719513337   | -6.85556358269160  | 9.01069967224229   | c |
| 2.39602873936767   | -9.56108392022614  | -9.01069967224229  | c |
| 7.08212719513337   | 6.85556358269160   | -9.01069967224229  | c |
| -9.47815593450104  | 2.70552033753454   | -9.01069967224229  | c |
| -10.70421610766825 | -4.30194207733500  | -8.43485155359041  | c |
| 1.62651695127496   | 11.42109410967215  | -8.43485155359041  | c |
| 9.07769915639329   | -7.11915203233715  | -8.43485155359041  | c |
| 1.62651695127496   | -11.42109410967215 | 8.43485155359041   | c |
| 9.07769915639329   | 7.11915203233715   | 8.43485155359041   | c |
| -10.70421610766825 | 4.30194207733500   | 8.43485155359041   | c |
| -8.39590297518335  | -7.18032171136821  | 9.37232975927853   | c |
| -2.02038954559050  | 10.86122608211780  | 9.37232975927853   | c |
| 10.41629233180124  | -3.68090437074959  | 9.37232975927853   | c |
| -2.02038954559050  | -10.86122608211780 | -9.37232975927853  | c |
| 10.41629233180124  | 3.68090437074959   | -9.37232975927853  | c |
| -8.39590297518335  | 7.18032171136821   | -9.37232975927853  | c |
| -6.77950248378818  | -5.62617824742096  | -10.48538601045271 | c |
| -1.48266211632688  | 8.68431052094038   | -10.48538601045271 | c |
| 8.26216460011506   | -3.05813227351943  | -10.48538601045271 | c |
| -1.48266211632688  | -8.68431052094038  | 10.48538601045271  | c |
| 8.26216460011506   | 3.05813227351943   | 10.48538601045271  | c |
| -6.77950248378818  | 5.62617824742096   | 10.48538601045271  | c |
| -10.90948817577079 | -2.87869654110570  | 11.22936381903787  | c |
| 2.96171976902789   | 10.88724213076185  | 11.22936381903787  | c |
| 7.94776840674290   | -8.00854558965616  | 11.22936381903787  | c |
| 2.96171976902789   | -10.88724213076185 | -11.22936381903787 | c |
| 7.94776840674290   | 8.00854558965616   | -11.22936381903787 | c |
| -10.90948817577079 | 2.87869654110570   | -11.22936381903787 | c |
| -12.00801092120217 | -4.68043267887408  | -10.70913336403864 | c |
| 1.95063181717593   | 12.73945890066324  | -10.70913336403864 | c |

|                    |                    |                    |   |
|--------------------|--------------------|--------------------|---|
| 10.05737910402624  | -8.05902622178916  | -10.70913336403864 | c |
| 1.95063181717593   | -12.73945890066324 | 10.70913336403864  | c |
| 10.05737910402624  | 8.05902622178916   | 10.70913336403864  | c |
| -12.00801092120217 | 4.68043267887408   | 10.70913336403864  | c |
| -9.84936409844181  | -7.33871685507316  | 11.58317837673373  | c |
| -1.43083316459806  | 12.19915804235185  | 11.58317837673373  | c |
| 11.28019726303988  | -4.86044118727869  | 11.58317837673373  | c |
| -1.43083316459806  | -12.19915804235185 | -11.58317837673373 | c |
| 11.28019726303988  | 4.86044118727869   | -11.58317837673373 | c |
| -9.84936409844181  | 7.33871685507316   | -11.58317837673373 | c |
| -8.09914737526168  | -5.98833008784249  | -12.75138118283561 | c |
| -1.13647241460460  | 10.00823261854306  | -12.75138118283561 | c |
| 9.23561978986628   | -4.01990234172795  | -12.75138118283561 | c |
| -1.13647241460460  | -10.00823261854306 | 12.75138118283561  | c |
| 9.23561978986628   | 4.01990234172795   | 12.75138118283561  | c |
| -8.09914737526168  | 5.98833008784249   | 12.75138118283561  | c |
| -11.10664387013260 | -5.19467251305945  | 12.52414312713702  | c |
| 1.05460362037698   | 12.21597206959181  | 12.52414312713702  | c |
| 10.05204024975561  | -7.02129955653236  | 12.52414312713702  | c |
| 1.05460362037698   | -12.21597206959181 | -12.52414312713702 | c |
| 10.05204024975561  | 7.02129955653236   | -12.52414312713702 | c |
| -11.10664387013260 | 5.19467251305945   | -12.52414312713702 | c |
| -10.71298916124017 | -5.51478682873711  | -12.87919583339514 | c |
| 0.58054900138004   | 12.03511412929047  | -12.87919583339514 | c |
| 10.13244015986014  | -6.52032730055337  | -12.87919583339514 | c |
| 0.58054900138004   | -12.03511412929047 | 12.87919583339514  | c |
| 10.13244015986014  | 6.52032730055337   | 12.87919583339514  | c |
| -10.71298916124017 | 5.51478682873711   | 12.87919583339514  | c |
| -9.33301570783737  | -14.59111139834134 | 8.28564123478174   | c |
| -7.96976538584753  | 15.37818441138695  | 8.28564123478174   | c |
| 17.30278090471229  | -0.78707301304562  | 8.28564123478174   | c |
| -7.96976538584753  | -15.37818441138695 | -8.28564123478174  | c |
| 17.30278090471229  | 0.78707301304562   | -8.28564123478174  | c |
| -9.33301570783737  | 14.59111139834134  | -8.28564123478174  | c |
| -10.77329334570237 | -11.78767735787530 | -9.06041968960680  | c |
| -4.82178154799734  | 15.22378433769953  | -9.06041968960680  | c |
| 15.59507470472709  | -3.43610697982423  | -9.06041968960680  | c |
| -4.82178154799734  | -15.22378433769953 | 9.06041968960680   | c |
| 15.59507470472709  | 3.43610697982423   | 9.06041968960680   | c |
| -10.77329334570237 | 11.78767735787530  | 9.06041968960680   | c |
| -9.89897507860846  | -16.20045111701359 | 10.31218146098955  | c |
| -9.08051447038607  | 16.67298941976151  | 10.31218146098955  | c |
| 18.97948973796714  | -0.47253849172053  | 10.31218146098955  | c |
| -9.08051447038607  | -16.67298941976151 | -10.31218146098955 | c |
| 18.97948973796714  | 0.47253849172053   | -10.31218146098955 | c |
| -9.89897507860846  | 16.20045111701359  | -10.31218146098955 | c |
| -11.86158076748020 | -13.09227795063229 | -11.09136448948515 | c |
| -5.40745491973192  | 16.81856919672369  | -11.09136448948515 | c |
| 17.26903568721212  | -3.72629124609140  | -11.09136448948515 | c |
| -5.40745491973192  | -16.81856919672369 | 11.09136448948515  | c |
| 17.26903568721212  | 3.72629124609140   | 11.09136448948515  | c |
| -11.86158076748020 | 13.09227795063229  | 11.09136448948515  | c |
| -7.94199415957126  | -17.31549536007957 | 11.72866139971790  | c |
| -11.02466188130962 | 15.53571632819441  | 11.72866139971790  | c |
| 18.96665604088087  | 1.77977903188516   | 11.72866139971790  | c |
| -11.02466188130962 | -15.53571632819441 | -11.72866139971790 | c |
| 18.96665604088087  | -1.77977903188516  | -11.72866139971790 | c |
| -7.94199415957126  | 17.31549536007957  | -11.72866139971790 | c |
| -5.96832960439726  | -21.81974698185858 | 2.23594285769162   | c |
| -15.91229055846213 | -16.07859855240331 | -2.23594285769162  | c |
| -15.91229055846213 | 16.07859855240331  | 2.23594285769162   | c |
| -5.96832960439726  | 21.81974698185858  | -2.23594285769162  | c |
| 21.88061997388677  | 5.74114842945527   | 2.23594285769162   | c |
| 21.88061997388677  | -5.74114842945527  | -2.23594285769162  | c |
| 23.33358579992581  | 7.94765823570935   | 1.86172360413070   | c |
| -4.78391899519884  | -24.18130711656242 | 1.86172360413070   | c |
| -18.54966680472697 | 16.23364906982567  | 1.86172360413070   | c |
| 23.33358579992581  | -7.94765823570935  | -1.86172360413070  | c |
| -4.78391899519884  | 24.18130711656242  | -1.86172360413070  | c |
| -18.54966680472697 | -16.23364906982567 | -1.86172360413070  | c |
| 20.80990870589830  | 7.21332766800519   | -4.89604816296497  | c |
| -4.15802922779464  | -21.62857340454304 | -4.89604816296497  | c |
| -16.65187947810366 | 14.41524573653786  | -4.89604816296497  | c |
| 20.80990870589830  | -7.21332766800519  | 4.89604816296497   | c |
| -4.15802922779464  | 21.62857340454304  | 4.89604816296497   | c |
| -16.65187947810366 | -14.41524573653786 | 4.89604816296497   | c |
| 24.73402423145731  | 8.95721229685925   | 3.87584020382309   | c |

|                    |                    |                    |    |
|--------------------|--------------------|--------------------|----|
| -4.60983874664571  | -25.89889941881180 | 3.87584020382309   | c  |
| -20.12418548481160 | 16.94168712195255  | 3.87584020382309   | c  |
| 24.73402423145731  | -8.957212229685925 | -3.87584020382309  | c  |
| -4.60983874664571  | 25.89889941881180  | -3.87584020382309  | c  |
| -20.12418548481160 | -16.94168712195255 | -3.87584020382309  | c  |
| 22.20228462088385  | 7.84592482934546   | -7.06931447400717  | c  |
| -4.30637216230832  | -23.15070490779921 | -7.06931447400717  | c  |
| -17.89591245857553 | 15.30478007845376  | -7.06931447400717  | c  |
| 22.20228462088385  | -7.84592482934546  | 7.06931447400717   | c  |
| -4.30637216230832  | 23.15070490779921  | 7.06931447400717   | c  |
| -17.89591245857553 | -15.30478007845376 | 7.06931447400717   | c  |
| 21.83268121237512  | 4.55824922321793   | 4.62480046433022   | c  |
| -6.96878104373766  | -21.18678113494979 | 4.62480046433022   | c  |
| -14.86390016863746 | 16.62853191173186  | 4.62480046433022   | c  |
| 21.83268121237512  | -4.55824922321793  | -4.62480046433022  | c  |
| -6.96878104373766  | 21.18678113494979  | -4.62480046433022  | c  |
| -14.86390016863746 | -16.62853191173186 | -4.62480046433022  | c  |
| 23.91867524628533  | 3.95199503314270   | -3.88222332075475  | c  |
| -8.53680945941890  | -22.69017789332453 | -3.88222332075475  | c  |
| -15.38186559789382 | 18.73818286018183  | -3.88222332075475  | c  |
| 23.91867524628533  | -3.95199503314270  | 3.88222332075475   | c  |
| -8.53680945941890  | 22.69017789332453  | 3.88222332075475   | c  |
| -15.38186559789382 | -18.73818286018183 | 3.88222332075475   | c  |
| 23.23574390658736  | 5.58661021678753   | 6.63077687973259   | c  |
| -6.77972547147186  | -22.91604948805643 | 6.63077687973259   | c  |
| -16.45601824614289 | 17.32943927126890  | 6.63077687973259   | c  |
| 23.23574390658736  | -5.58661021678753  | -6.63077687973259  | c  |
| -6.77972547147186  | 22.91604948805643  | -6.63077687973259  | c  |
| -16.45601824614289 | -17.32943927126890 | -6.63077687973259  | c  |
| 25.30498230579512  | 4.60355880876090   | -6.04693181803157  | c  |
| -8.66569218318874  | -24.21653690291258 | -6.04693181803157  | c  |
| -16.63929012260638 | 19.61297809415167  | -6.04693181803157  | c  |
| 25.30498230579512  | -4.60355880876090  | 6.04693181803157   | c  |
| -8.66569218318874  | 24.21653690291258  | 6.04693181803157   | c  |
| -16.63929012260638 | -19.61297809415167 | 6.04693181803157   | c  |
| 24.68768701284328  | 7.77882141025714   | 6.25804710830961   | c  |
| -5.60718649978546  | -25.26957488518846 | 6.25804710830961   | c  |
| -19.08050051305782 | 17.49075328595871  | 6.25804710830961   | c  |
| 24.68768701284328  | -7.77882141025714  | -6.25804710830961  | c  |
| -5.60718649978546  | 25.26957488518846  | -6.25804710830961  | c  |
| -19.08050051305782 | -17.49075328595871 | -6.25804710830961  | c  |
| 24.44883677903072  | 6.55077211136245   | -7.64280478136304  | c  |
| -6.55128328228139  | -24.44869977388608 | -7.64280478136304  | c  |
| -17.89755349674932 | 17.89792766252364  | -7.64280478136304  | c  |
| 24.44883677903072  | -6.55077211136245  | 7.64280478136304   | c  |
| -6.55128328228139  | 24.44869977388608  | 7.64280478136304   | c  |
| -17.89755349674932 | -17.89792766252364 | 7.64280478136304   | c  |
| 0.0000000000000000 | 0.0000000000000000 | 0.0000000000000000 | au |
| 0.0000000000000000 | 0.0000000000000000 | 3.88051122887836   | c  |
| 0.0000000000000000 | 0.0000000000000000 | -3.88051122887836  | c  |
| 0.0000000000000000 | 0.0000000000000000 | 6.26717391861361   | c  |
| 0.0000000000000000 | 0.0000000000000000 | -6.26717391861361  | c  |
| 15.16784938902918  | -7.33319375250458  | 0.30779311231863   | c  |
| -1.23319256651057  | -16.80233966177663 | -0.30779311231863  | c  |
| -13.93465663354600 | -9.46914609824466  | 0.30779311231863   | c  |
| -13.93465663354600 | 9.46914609824466   | -0.30779311231863  | c  |
| -1.23319256651057  | 16.80233966177663  | 0.30779311231863   | c  |
| 15.16784938902918  | 7.33319375250458   | -0.30779311231863  | c  |
| 17.18851218901850  | 6.17096720529795   | -0.40611537404005  | c  |
| -3.25004171019111  | 17.97117174668076  | 0.40611537404005   | c  |
| -13.93847028985478 | -11.80020454138282 | 0.40611537404005   | c  |
| -3.25004171019111  | -17.97117174668076 | -0.40611537404005  | c  |
| 17.18851218901850  | -6.17096720529795  | 0.40611537404005   | c  |
| -13.93847028985478 | 11.80020454138282  | -0.40611537404005  | c  |
| 13.49188794245989  | -10.16012748229611 | -3.59141090952101  | h  |
| 11.67376032021485  | -7.62050317840579  | 4.01804209532274   | h  |
| 9.45269943376493   | -12.58820389817877 | -3.73535323878904  | h  |
| 7.65978378169441   | -10.04485702277929 | 3.86799538372764   | h  |
| -15.54487242925347 | -6.60425400653970  | -3.59141090952101  | h  |
| -12.43642959895300 | -6.29952130569328  | 4.01804209532274   | h  |
| -15.62805420519821 | -1.89217597384432  | -3.73535323878904  | h  |
| -12.52899329822968 | -1.61113892692338  | 3.86799538372764   | h  |
| 11.67376032021485  | 7.62050317840579   | -4.01804209532274  | h  |
| 13.49188794245989  | 10.16012748229611  | 3.59141090952101   | h  |
| 7.65978378169441   | 10.04485702277929  | -3.86799538372764  | h  |
| 9.45269943376493   | 12.58820389817877  | 3.73535323878904   | h  |
| -15.54487242925347 | 6.60425400653970   | 3.59141090952101   | h  |

|                    |                    |                    |   |
|--------------------|--------------------|--------------------|---|
| -12.43642959895300 | 6.29952130569328   | -4.01804209532274  | h |
| -15.62805420519821 | 1.89217597384432   | 3.73535323878904   | h |
| -12.52899329822968 | 1.61113892692338   | -3.86799538372764  | h |
| 4.86920951653527   | 11.65599594970266  | 3.86799538372764   | h |
| 6.17535477143328   | 14.48037987202309  | -3.73535323878904  | h |
| 0.76266927873814   | 13.92002467307168  | 4.01804209532274   | h |
| 2.05298448679358   | 16.76438148883581  | -3.59141090952101  | h |
| 2.05298448679358   | -16.76438148883581 | 3.59141090952101   | h |
| 0.76266927873814   | -13.92002467307168 | -4.01804209532274  | h |
| 6.17535477143328   | -14.48037987202309 | 3.73535323878904   | h |
| 4.86920951653527   | -11.65599594970266 | -3.86799538372764  | h |
| -4.00794963496483  | -24.68965383980239 | -0.00322519559100  | h |
| -3.69401340093342  | -27.74609632021378 | 3.57847516722357   | h |
| -5.47478340520266  | -26.62912172190307 | 7.83114433639709   | h |
| -7.56377492270486  | -22.41040696291262 | 8.49221286754587   | h |
| -7.89174634169783  | -19.34174362359985 | 4.93247225623111   | h |
| -10.20425901256784 | -22.51166378034581 | -2.64234773777524  | h |
| -10.43029803703512 | -25.22970185275719 | -6.49183155327774  | h |
| -6.65571540653566  | -25.65144771856018 | -9.34058897428752  | h |
| -2.64592517831740  | -23.33180076462068 | -8.31435146597344  | h |
| -2.39190894742537  | -20.62327954198713 | -4.43962714543182  | h |
| -12.80456828073613 | -16.50532479142953 | -4.93247225623111  | h |
| -15.62609418125318 | -17.75562485964850 | -8.49221286754587  | h |
| -20.32410433672491 | -18.05586227997001 | -7.83114433639709  | h |
| -22.18181756405640 | -17.07215778259185 | -3.57847516722357  | h |
| -19.37789257274105 | -15.81581304739162 | 0.00322519559100   | h |
| -14.39354317676473 | -20.09297949231620 | 2.64234773777524   | h |
| -16.63441368432046 | -21.64775393581922 | 6.49183155327774   | h |
| -18.88694758156837 | -18.58974241579969 | 9.34058897428752   | h |
| -18.88296951908603 | -13.95733882734642 | 8.31435146597344   | h |
| -16.66432956078495 | -12.38309377960582 | 4.43962714543182   | h |
| -19.37789257274105 | 15.81581304739162  | -0.00322519559100  | h |
| -22.18181756405640 | 17.07215778259185  | 3.57847516722357   | h |
| -20.32410433672491 | 18.05586227997001  | 7.83114433639709   | h |
| -15.62609418125318 | 17.75562485964850  | 8.49221286754587   | h |
| -12.80456828073613 | 16.50532479142953  | 4.93247225623111   | h |
| -16.66432956078495 | 12.38309377960582  | -4.43962714543182  | h |
| -18.88296951908603 | 13.95733882734642  | -8.31435146597344  | h |
| -18.88694758156837 | 18.58974241579969  | -9.34058897428752  | h |
| -16.63441368432046 | 21.64775393581922  | -6.49183155327774  | h |
| -14.39354317676473 | 20.09297949231620  | -2.64234773777524  | h |
| -7.89174634169783  | 19.34174362359985  | -4.93247225623111  | h |
| -5.47478340520266  | 26.62912172190307  | -7.83114433639709  | h |
| -7.56377492270486  | 22.41040696291262  | -8.49221286754587  | h |
| -3.69401340093342  | 27.74609632021378  | -3.57847516722357  | h |
| -4.00794963496483  | 24.68965383980239  | 0.00322519559100   | h |
| -2.39190894742537  | 20.62327954198713  | 4.43962714543182   | h |
| -2.64592517831740  | 23.33180076462068  | 8.31435146597344   | h |
| -6.65571540653566  | 25.65144771856018  | 9.34058897428752   | h |
| -10.43029803703512 | 25.22970185275719  | 6.49183155327774   | h |
| -10.20425901256784 | 22.51166378034581  | 2.64234773777524   | h |
| 24.59780218933257  | 2.41868428802961   | -2.64234773777524  | h |
| 27.06471172135558  | 3.58194791693797   | -6.49183155327774  | h |
| 25.54266298810403  | 7.06170530276050   | -9.34058897428752  | h |
| 21.52889488637605  | 9.37446193727427   | -8.31435146597344  | h |
| 19.05623850821032  | 8.24018576238131   | -4.43962714543182  | h |
| 23.38584220770588  | 8.87384079241076   | -0.00322519559100  | h |
| 25.87583115396244  | 10.67393872659454  | 3.57847516722357   | h |
| 25.79888755295496  | 8.57325944193306   | 7.83114433639709   | h |
| 23.18986929293066  | 4.65478229223674   | 8.49221286754587   | h |
| 20.69631462243396  | 2.83641902114294   | 4.93247225623111   | h |
| 24.59780218933257  | -2.41868428802961  | 2.64234773777524   | h |
| 27.06471172135558  | -3.58194791693797  | 6.49183155327774   | h |
| 25.54266298810403  | -7.06170530276050  | 9.34058897428752   | h |
| 21.52889488637605  | -9.37446193727427  | 8.31435146597344   | h |
| 19.05623850821032  | -8.24018576238131  | 4.43962714543182   | h |
| 23.38584220770588  | -8.87384079241076  | 0.00322519559100   | h |
| 25.87583115396244  | -10.67393872659454 | -3.57847516722357  | h |
| 25.79888755295496  | -8.57325944193306  | -7.83114433639709  | h |
| 23.18986929293066  | -4.65478229223674  | -8.49221286754587  | h |
| 20.69631462243396  | -2.83641902114294  | 4.93247225623111   | h |
| -2.83922507547766  | 14.82554723190748  | -8.57001591599858  | h |
| -10.86410961522397 | 13.70707086823896  | -7.18689984803678  | h |
| -3.86721587169783  | 17.68340840856243  | -12.19620931369409 | h |
| -8.39286826398655  | 18.56379326346074  | -13.33507015315805 | h |
| -11.88907987319334 | 16.58201252351861  | -10.79653017412278 | h |
| -2.22768758908011  | 9.45898560774598   | -14.43839582652877 | h |

|                    |                    |                    |   |
|--------------------|--------------------|--------------------|---|
| 0.84388328286072   | 13.07170469119618  | -14.66671008126004 | h |
| 3.28429923244590   | 14.33909374180744  | -10.79341722826408 | h |
| 2.68075812217966   | 11.97233194695023  | -6.72699757702163  | h |
| -2.84068507788793  | 7.11124371744364   | -10.38910748754400 | h |
| -7.42176597224338  | 8.85792854248141   | -8.62403014702746  | h |
| -9.99562172016786  | 9.16070329808155   | -12.58216981366386 | h |
| -12.23579832028759 | 5.32385286869522   | -14.27026160125276 | h |
| -11.87173464393742 | 1.18084394009521   | -11.95889032496701 | h |
| -9.31061054788803  | 0.88709980773891   | -8.00978789561591  | h |
| -11.70872252134460 | -3.66456145223456  | -6.72699757702163  | h |
| -14.06016903075784 | -4.32526035295174  | -10.79341722826408 | h |
| -11.74237004000369 | -5.80502816473349  | -14.66671008126004 | h |
| -7.07787814592357  | -6.65872687410103  | -14.43839582652877 | h |
| -4.73817515059053  | -6.01572733731707  | -10.38910748754400 | h |
| 5.42355633124717   | 7.61967528938698   | -8.00978789561591  | h |
| 6.95850811453406   | 9.69080171397410   | -11.95889032496701 | h |
| 10.72849115162607  | 7.93458586621250   | -14.27026160125276 | h |
| 12.93121262390157  | 4.07611054479711   | -12.58216981366386 | h |
| 11.38207409961726  | 1.99847363573697   | -8.62403014702746  | h |
| 17.30272629162704  | 2.55505958694373   | -7.18689984803678  | h |
| 20.30498408771237  | 2.00523885529270   | -10.79653017412278 | h |
| 20.27315070614085  | -2.01345954191598  | -13.33507015315805 | h |
| 17.24788889589468  | -5.49259709756692  | -12.19620931369409 | h |
| 14.25891303993433  | -4.95393255311400  | -8.57001591599858  | h |
| 7.57886022847846   | -1.09551638012657  | -10.38910748754400 | h |
| 9.30556573500368   | -2.80025873364494  | -14.43839582652877 | h |
| 10.89848675714297  | -7.26667671543530  | -14.66671008126004 | h |
| 10.77586979831194  | -10.01383338885570 | -10.79341722826408 | h |
| 9.02796458813756   | -8.30777049471567  | -6.72699757702163  | h |
| 3.88705421664086   | -8.50677509712588  | -8.00978789561591  | h |
| 4.91322652940335   | -10.87164565406931 | -11.95889032496701 | h |
| 1.50730735763413   | -13.25843873490772 | -14.27026160125276 | h |
| -2.93559109270632  | -13.23681403185127 | -12.58216981366386 | h |
| -3.96030812737388  | -10.85640217821839 | -8.62403014702746  | h |
| -6.43861667640307  | -16.26213026621008 | -7.18689984803678  | h |
| -8.41590421451904  | -18.58725137881132 | -10.79653017412278 | h |
| -11.88028244215430 | -16.55033372154476 | -13.33507015315805 | h |
| -13.38067302419685 | -12.19081131099551 | -12.19620931369409 | h |
| -11.41968796445667 | -9.87161467879347  | -8.57001591599858  | h |
| 17.30272629162704  | -2.55505958694373  | 7.18689984803678   | h |
| 20.30498408771237  | -2.00523885529270  | 10.79653017412278  | h |
| 20.27315070614085  | 2.01345954191598   | 13.33507015315805  | h |
| 17.24788889589468  | 5.49259709756692   | 12.19620931369409  | h |
| 14.25891303993433  | 4.95393255311400   | 8.57001591599858   | h |
| -6.43861667640307  | 16.26213026621008  | 7.18689984803678   | h |
| -11.41968796445667 | 9.87161467879347   | 8.57001591599858   | h |
| -13.38067302419685 | 12.19081131099551  | 12.19620931369409  | h |
| -11.88028244215430 | 16.55033372154476  | 13.33507015315805  | h |
| -8.41590421451904  | 18.58725137881132  | 10.79653017412278  | h |
| -2.83922507547766  | -14.82554723190748 | 8.57001591599858   | h |
| -3.86721587169783  | -17.68340840856243 | 12.19620931369409  | h |
| -8.39286826398655  | -18.56379326346074 | 13.33507015315805  | h |
| -11.88907987319334 | -16.58201252351861 | 10.79653017412278  | h |
| -10.86410961522397 | -13.70707086823896 | 7.18689984803678   | h |
| -9.31061054788803  | -0.88709980773891  | 8.00978789561591   | h |
| -11.87173464393742 | -1.18084394009521  | 11.95889032496701  | h |
| -12.23579832028759 | -5.32385286869522  | 14.27026160125276  | h |
| -9.99562172016786  | -9.16070329808155  | 12.58216981366386  | h |
| -7.42176597224338  | -8.85792854248141  | 8.62403014702746   | h |
| -11.70872252134460 | 3.66456145223456   | 6.72699757702163   | h |
| -14.06016903075784 | 4.32526035295174   | 10.79341722826408  | h |
| -11.74237004000369 | 5.80502816473349   | 14.66671008126004  | h |
| -7.07787814592357  | 6.65872687410103   | 14.43839582652877  | h |
| -4.73817515059053  | 6.01572733731707   | 10.38910748754400  | h |
| -3.96030812737388  | 10.85640217821839  | 8.62403014702746   | h |
| -2.93559109270632  | 13.23681403185127  | 12.58216981366386  | h |
| 1.50730735763413   | 13.25843873490772  | 14.27026160125276  | h |
| 4.91322652940335   | 10.87164565406931  | 11.95889032496701  | h |
| 3.88705421664086   | 8.50677509712588   | 8.00978789561591   | h |
| 10.77586979831194  | 10.01383338885570  | 10.79341722826408  | h |
| 9.02796458813756   | 8.30777049471567   | 6.72699757702163   | h |
| 7.57886022847846   | 1.09551638012657   | 10.38910748754400  | h |
| 9.30556573500368   | 2.80025873364494   | 14.43839582652877  | h |
| 10.89848675714297  | 7.26667671543530   | 14.66671008126004  | h |
| 12.93121262390157  | -4.07611054479711  | 12.58216981366386  | h |
| 11.38207409961726  | -1.99847363573697  | 8.62403014702746   | h |
| 10.72849115162607  | -7.93458586621250  | 14.27026160125276  | h |

|                   |                    |                    |   |
|-------------------|--------------------|--------------------|---|
| 6.95850811453406  | -9.69080171397410  | 11.95889032496701  | h |
| 5.42355633124717  | -7.61967528938698  | 8.00978789561591   | h |
| 2.68075812217966  | -11.97233194695023 | 6.72699757702163   | h |
| 3.28429923244590  | -14.33909374180744 | 10.79341722826408  | h |
| 0.84388328286072  | -13.07170469119618 | 14.66671008126004  | h |
| -2.22768758908011 | -9.45898560774598  | 14.43839582652877  | h |
| -2.84068507788793 | -7.11124371744364  | 10.38910748754400  | h |
| 0.00000000000000  | 0.00507922479723   | 9.17734772240109   | c |
| -2.14561345721089 | 0.78831802131375   | 10.49410722883681  | c |
| 2.14487924191648  | -0.77351488944631  | 10.49680322552155  | c |
| -2.14573789567674 | 0.79411101456863   | 13.12972468809251  | c |
| -3.83578910249832 | 1.40341539269769   | 9.45331790333370   | h |
| 2.14441869676064  | -0.76960068081000  | 13.13322890174702  | c |
| 3.83600405884593  | -1.39120753511211  | 9.45929136543428   | h |
| -0.00030090109214 | 0.01427580379006   | 14.44979807496664  | c |
| -3.83645277431619 | 1.41256858357850   | 14.16773707994059  | h |
| 3.83556637937629  | -1.38432575724850  | 14.17305749048417  | h |
| -0.00088110370672 | 0.01890005812353   | 16.52788708210681  | h |
| 0.00000000000000  | -0.00507922479723  | -9.17734772240109  | c |
| -1.14165706722279 | -1.98478481867832  | -10.49201898697366 | c |
| 1.14112267156967  | 1.96951997002483   | -10.49889063590519 | c |
| -1.14098557193873 | -1.99037871038784  | -13.12763680527733 | c |
| -2.03986271985562 | -3.54197450225452  | -9.44958541076233  | h |
| 1.14032813621710  | 1.96514893899316   | -13.13531553734295 | c |
| 2.04071882248560  | 3.53015647627289   | -9.46302453830705  | h |
| -0.00023409927334 | -0.01447052117079  | -14.44979773481593 | c |
| -2.03977656724122 | -3.55133788737309  | -14.16400422832126 | h |
| 2.03951880859669  | 3.52267864099245   | -14.17678962400757 | h |
| -0.00003749216648 | -0.01923440736822  | -16.52788649629171 | h |
